# Supplementary material for: Synthesis of 3-(aminomethylene)-2-oxoindolines by palladium-catalyzed annulation of 3-chloro-2-iodo-N-arylacrylamides with amides or amines
Source: Royal Society of Chemistry journal article supplement (doi:10.1039/c1cc11602a), 2011-01-01

# Synthesis of 3-(Aminomethylene)-2-oxoindolines by Palladium Catalyzed Oxidative Tandem Reactions of 3-Chloro-2-iodo-*N*-arylacrylamides with Amides

Guo-Bo Deng,<sup>b</sup> Zhi-Qiang Wang,<sup>b</sup> Ren-Jie Song,<sup>b</sup> Ming-Bo Zhou,<sup>b</sup> Wen-Ting Wei,<sup>b</sup> Peng Xie,<sup>b</sup> and Jin-Heng Li\*<sup>a</sup>

<sup>a</sup> *State Key Laboratory of Chemo/Biosensing and Chemometrics, College of Chemistry and Chemical Engineering, Hunan University, Changsha 410082, China, and* <sup>b</sup> *Key Laboratory of Chemical Biology & Traditional Chinese Medicine Research, Hunan Normal University, Changsha 410081, China*

[jhli@hunnu.edu.cn](mailto:jhli@hunnu.edu.cn)

## Supporting Information

### List of Contents

|                                                                |         |
|----------------------------------------------------------------|---------|
| (A) Typical experimental procedure                             | S2-S4   |
| (B) Analytical data for 1 and 3-24                             | S4-S16  |
| (C) References                                                 | S17     |
| (D) Spectra                                                    | S18-S73 |
| (E) The X-ray single-crystal diffraction analysis of product 3 | S74     |

### (A) Typical Experimental Procedure

#### Typical Experimental Procedure for the Synthesis of

##### 3-Chloro-2-iodo-N-arylacrylamides (**1**):

To a three-neck flask were added *N*-arylpropiolamides (3 mmol) and CH<sub>2</sub>Cl<sub>2</sub> (5 mL). Then ICl (4 mmol)/CH<sub>2</sub>Cl<sub>2</sub> (2 mL) solution was dropped in the flask at 0 °C for about 1 h. The mixture was stirred at room temperature for about 1-5 h until complete consumption of starting material as monitored by TLC analysis. After the reaction was finished, the reaction mixture was diluted in diethyl ether, and washed with saturated Na<sub>2</sub>S<sub>2</sub>O<sub>3</sub> and brine. The aqueous phase was extracted with diethyl ether. The combined organic extracts were dried over Na<sub>2</sub>SO<sub>4</sub> and concentrated in vacuum, and the resulting residue was purified by silica gel column chromatography (hexane/ethyl acetate) to afford 3-chloro-2-iodo-*N*-arylacrylamides (**1**).

#### Typical Experimental Procedure for Palladium-Catalyzed Synthesis

##### 3-(Aminomethylene)-2-oxoindolines:

To a Schlenk tube were added 3-Chloro-2-iodo-*N*-arylacrylamides **1** (0.3 mmol), amides **2** (0.45 mmol), Pd(dba)<sub>2</sub> (10 mol %), Ag(OAc)<sub>2</sub> (2 equiv), dimethylbis(diphenylphosphino)ethane (**L8**, 10 mol %), Na<sub>2</sub>CO<sub>3</sub> (2 equiv), and toluene (2 mL). Then the tube was charged with argon, and was stirred at 50 °C (oil bath temperature) for the indicated time until complete consumption of starting material as monitored by TLC and GC-MS analysis. After the reaction was finished, the reaction mixture was diluted in diethyl ether, and washed with brine. The aqueous phase was extracted with diethyl ether.

The combined organic extracts were dried over Na<sub>2</sub>SO<sub>4</sub> and concentrated in vacuum, and the resulting residue was purified by silica gel column chromatography (hexane/ethyl acetate) to afford the product.

**Table S1** Screening Optimal Conditions<sup>d</sup>

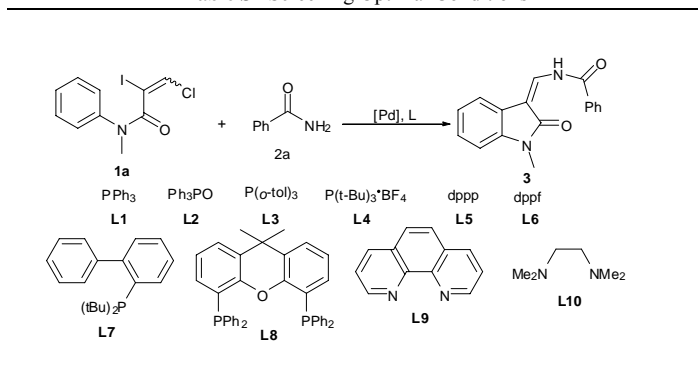

| Entry           | [Pd] (mol%)                                        | ligand     | [Ag] (equivi)                          | base                            | Yield (%) <sup>b</sup> |
|-----------------|----------------------------------------------------|------------|----------------------------------------|---------------------------------|------------------------|
| 1               | Pd(OAc) <sub>2</sub>                               | —          | AgOAc (1)                              | Cs <sub>2</sub> CO <sub>3</sub> | trace                  |
| 2               | Pd(OAc) <sub>2</sub>                               | <b>L1</b>  | AgOAc (1)                              | Cs <sub>2</sub> CO <sub>3</sub> | 20                     |
| 3               | Pd(OAc) <sub>2</sub>                               | <b>L2</b>  | AgOAc (1)                              | Cs <sub>2</sub> CO <sub>3</sub> | trace                  |
| 4               | Pd(OAc) <sub>2</sub>                               | <b>L3</b>  | AgOAc (1)                              | Cs <sub>2</sub> CO <sub>3</sub> | 30                     |
| 5               | Pd(OAc) <sub>2</sub>                               | <b>L4</b>  | AgOAc (1)                              | Cs <sub>2</sub> CO <sub>3</sub> | 21                     |
| 6               | Pd(OAc) <sub>2</sub>                               | <b>L5</b>  | AgOAc (1)                              | Cs <sub>2</sub> CO <sub>3</sub> | trace                  |
| 7               | Pd(OAc) <sub>2</sub>                               | <b>L6</b>  | AgOAc (1)                              | Cs <sub>2</sub> CO <sub>3</sub> | trace                  |
| 8               | Pd(OAc) <sub>2</sub>                               | <b>L7</b>  | AgOAc (1)                              | Cs <sub>2</sub> CO <sub>3</sub> | 30                     |
| 9               | Pd(OAc) <sub>2</sub>                               | <b>L7</b>  | AgOAc (1)                              | Na <sub>2</sub> CO <sub>3</sub> | 35                     |
| 10              | Pd(OAc) <sub>2</sub>                               | <b>L8</b>  | AgOAc (1)                              | Na <sub>2</sub> CO <sub>3</sub> | 45                     |
| 11              | Pd(OAc) <sub>2</sub>                               | <b>L9</b>  | AgOAc (1)                              | Na <sub>2</sub> CO <sub>3</sub> | 25                     |
| 12              | Pd(OAc) <sub>2</sub>                               | <b>L10</b> | AgOAc (1)                              | Na <sub>2</sub> CO <sub>3</sub> | trace                  |
| 13              | PdCl <sub>2</sub>                                  | <b>L8</b>  | AgOAc (1)                              | Na <sub>2</sub> CO <sub>3</sub> | 67                     |
| 14              | Pd(PPh <sub>3</sub> ) <sub>2</sub> Cl <sub>2</sub> | <b>L8</b>  | AgOAc (1)                              | Na <sub>2</sub> CO <sub>3</sub> | 65                     |
| 15              | Pd(PPh <sub>3</sub> ) <sub>4</sub>                 | <b>L8</b>  | AgOAc (1)                              | Na <sub>2</sub> CO <sub>3</sub> | 66                     |
| 16              | Pd(dba) <sub>2</sub>                               | <b>L8</b>  | AgOAc (1)                              | Na <sub>2</sub> CO <sub>3</sub> | 68                     |
| 17              | Pd(dba) <sub>2</sub>                               | <b>L8</b>  | CF <sub>3</sub> CO <sub>2</sub> Ag (1) | Na <sub>2</sub> CO <sub>3</sub> | 46                     |
| 18              | Pd(dba) <sub>2</sub>                               | <b>L8</b>  | Ag <sub>2</sub> O (1)                  | Na <sub>2</sub> CO <sub>3</sub> | 56                     |
| 19              | Pd(dba) <sub>2</sub>                               | <b>L8</b>  | Ag <sub>2</sub> CO <sub>3</sub> (1)    | Na <sub>2</sub> CO <sub>3</sub> | 50                     |
| 20              | Pd(dba) <sub>2</sub>                               | <b>L8</b>  | AgOAc (1.5)                            | Na <sub>2</sub> CO <sub>3</sub> | 79                     |
| 21              | Pd(dba) <sub>2</sub>                               | <b>L8</b>  | AgOAc (2)                              | Na <sub>2</sub> CO <sub>3</sub> | 85                     |
| 22              | Pd(dba) <sub>2</sub>                               | <b>L8</b>  | AgOAc (3)                              | Na <sub>2</sub> CO <sub>3</sub> | 80                     |
| 23 <sup>c</sup> | Pd(dba) <sub>2</sub>                               | <b>L8</b>  | AgOAc (1)                              | Na <sub>2</sub> CO <sub>3</sub> | 86                     |
| 24 <sup>d</sup> | Pd(dba) <sub>2</sub>                               | <b>L8</b>  | AgOAc (1)                              | Na <sub>2</sub> CO <sub>3</sub> | 72                     |

|                  |                      |           |           |                                 |         |
|------------------|----------------------|-----------|-----------|---------------------------------|---------|
| 25 <sup>c</sup>  | Pd(dba) <sub>2</sub> | <b>L8</b> | AgOAc (1) | Et <sub>3</sub> N               | trace   |
| 26 <sup>c</sup>  | Pd(dba) <sub>2</sub> | <b>L8</b> | AgOAc (1) | NaHCO <sub>3</sub>              | 30      |
| 27 <sup>ce</sup> | Pd(dba) <sub>2</sub> | <b>L8</b> | AgOAc (1) | Na <sub>2</sub> CO <sub>3</sub> | 83      |
| 28 <sup>cf</sup> | Pd(dba) <sub>2</sub> | <b>L8</b> | AgOAc (1) | Na <sub>2</sub> CO <sub>3</sub> | 58      |
| 29 <sup>cg</sup> | Pd(dba) <sub>2</sub> | <b>L8</b> | AgOAc (1) | —                               | 0       |
| 30 <sup>ch</sup> | Pd(dba) <sub>2</sub> | <b>L8</b> | AgOAc (1) | Na <sub>2</sub> CO <sub>3</sub> | mixture |

<sup>a</sup> Reaction conditions: **1a** (0.3 mmol), **2a** (0.45 mmol), [Pd] (10 mol %), ligand (10 mol %), [Ag] (1 equiv), base (2 equiv), and solvent (2 mL) at 80 °C for 8 h. <sup>b</sup> Isolated yield. <sup>c</sup> At 50 °C for 13 h. <sup>d</sup> At room temperature for 96 h. <sup>e</sup> In THF. <sup>f</sup> 5 mol % of Pd(dba)<sub>2</sub> was added. <sup>g</sup> Without base. <sup>h</sup> Without Ag salt.

### (B) Analytical data for **1** and **3-24**

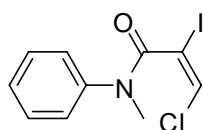

#### **3-Chloro-2-iodo-N-methyl-N-phenylacrylamide (1a):**<sup>1</sup>

White solid, mp 114.5-116.2 °C (uncorrected); <sup>1</sup>H NMR (500 MHz) δ: 7.40-7.35 (m, 5H), 6.26 (s, 1H), 3.35 (s, 3H); <sup>13</sup>C NMR (125 MHz) δ: 164.1, 142.0, 129.2, 128.4, 126.5, 122.4, 86.9, 37.5; IR (KBr, cm<sup>-1</sup>): 1648; LRMS (EI, 70 eV) *m/z* (%): 323 (M<sup>+</sup>+2, 0.3), 321 (M<sup>+</sup>, 0.9), 194 (100), 159 (55); HRMS *m/z* (EI) calcd for C<sub>10</sub>H<sub>9</sub>ClINO (M<sup>+</sup>) 320.9417, found 320.9413.

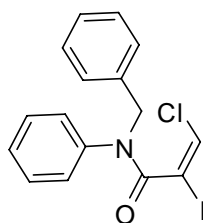

#### **N-Benzyl-3-chloro-2-iodo-N-phenylacrylamide (1b):**<sup>1</sup>

Colorless oil; <sup>1</sup>H NMR (500 MHz) δ: 7.32-7.16 (m, 10H), 6.22 (s, 1H), 4.93 (s, 2H); <sup>13</sup>C NMR (125 MHz) δ: 164.0, 140.0, 136.3, 128.8, 128.6, 128.5, 128.4, 127.5, 122.1, 86.7, 53.1; IR (KBr, cm<sup>-1</sup>): 1646; LRMS (EI, 70 eV) *m/z* (%): 399 (M<sup>+</sup>+2, 0.4), 397 (M<sup>+</sup>, 1), 361

(9), 216 (11), 91 (100); HRMS  $m/z$  (EI) calcd for  $C_{16}H_{13}ClINO$  ( $M^+$ ) 396.9730, found 396.9727.

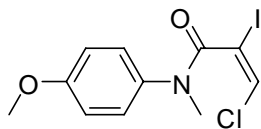

**3-Chloro-2-iodo-N-(4-methoxyphenyl)-N-methylacrylamide (1c):<sup>1</sup>**

Colorless oil;  $^1H$  NMR (500 MHz)  $\delta$ : 7.16 (d,  $J = 9.0$  Hz, 2H), 6.84 (d,  $J = 10.0$  Hz, 2H), 3.76 (s, 3H), 3.24 (s, 3H);  $^{13}C$  NMR (125 MHz)  $\delta$ : 164.3, 159.4, 134.7, 127.7, 120.0, 114.3, 87.0, 55.4, 37.6; IR (KBr,  $cm^{-1}$ ): 1650; LRMS (EI, 70 eV)  $m/z$  (%): 353 ( $M^+ + 2$ , 4), 351 ( $M^+$ , 12), 189 (83), 136 (100); HRMS  $m/z$  (EI) calcd for  $C_{11}H_{11}ClINO_2$  ( $M^+$ ) 350.9523, found 350.9520.

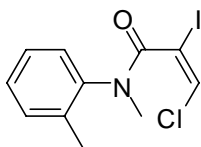

**3-Chloro-2-iodo-N-methyl-N-o-tolylacrylamide (1d):<sup>1</sup>**

Colorless oil;  $^1H$  NMR (500 MHz)  $\delta$ : 7.38-7.07 (m, 4H), 6.25 (s, 1H), 3.18 (s, 3H), 2.30 (s, 3H);  $^{13}C$  NMR (125 MHz)  $\delta$ : 164.4, 140.4, 135.2, 131.7, 129.1, 127.7, 126.8, 122.9, 86.3, 36.6, 18.6; IR (KBr,  $cm^{-1}$ ): 1646; LRMS (EI, 70 eV)  $m/z$  (%): 337 ( $M^+ + 2$ , 0.2), 335 ( $M^+$ , 0.7), 208 (100), 173 (42); HRMS  $m/z$  (EI) calcd for  $C_{11}H_{11}ClINO$  ( $M^+$ ) 334.9574, found 334.9573.

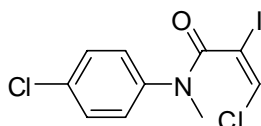

**3-Chloro-N-(4-chlorophenyl)-2-iodo-N-methylacrylamide (1e):<sup>1</sup>**

Colorless oil;  $^1\text{H}$  NMR (500 MHz)  $\delta$ : 7.37 (d,  $J = 9.0$  Hz, 2H), 7.30 (d,  $J = 9.0$  Hz, 2H), 6.28 (s, 1H), 3.32 (s, 3H);  $^{13}\text{C}$  NMR (125 MHz)  $\delta$ : 163.8, 140.3, 134.0, 129.3, 127.7, 122.5, 86.5, 37.3; IR (KBr,  $\text{cm}^{-1}$ ): 1646; LRMS (EI, 70 eV)  $m/z$  (%): 357 ( $\text{M}^+ + 2$ , 12), 355 ( $\text{M}^+$ , 39), 193 (67), 105 (100); HRMS  $m/z$  (EI) calcd for  $\text{C}_{10}\text{H}_8\text{Cl}_2\text{INO}$  ( $\text{M}^+$ ) 354.9028, found 354.9026.

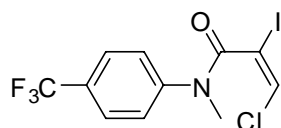

**3-Chloro-2-iodo-N-methyl-N-(4-(trifluoromethyl)phenyl)acrylamide (1f):<sup>1</sup>**

Colorless oil;  $^1\text{H}$  NMR (500 MHz)  $\delta$ : 7.65 (d,  $J = 8.0$  Hz, 2H), 7.47 (d,  $J = 8.0$  Hz, 2H), 6.31 (s, 1H), 3.36 (s, 3H);  $^{13}\text{C}$  NMR (125 MHz)  $\delta$ : 163.7, 145.0, 127.1, 126.7, 126.3 (3C), 126.2, 123.0, 86.4, 83.3, 37.2; IR (KBr,  $\text{cm}^{-1}$ ): 1659; LRMS (EI, 70 eV)  $m/z$  (%): 391 ( $\text{M}^+ + 2$ , 0.14), 389 ( $\text{M}^+$ , 0.44), 354 (3), 315 (54), 262 (100); HRMS  $m/z$  (EI) calcd for  $\text{C}_{11}\text{H}_8\text{ClI}_3\text{NO}$  ( $\text{M}^+$ ) 388.9291, found 388.9295.

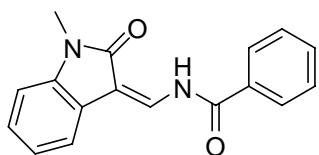

**(Z)-N-((1-Methyl-2-oxoindolin-3-ylidene)methyl)benzamide (3):**

Yellow solid, mp 160.2-162.6 °C (uncorrected);  $^1\text{H}$  NMR (500 MHz)  $\delta$ : 12.2 (d,  $J = 10.0$  Hz, 1H), 8.34 (d,  $J = 10.5$  Hz, 1H), 8.05 (d,  $J = 7.5$  Hz, 2H), 7.61 (t,  $J = 7.5$  Hz, 1H), 7.53 (t,  $J = 7.5$  Hz, 2H), 7.47 (d,  $J = 7.5$  Hz, 1H), 7.24 (d,  $J = 7.5$  Hz, 1H), 7.08 (t,  $J = 7.5$  Hz, 1H), 6.88 (d,  $J = 8.0$  Hz, 1H), 3.32 (s, 3H);  $^{13}\text{C}$  NMR (125 MHz)  $\delta$ : 169.2, 164.6, 140.8, 133.1, 131.9, 129.0, 127.9, 127.3, 122.3, 122.0, 118.6, 108.4, 108.1, 105.8, 25.8; IR (KBr,

$\text{cm}^{-1}$ ): 1686, 1636; LRMS (EI, 70 eV)  $m/z$  (%): 278 ( $\text{M}^+$ , 30), 105 (100), 77 (42); HRMS  $m/z$  (EI) calcd for  $\text{C}_{17}\text{H}_{14}\text{N}_2\text{O}_2$  ( $\text{M}^+$ ) 278.1055, found 278.1052.

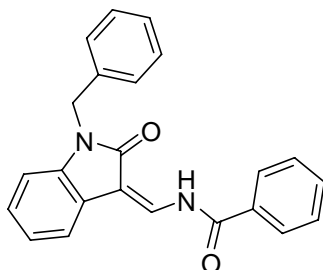

**(Z)-N-((1-Benzyl-2-oxoindolin-3-ylidene)methyl)benzamide (4):**

Yellow solid, mp 178.1-180.9 °C (uncorrected);  $^1\text{H}$  NMR (500 MHz)  $\delta$ : 12.21 (d,  $J = 10.5$  Hz, 1H), 8.41 (d,  $J = 11.0$  Hz, 1H), 8.07 (d,  $J = 7.5$  Hz, 2H), 7.61 (t,  $J = 7.5$  Hz, 1H), 7.54-7.48 (m, 3H), 7.31 (d,  $J = 5.5$  Hz, 4H), 7.27-7.25 (m, 1H), 7.16-7.13 (m, 1H), 7.07-7.04 (m, 1H), 6.80 (d,  $J = 9.0$  Hz, 1H), 5.03 (s, 3H);  $^{13}\text{C}$  NMR (125 MHz)  $\delta$ : 169.2, 164.6, 139.9, 135.8, 133.1, 131.8, 128.9, 128.8, 127.9, 127.6, 127.2, 127.1, 122.3, 122.1, 118.6, 109.3, 107.8, 43.3; 1638; LRMS (EI, 70 eV)  $m/z$  (%): 354 ( $\text{M}^+$ , 43), 105 (100), 77 (33); HRMS  $m/z$  (EI) calcd for  $\text{C}_{23}\text{H}_{18}\text{N}_2\text{O}_2$  ( $\text{M}^+$ ) 354.1368, found 354.1366.

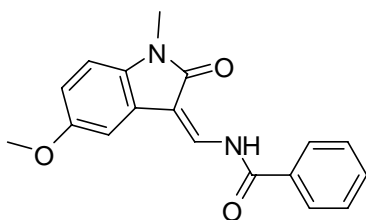

**(Z)-N-((5-Methoxy-1-methyl-2-oxoindolin-3-ylidene)methyl)benzamide (5):**

Yellow solid, mp 170.2-172.4 °C (uncorrected);  $^1\text{H}$  NMR (500 MHz)  $\delta$ : 12.20 (d,  $J = 10.5$  Hz, 1H), 8.30 (d,  $J = 10.5$  Hz, 1H), 8.04 (d,  $J = 7.5$  Hz, 2H), 7.61 (t,  $J = 7.5$  Hz, 1H), 7.22 (t,  $J = 7.5$  Hz, 2H), 7.05 (d,  $J = 10.5$  Hz, 1H), 6.79-6.75 (m, 2H), 3.81 (s, 3H), 3.28 (s, 3H);  $^{13}\text{C}$  NMR (125 MHz)  $\delta$ : 168.9, 164.5, 155.8, 134.7, 133.1, 131.8, 131.3, 128.9, 127.9, 122.9, 112.8, 108.7, 108.4, 104.8, 55.8, 25.7; IR (KBr,  $\text{cm}^{-1}$ ): 1671, 1635; LRMS (EI, 70

eV)  $m/z$  (%): 308 ( $M^+$ , 46), 105 (100), 77 (37); HRMS  $m/z$  (EI) calcd for  $C_{18}H_{16}N_2O_3$  ( $M^+$ ) 308.1161, found 308.1163.

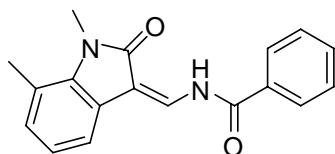

**(Z)-N-((1,7-Dimethyl-2-oxoindolin-3-ylidene)methyl)benzamide (6):**

Yellow solid, mp 186.8-188.6 °C (uncorrected);  $^1H$  NMR (500 MHz)  $\delta$ : 12.21 (d,  $J$  = 10.0 Hz, 1H), 8.30 (d,  $J$  = 11.0 Hz, 1H), 8.05 (d,  $J$  = 8.0 Hz, 2H), 7.61 (d,  $J$  = 9.0 Hz, 1H), 7.53 (t,  $J$  = 8.0 Hz, 2H), 7.34-7.31 (m, 1H), 6.95 (d,  $J$  = 5.0 Hz, 2H), 3.59 (s, 3H), 2.57 (s, 3H);  $^{13}C$  NMR (125 MHz)  $\delta$ : 169.5, 164.5, 138.6, 133.0, 131.9, 130.9, 130.8, 128.9, 127.9, 122.4, 122.2, 120.1, 116.4, 107.9, 28.9, 18.9; IR (KBr,  $cm^{-1}$ ): 1687, 1618; LRMS (EI, 70 eV)  $m/z$  (%): 292 ( $M^+$ , 38), 105 (100), 77 (33); HRMS  $m/z$  (EI) calcd for  $C_{18}H_{16}N_2O_2$  ( $M^+$ ) 292.1212, found 292.1211.

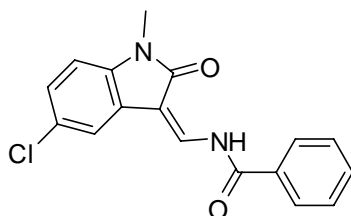

**(Z)-N-((5-Chloro-1-methyl-2-oxoindolin-3-ylidene)methyl)benzamide (7):**

Yellow solid, mp 188.3-190.8 °C (uncorrected);  $^1H$  NMR (500 MHz)  $\delta$ : 12.15 (d,  $J$  = 10.5 Hz, 1H), 8.33 (d,  $J$  = 11.0 Hz, 1H), 8.03 (d,  $J$  = 7.5 Hz, 2H), 7.62 (t,  $J$  = 7.5 Hz, 1H), 7.53 (t,  $J$  = 7.5 Hz, 2H), 7.42 (s, 1H), 7.20-7.18 (m, 1H), 6.79 (d,  $J$  = 8.5 Hz, 1H), 3.31 (s, 3H);  $^{13}C$  NMR (125 MHz)  $\delta$ : 168.9, 164.5, 139.1, 133.3, 132.6, 131.6, 129.1, 127.9, 126.9, 123.5, 118.7, 109.2, 107.0, 25.9; IR (KBr,  $cm^{-1}$ ): 1679, 1626; LRMS (EI, 70 eV)  $m/z$  (%):



314 ( $M^{+2}$ , 10), 312 ( $M^{+}$ , 26), 105 (100), 77 (40); HRMS  $m/z$  (EI) calcd for  $C_{17}H_{13}ClN_2O_2$  ( $M^{+}$ ) 312.0666, found 312.0662.

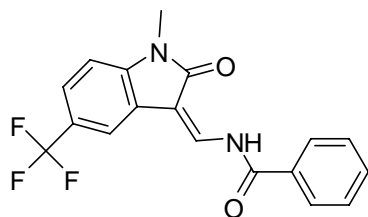

**(Z)-N-((1-Methyl-2-oxo-5-(trifluoromethyl)indolin-3-ylidene)methyl)benzamide**

**(8):**

Yellow solid, mp 224.3-226.4 °C (uncorrected);  $^1H$  NMR (500 MHz)  $\delta$ : 12.14 (d,  $J$  = 10.5 Hz, 1H), 8.45 (d,  $J$  = 11.0 Hz, 1H), 8.05 (d,  $J$  = 7.5 Hz, 2H), 7.71 (s, 1H), 7.63 (t,  $J$  = 7.5 Hz, 1H), 7.56-7.51 (m, 3H), 6.96 (d,  $J$  = 8.0 Hz, 1H), 3.37 (s, 3H);  $^{13}C$  NMR (125 MHz)  $\delta$ : 169.2, 164.5, 142.9, 133.4, 133.1, 131.5, 129.1, 127.9, 124.4, 124.3, 122.4, 115.5, 115.4, 108.1, 106.6, 25.9; IR (KBr,  $cm^{-1}$ ): 1683, 1635; LRMS (EI, 70 eV)  $m/z$  (%): 346 ( $M^{+}$ , 28), 105 (100), 77 (34); HRMS  $m/z$  (EI) calcd for  $C_{18}H_{13}F_3N_2O_2$  ( $M^{+}$ ) 346.0929, found 346.0927.

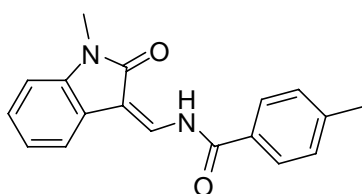

**(Z)-4-Methyl-N-((1-methyl-2-oxoindolin-3-ylidene)methyl)benzamide (9):**

Yellow solid, mp 188.2-190.1 °C (uncorrected);  $^1H$  NMR (500 MHz)  $\delta$ : 12.13 (d,  $J$  = 10.5 Hz, 1H), 8.35 (d,  $J$  = 10.5 Hz, 1H), 7.95 (d,  $J$  = 8.0 Hz, 2H), 7.47 (t,  $J$  = 7.0 Hz, 1H), 7.32 (d,  $J$  = 8.0 Hz, 1H), 7.24 (d,  $J$  = 7.5 Hz, 2H), 7.08 (t,  $J$  = 7.5 Hz, 1H), 6.89 (d,  $J$  = 7.5 Hz, 1H), 3.33 (s, 3H), 2.44 (s, 3H);  $^{13}C$  NMR (125 MHz)  $\delta$ : 169.2, 164.5, 143.9, 140.6, 131.6, 129.6, 129.0, 127.9, 127.1, 122.2, 122.1, 118.4, 108.3, 107.7, 25.7, 21.6; IR (KBr,

cm<sup>-1</sup>): 1675, 1630; LRMS (EI, 70 eV) *m/z* (%): 292 (M<sup>+</sup>, 35), 119 (100), 91 (43); HRMS *m/z* (EI) calcd for C<sub>18</sub>H<sub>16</sub>N<sub>2</sub>O<sub>2</sub> (M<sup>+</sup>) 292.1212, found 292.1210.

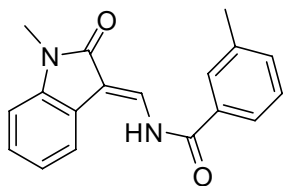

**(Z)-3-Methyl-N-((1-methyl-2-oxoindolin-3-ylidene)methyl)benzamide (10):**

Yellow solid, mp 136.5-138.1 °C (uncorrected); <sup>1</sup>H NMR (500 MHz) δ: 12.10 (d, *J* = 10.5 Hz, 1H), 8.35 (d, *J* = 10.5 Hz, 1H), 7.86-7.82 (m, 2H), 7.47 (t, *J* = 7.5 Hz, 1H), 7.42-7.41 (m, 1H), 7.27-7.23 (m, 1H), 7.10-7.07 (m, 1H), 6.89 (d, *J* = 8.0 Hz, 1H), 3.33 (s, 3H), 2.46 (s, 3H); <sup>13</sup>C NMR (125 MHz) δ: 169.1, 164.8, 140.7, 138.9, 133.9, 131.8, 131.4, 128.8, 128.6, 127.2, 124.9, 122.3, 122.0, 118.5, 108.3, 107.9, 25.7, 21.4; IR (KBr, cm<sup>-1</sup>): 1680, 1631; LRMS (EI, 70 eV) *m/z* (%): 292 (M<sup>+</sup>, 35), 119 (100), 91 (42); HRMS *m/z* (EI) calcd for C<sub>18</sub>H<sub>16</sub>N<sub>2</sub>O<sub>2</sub> (M<sup>+</sup>) 292.1212, found 292.1211.

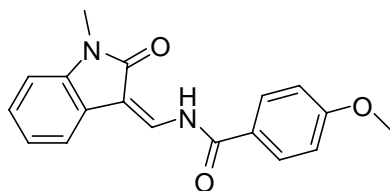

**(Z)-4-Methoxy-N-((1-methyl-2-oxoindolin-3-ylidene)methyl)benzamide (11):**

Yellow solid, mp 128.9-130.6 °C (uncorrected); <sup>1</sup>H NMR (500 MHz) δ: 12.12 (d, *J* = 10.5 Hz, 1H), 8.35 (d, *J* = 11.0 Hz, 2H), 8.02 (d, *J* = 9.0 Hz, 2H), 7.47 (d, *J* = 7.5 Hz, 1H), 7.24 (d, *J* = 7.5 Hz, 1H), 7.09 (t, *J* = 7.5 Hz, 1H), 7.00 (d, *J* = 8.5 Hz, 1H), 6.89 (d, *J* = 8.5 Hz, 1H), 3.89 (s, 3H), 3.34 (s, 3H); <sup>13</sup>C NMR (125 MHz) δ: 169.2, 163.9, 163.5, 140.6, 131.8, 130.0, 127.0, 124.1, 122.2, 122.1, 118.4, 114.2, 108.3, 107.4, 55.5, 25.7; IR (KBr,

cm<sup>-1</sup>): 1687, 1606; LRMS (EI, 70 eV) *m/z* (%): 308 (M<sup>+</sup>, 32), 135 (100), 77 (17); HRMS *m/z* (EI) calcd for C<sub>18</sub>H<sub>16</sub>N<sub>2</sub>O<sub>3</sub> (M<sup>+</sup>) 308.1161, found 308.1163.

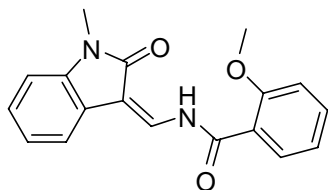

**(Z)-2-Methoxy-N-((1-methyl-2-oxoindolin-3-ylidene)methyl)benzamide (12):**

Yellow solid, mp 202.2-204.1 °C (uncorrected); <sup>1</sup>H NMR (500 MHz) δ: 12.73 (d, *J* = 11.0 Hz, 1H), 8.40 (d, *J* = 10.5 Hz, 1H), 8.29-8.28 (m, 1H), 7.56-7.52 (m, 1H), 7.46 (d, *J* = 7.5 Hz, 1H), 7.22 (t, *J* = 7.5 Hz, 1H), 7.11 (d, *J* = 7.5 Hz, 1H), 7.09-7.04 (m, 2H), 6.84 (d, *J* = 7.5 Hz, 1H), 4.19 (s, 3H), 3.30 (s, 3H); <sup>13</sup>C NMR (125 MHz) δ: 168.1, 163.8, 158.5, 140.8, 134.5, 132.9, 130.5, 126.9, 122.6, 121.8, 121.4, 119.4, 118.2, 111.6, 107.9, 107.8, 55.8, 25.6; IR (KBr, cm<sup>-1</sup>): 1687, 1622; LRMS (EI, 70 eV) *m/z* (%): 308 (M<sup>+</sup>, 19), 135 (55), 43 (100); HRMS *m/z* (EI) calcd for C<sub>18</sub>H<sub>16</sub>N<sub>2</sub>O<sub>3</sub> (M<sup>+</sup>) 308.1161, found 308.1160.

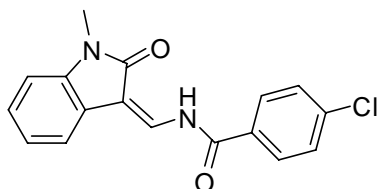

**(Z)-4-Chloro-N-((1-methyl-2-oxoindolin-3-ylidene)methyl)benzamide (13):**

Yellow solid, mp 180.6-182.2 °C (uncorrected); <sup>1</sup>H NMR (500 MHz) δ: 12.19 (d, *J* = 10.5 Hz, 1H), 8.31 (d, *J* = 10.5 Hz, 1H), 7.99-7.97 (m, 2H), 7.51-7.46 (m, 3H), 7.28-7.24 (m, 1H), 7.09 (d, *J* = 7.5 Hz, 1H), 6.90 (d, *J* = 7.5 Hz, 1H), 3.33 (m, 3H); <sup>13</sup>C NMR (125 MHz) δ: 169.2, 163.5, 140.8, 139.6, 131.1, 130.3, 129.3, 127.4, 122.4, 121.8, 118.6, 108.4, 108.4, 25.7; IR (KBr, cm<sup>-1</sup>): 1679, 1622; LRMS (EI, 70 eV) *m/z* (%): 314 (M<sup>+</sup>+2, 8), 312

(M<sup>+</sup>, 26), 105 (100), 77 (34); HRMS *m/z* (EI) calcd for C<sub>17</sub>H<sub>13</sub>ClN<sub>2</sub>O<sub>2</sub> (M<sup>+</sup>) 312.0666, found 312.0663.

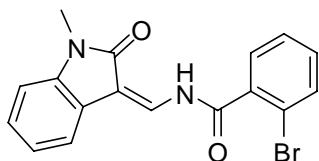

**(Z)-2-Bromo-N-((1-methyl-2-oxoindolin-3-ylidene)methyl)benzamide (14):**

Yellow solid, mp 182.6-184.3 °C (uncorrected); <sup>1</sup>H NMR (500 MHz) δ: 11.58 (d, *J* = 10.5 Hz, 1H), 8.28 (d, *J* = 11.0 Hz, 1H), 7.69-7.66 (m, 2H), 7.47-7.42 (m, 2H), 7.39-7.25 (m, 1H), 7.09 (t, *J* = 7.5 Hz, 1H), 6.88 (d, *J* = 7.5 Hz, 1H), 3.28 (s, 3H); <sup>13</sup>C NMR (125 MHz) δ: 168.6, 165.5, 140.9, 135.5, 134.1, 132.5, 129.9, 127.7, 127.5, 122.3, 121.8, 120.0, 118.6, 108.8, 108.3, 25.7; IR (KBr, cm<sup>-1</sup>): 1683, 1634; LRMS (EI, 70 eV) *m/z* (%): 356 (M<sup>+</sup>, 58), 358 (58) 183 (100), 155 (20); HRMS *m/z* (EI) calcd for C<sub>17</sub>H<sub>13</sub>BrN<sub>2</sub>O<sub>2</sub> (M<sup>+</sup>) 356.0160, found 356.0164.

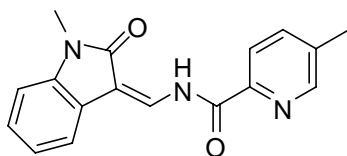

**(Z)-5-Methyl-N-((1-methyl-2-oxoindolin-3-ylidene)methyl)picolinamide (15):**

Yellow solid, mp 191.6-193.0 °C (uncorrected); <sup>1</sup>H NMR (500 MHz) δ: 12.20 (d, *J* = 10.5 Hz, 1H), 9.19 (d, *J* = 7.5 Hz, 1H), 8.32 (d, *J* = 7.5 Hz, 1H), 8.18-8.16 (m, 1H), 7.48 (d, *J* = 7.5 Hz, 1H), 7.32-7.25 (m, 1H), 7.11-7.08 (m, 1H), 6.90 (d, *J* = 8.0 Hz, 1H), 3.33 (s, 3H), 2.67 (s, 3H); <sup>13</sup>C NMR (125 MHz) δ: 169.1, 163.5, 163.2, 149.2, 140.8, 135.3, 130.7, 127.5, 124.9, 123.2, 122.4, 121.7, 118.7, 108.6, 108.4, 25.8, 24.8; IR (KBr, cm<sup>-1</sup>): 1687, 1634; LRMS (EI, 70 eV) *m/z* (%): 293 (M<sup>+</sup>, 48), 120 (100), 92 (38); HRMS *m/z* (EI) calcd for C<sub>17</sub>H<sub>15</sub>N<sub>3</sub>O<sub>2</sub> (M<sup>+</sup>) 293.1164, found 293.1161.

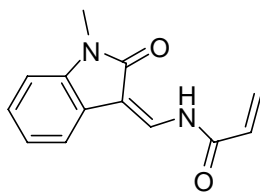

**(Z)-N-((1-Methyl-2-oxoindolin-3-ylidene)methyl)acrylamide (16):**

Yellow solid, mp 172.7-174.3 °C (uncorrected); <sup>1</sup>H NMR (500 MHz) δ: 11.28 (d, *J* = 9.5 Hz, 1H), 8.20 (d, *J* = 11.0 Hz, 1H), 7.44 (d, *J* = 7.5 Hz, 1H), 7.27-7.24 (m, 1H), 7.08 (t, *J* = 7.5 Hz, 1H), 6.88 (d, *J* = 8.0 Hz, 1H), 6.53 (d, *J* = 17.5 Hz, 1H), 6.36-5.94 (m, 1H), 5.93 (d, *J* = 10.5 Hz, 1H), 3.30 (s, 3H); <sup>13</sup>C NMR (125 MHz) δ: 168.9, 163.4, 140.9, 130.6, 130.2, 129.8, 127.4, 122.3, 121.9, 118.6, 108.4, 108.1, 25.7; IR (KBr, cm<sup>-1</sup>): 1687, 1634; LRMS (EI, 70 eV) *m/z* (%): 228 (M<sup>+</sup>, 63), 174 (100), 55 (62); HRMS *m/z* (EI) calcd for C<sub>13</sub>H<sub>12</sub>N<sub>2</sub>O<sub>2</sub> (M<sup>+</sup>) 228.0899, found 228.0896.

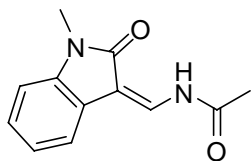

**(Z)-N-((1-Methyl-2-oxoindolin-3-ylidene)methyl)acetamide (17):<sup>2</sup>**

Yellow solid, mp 181.6-183.2 °C (uncorrected); <sup>1</sup>H NMR (500 MHz) δ: 11.02 (d, *J* = 9.0 Hz, 1H), 8.10 (d, *J* = 11.0 Hz, 1H), 7.24 (t, *J* = 7.5 Hz, 1H), 7.06 (t, *J* = 7.5 Hz, 1H), 6.87 (d, *J* = 8.0 Hz, 1H), 3.29 (s, 3H), 2.25 (s, 3H); <sup>13</sup>C NMR (125 MHz) δ: 168.8, 168.6, 140.8, 130.5, 127.2, 122.2, 122.0, 118.4, 108.3, 107.3, 25.7, 23.7; IR (KBr, cm<sup>-1</sup>): 1687, 1626; LRMS (EI, 70 eV) *m/z* (%): 216 (M<sup>+</sup>, 41), 174 (100), 158 (38).

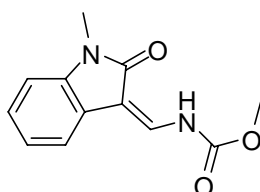

**(Z)-Methyl-N-((1-methyl-2-oxoindolin-3-ylidene)methyl)carbamate (18):**

Yellow solid, mp 150.5-152.2 °C (uncorrected); <sup>1</sup>H NMR (500 MHz) δ: 10.37 (s, 1H), 7.90 (d, *J* = 11.0 Hz, 1H), 7.39 (d, *J* = 7.5 Hz, 1H), 7.22 (t, *J* = 7.5 Hz, 1H), 7.50 (t, *J* = 7.5 Hz, 2H), 6.86 (d, *J* = 7.5 Hz, 1H), 3.87 (s, 3H), 3.28 (s, 3H); <sup>13</sup>C NMR (125 MHz) δ: 168.5, 154.1, 140.5, 132.6, 126.8, 122.0, 121.0, 117.9, 108.1, 106.0, 53.4, 25.7; IR (KBr, cm<sup>-1</sup>): 1687, 1630; LRMS (EI, 70 eV) *m/z* (%): 232 (M<sup>+</sup>, 95), 200 (100), 158 (44); HRMS *m/z* (EI) calcd for C<sub>12</sub>H<sub>12</sub>N<sub>2</sub>O<sub>3</sub> (M<sup>+</sup>) 232.0848, found 232.0850.

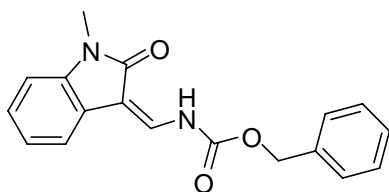

**(Z)-Benzyl-N-(1-methyl-2-oxoindolin-3-ylidene)methylcarbamate (19):**

Yellow solid, mp 129.2-131.8 °C (uncorrected); <sup>1</sup>H NMR (500 MHz) δ: 10.43 (d, *J* = 9.5 Hz, 1H), 7.90 (d, *J* = 10.5 Hz, 1H), 7.42-7.35 (m, 6H), 7.22 (t, *J* = 7.5 Hz, 1H), 7.21 (t, *J* = 7.5 Hz, 1H), 6.85 (d, *J* = 7.5 Hz, 1H), 5.27 (s, 2H), 3.27 (m, 3H); <sup>13</sup>C NMR (125 MHz) δ: 168.5, 140.5, 135.1, 132.6, 128.7, 128.6, 128.6, 128.3, 126.8, 122.0, 121.9, 117.9, 108.1, 68.2, 25.6; IR (KBr, cm<sup>-1</sup>): 1683, 1636; LRMS (EI, 70 eV) *m/z* (%): 308 (M<sup>+</sup>, 23), 247 (11), 91 (100); HRMS *m/z* (EI) calcd for C<sub>18</sub>H<sub>16</sub>N<sub>2</sub>O<sub>3</sub> (M<sup>+</sup>) 308.1161, found 308.1163.

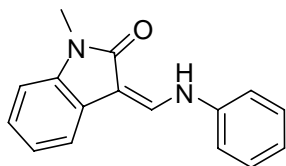

**(Z) and (E)-1-Methyl-3-((phenylamino)methylene)indolin-2-one (20):<sup>3</sup>**

*Z/E* = 1:1.8; Yellow solid, mp 143.4-145.1 °C (uncorrected); <sup>1</sup>H NMR (500 MHz) δ: 10.70 (d, *J* = 12.0 Hz, 0.53H), 8.05 (d, *J* = 14.0 Hz, 1H), 7.98 (d, *J* = 12.5 Hz, 0.55H), 7.36 (t, *J* = 7.5 Hz, 4.51H), 7.28 (t, *J* = 12.5 Hz, 1.52H), 7.21-7.02 (m, 8.06H), 6.90-6.85 (m,

1.53H), 3.34 (s, 1.69H), 3.29 (s, 3H);  $^{13}\text{C}$  NMR (125 MHz)  $\delta$ : 169.5, 168.9, 140.7, 140.1, 139.9, 138.8, 136.4, 135.9, 129.9, 129.8, 125.7, 124.4, 123.8, 123.5, 123.4, 122.1, 121.3, 121.2, 119.2, 116.1, 115.9, 107.9, 107.8, 101.8, 25.9, 25.6; IR (KBr,  $\text{cm}^{-1}$ ): 1667; LRMS (EI, 70 eV)  $m/z$  (%): 250 ( $\text{M}^+$ , 78), 158 (61), 43 (100).

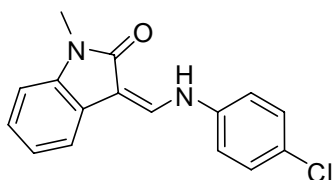

**(Z)-3-((4-Chlorophenylamino)methylene)-1-methylindolin-2-one (21):<sup>3</sup>**

Yellow solid, mp 157.7-159.5 °C (uncorrected);  $^1\text{H}$  NMR (500 MHz)  $\delta$ : 10.72 (d,  $J = 12.5$  Hz, 1H), 7.89 (d,  $J = 12.5$  Hz, 1H), 7.36 (d,  $J = 7.5$  Hz, 1H), 7.32 (t,  $J = 8.0$  Hz, 2H), 7.16 (t,  $J = 7.5$  Hz, 1H), 7.08-7.03 (m, 3H), 6.89 (d,  $J = 9.0$  Hz, 1H), 3.34 (s, 3H);  $^{13}\text{C}$  NMR (125 MHz)  $\delta$ : 169.0, 138.9, 138.6, 135.8, 129.8, 124.7, 123.1, 121.1, 117.0, 116.1, 107.9, 100.3, 25.6; IR (KBr,  $\text{cm}^{-1}$ ): 1674; LRMS (EI, 70 eV)  $m/z$  (%): 286 ( $\text{M}^+ + 2$ , 20), 284 ( $\text{M}^+$ , 61), 158 (59), 43 (100).

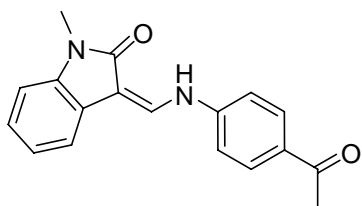

**(Z)-3-((4-Acetylphenylamino)methylene)-1-methylindolin-2-one (22):**

Yellow solid, mp 219.4-221.1 °C (uncorrected);  $^1\text{H}$  NMR (500 MHz)  $\delta$ : 10.90 (d,  $J = 12.5$  Hz, 1H), 7.98 (t,  $J = 9.0$  Hz, 3H), 7.40 (d,  $J = 7.5$  Hz, 1H), 7.21-7.15 (m, 3H), 7.06 (t,  $J = 7.5$  Hz, 1H), 6.90 (d,  $J = 7.5$  Hz, 1H), 3.34 (s, 3H), 2.58 (s, 3H);  $^{13}\text{C}$  NMR (125 MHz)  $\delta$ : 196.4, 168.9, 143.8, 139.3, 134.3, 131.9, 130.6, 125.3, 121.6, 116.6, 114.9, 108.1, 101.9,

26.3, 25.6; IR (KBr,  $\text{cm}^{-1}$ ): 1667, 1597; LRMS (EI, 70 eV)  $m/z$  (%): 292 ( $\text{M}^+$ , 36), 105 (100), 77 (34); HRMS  $m/z$  (EI) calcd for  $\text{C}_{18}\text{H}_{16}\text{N}_2\text{O}_2$  ( $\text{M}^+$ ) 292.1212, found 292.1210.

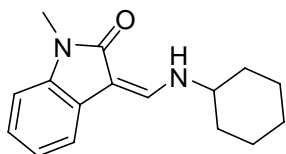

**(Z)-3-((Cyclohexylamino)methylene)-1-methylindolin-2-one (23):**

Yellow solid,  $^1\text{H}$  NMR (500 MHz)  $\delta$ : 8.82 (s, 1H), 7.50 (d,  $J = 13.5$  Hz, 1H), 7.24 (d,  $J = 7.5$  Hz, 1H), 7.07 (t,  $J = 7.5$  Hz, 1H), 6.99 (t,  $J = 7.5$  Hz, 1H), 6.87 (d,  $J = 7.5$  Hz, 1H), 3.33 (s, 2H), 2.00 (d,  $J = 5.0$  Hz, 2H), 1.83-1.81 (m, 2H), 1.47-1.34 (m, 7H);  $^{13}\text{C}$  NMR (125 MHz)  $\delta$ : 168.9, 144.6, 137.5, 124.3, 122.6, 120.7, 114.6, 107.5, 94.8, 57.4, 34.1, 25.2, 24.5; IR (KBr,  $\text{cm}^{-1}$ ): 1659; LRMS (EI, 70 eV)  $m/z$  (%): 256 ( $\text{M}^+$ , 96), 158 (27), 43 (100); HRMS  $m/z$  (EI) calcd for  $\text{C}_{16}\text{H}_{20}\text{N}_2\text{O}$  ( $\text{M}^+$ ) 256.1576, found 256.1573.

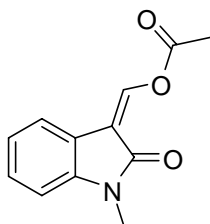

**(Z)-(1-Methyl-2-oxoindolin-3-ylidene)methyl acetate (24):**

Yellow solid; mp 152.2-153.7  $^{\circ}\text{C}$  (uncorrected);  $^1\text{H}$  NMR (500 MHz,  $\text{CDCl}_3$ )  $\delta$ : 8.46 (s, 1H), 7.67 (d,  $J = 7.5$  Hz, 1H), 7.29 (t,  $J = 7.5$  Hz, 1H), 7.06 (t,  $J = 7.5$  Hz, 1H), 6.82 (d,  $J = 7.5$  Hz, 1H), 3.24 (s, 3H), 2.40 (s, 3H);  $^{13}\text{C}$  NMR (125 MHz,  $\text{CDCl}_3$ )  $\delta$ : 168.3, 166.3, 142.7, 141.4, 129.1, 124.1, 122.2, 120.2, 113.1, 108.0, 26.0, 20.7; LRMS (EI, 70 eV)  $m/z$  (%): 217 ( $\text{M}^+$ , 6), 175 (100), 118 (60), 44 (57); HRMS  $m/z$  (EI) calcd for  $\text{C}_{12}\text{H}_{11}\text{NO}_3$  ( $\text{M}^+$ ) 217.0739, found 217.0734.



**(C) References**

- (1) The stereochemistry of the products was assigned on the basis of the chemical shift of the olefinic proton according to the authoritative  $^1\text{H}$  NMR spectra, see: Jiang, H.; Ma, S.; Zhu, G.; Lu, X. *Tetrahedron* **1996**, *52*, 10945.
- (2) (a) Long, D. R.; Richards, C. G.; Ross, M. S. F. *J. Heterocycl. Chem.* **1978**, *15*, 633. (b) Pedras, M. S. C.; Zaharia, I. L. *Org. Lett.* **2001**, *3*, 1213.
- (3) Corsico Coda, A.; Desimoni, G.; Quadrelli, P.; Righetti, P. P.; Tacconi, G. *Gazzetta Chimica Italiana* **1987**, *117*, 301 (*Chem. Abstr.* CAN 107:189491).

(D) Spectra

3-Chloro-2-iodo-N-methyl-N-phenylacrylamide (1a)

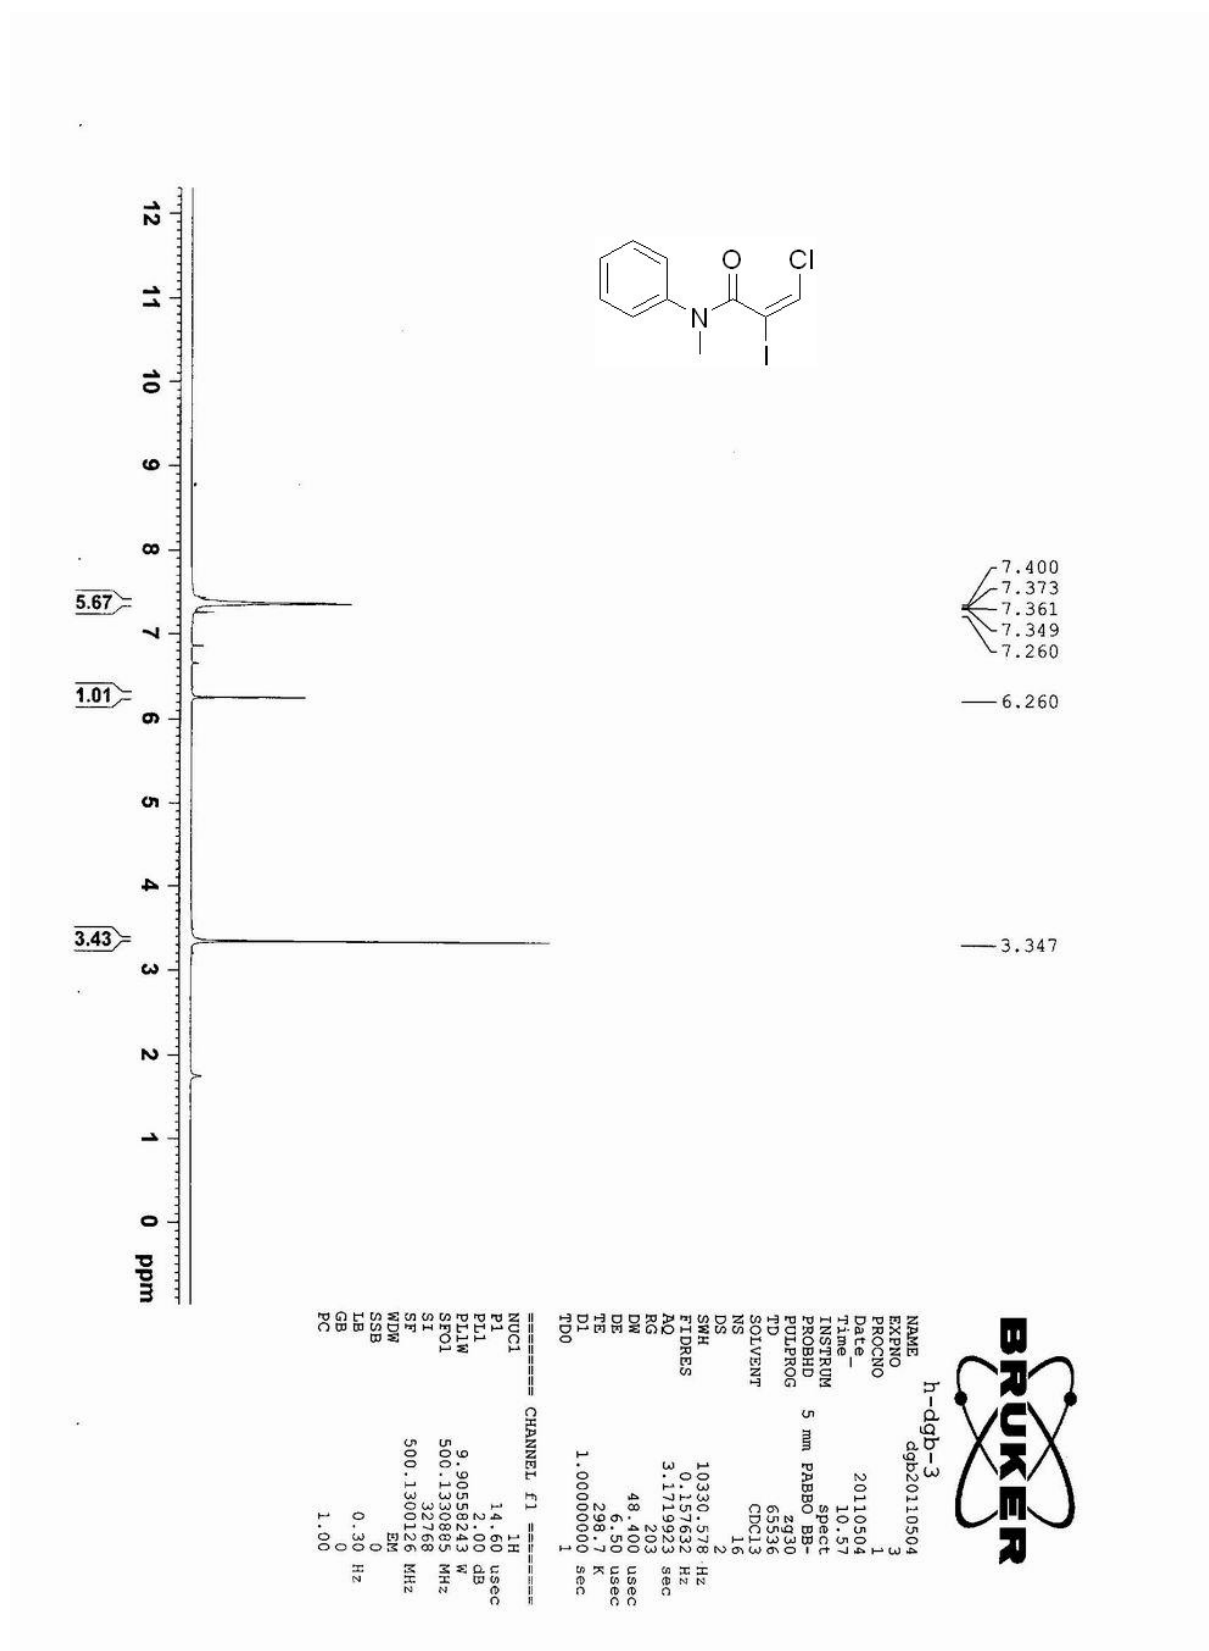

### 3-Chloro-2-iodo-N-methyl-N-phenylacrylamide (1a)

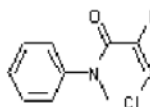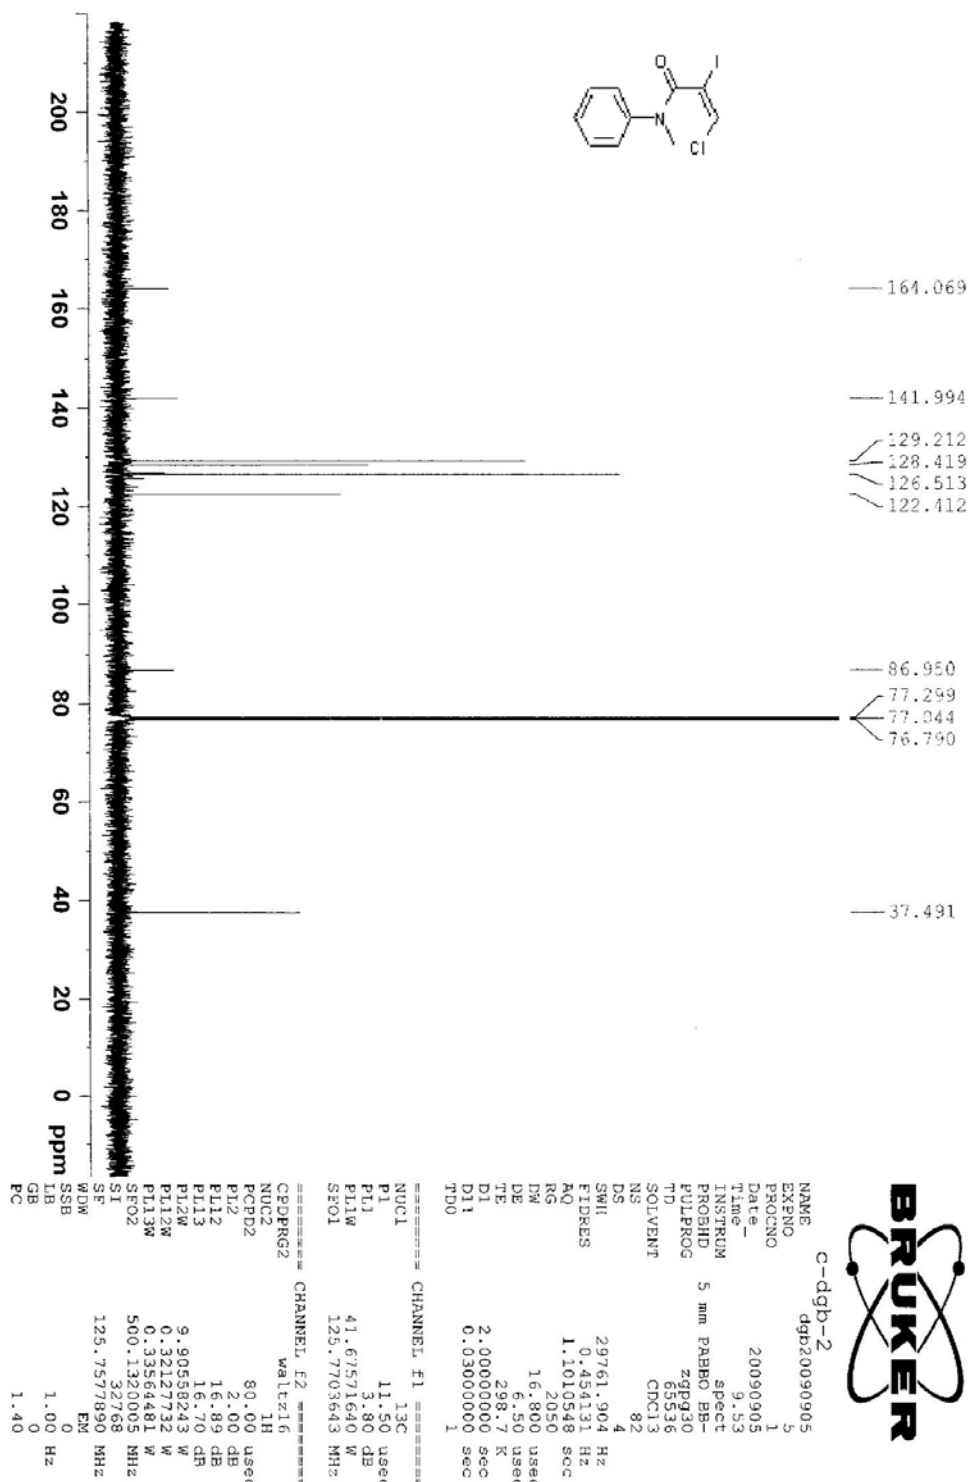

***N*-Benzyl-3-chloro-2-iodo-*N*-phenylacrylamide (1b)**

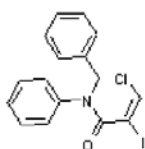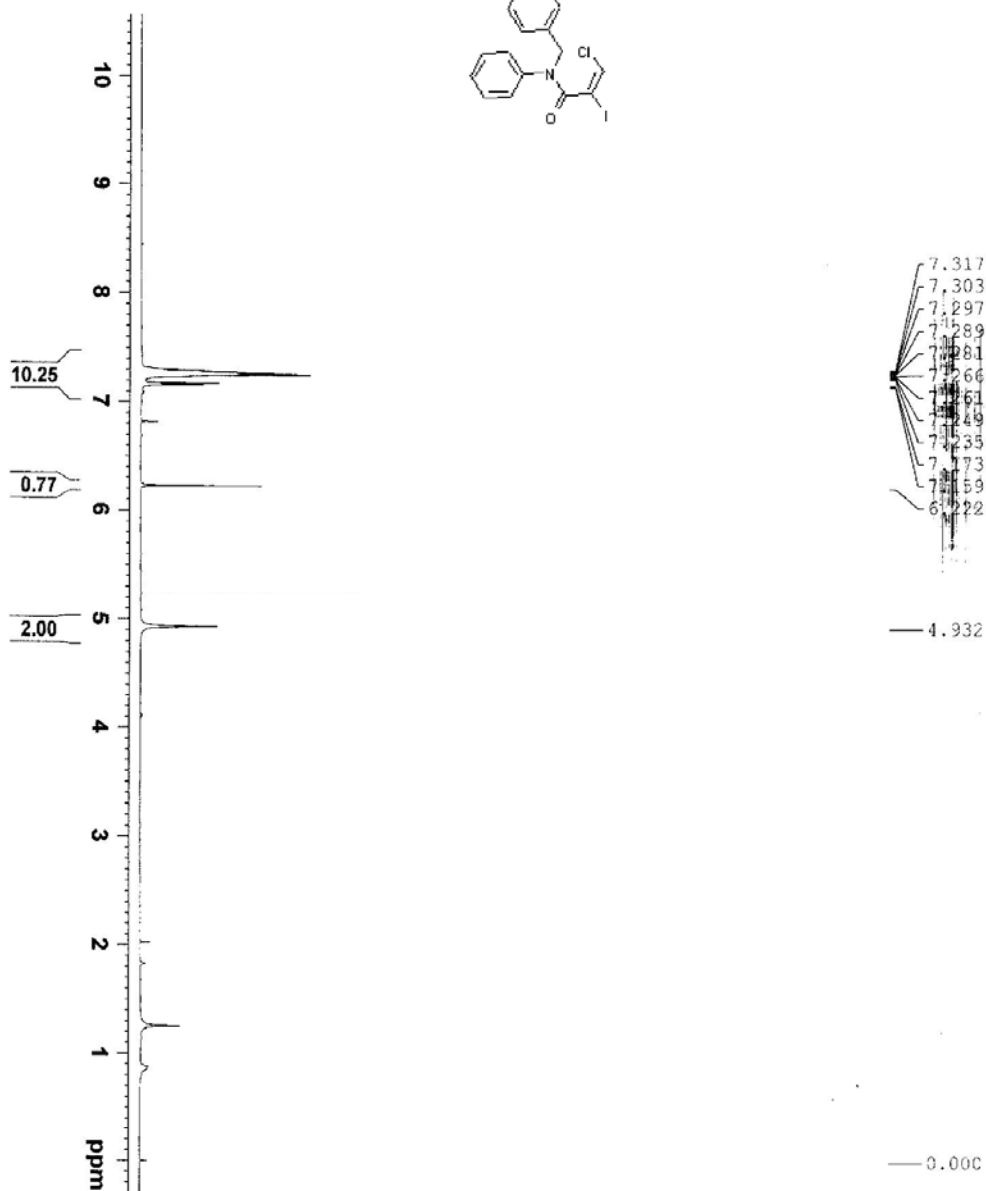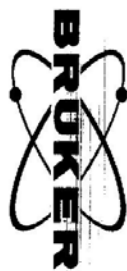

```

NAME h-dqb-4
EXPNO dongquebo1229
PROCNO 6
Date_ 20091229
Time 22.50
INSTRUM spect
PROBHD 5 mm PABBO BB-
PULPROG zg30
TD 65536
SOLVENT CDCl3
NS 16
DS 2
SWH 10330.578 Hz
FIDRES 0.157632 Hz
AQ 3.171923 sec
RG 512
DE 48.400 usec
TE 300.0 K
D1 1.00000000 sec
TD0 1

===== CHANNEL f1 =====
NUC1 1H
P1 14.40 usec
PLI 2.00 dB
PLIW 9.90558243 W
SFO1 500.1330885 MHz
SI 32768
SF 500.1300183 MHz
WDW no
SSB 0
LB 0.00 Hz
GB 0
PC 1.00
    
```

***N*-Benzyl-3-chloro-2-iodo-*N*-phenylacrylamide (1b)**

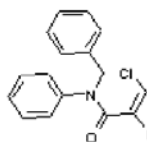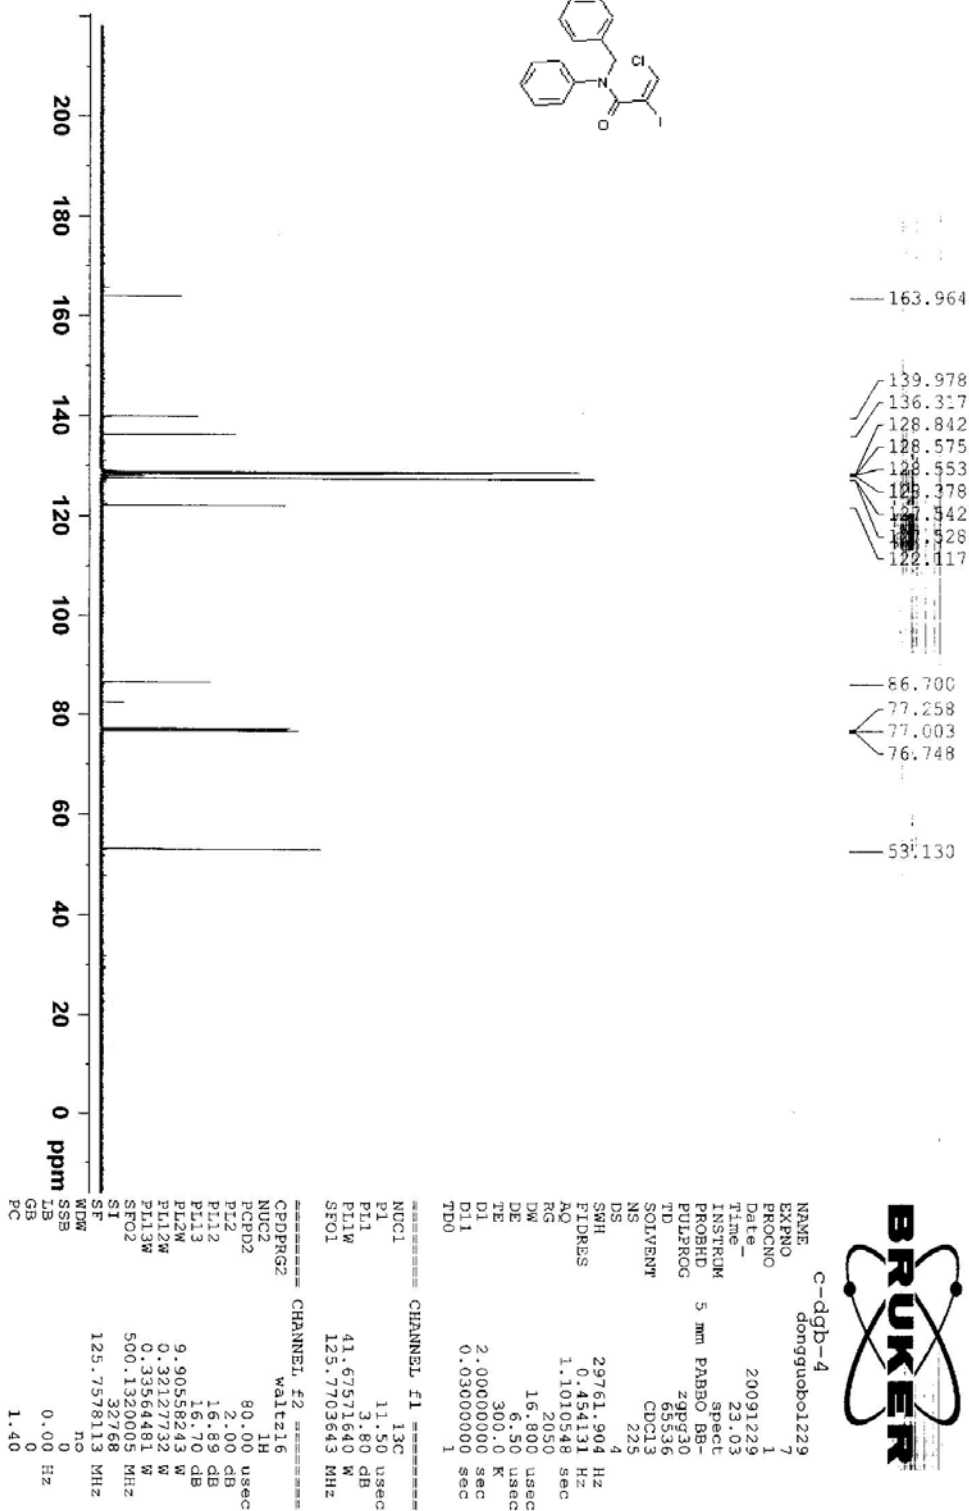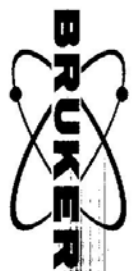

3-Chloro-2-iodo-N-(4-methoxyphenyl)-N-methylacrylamide (1c)

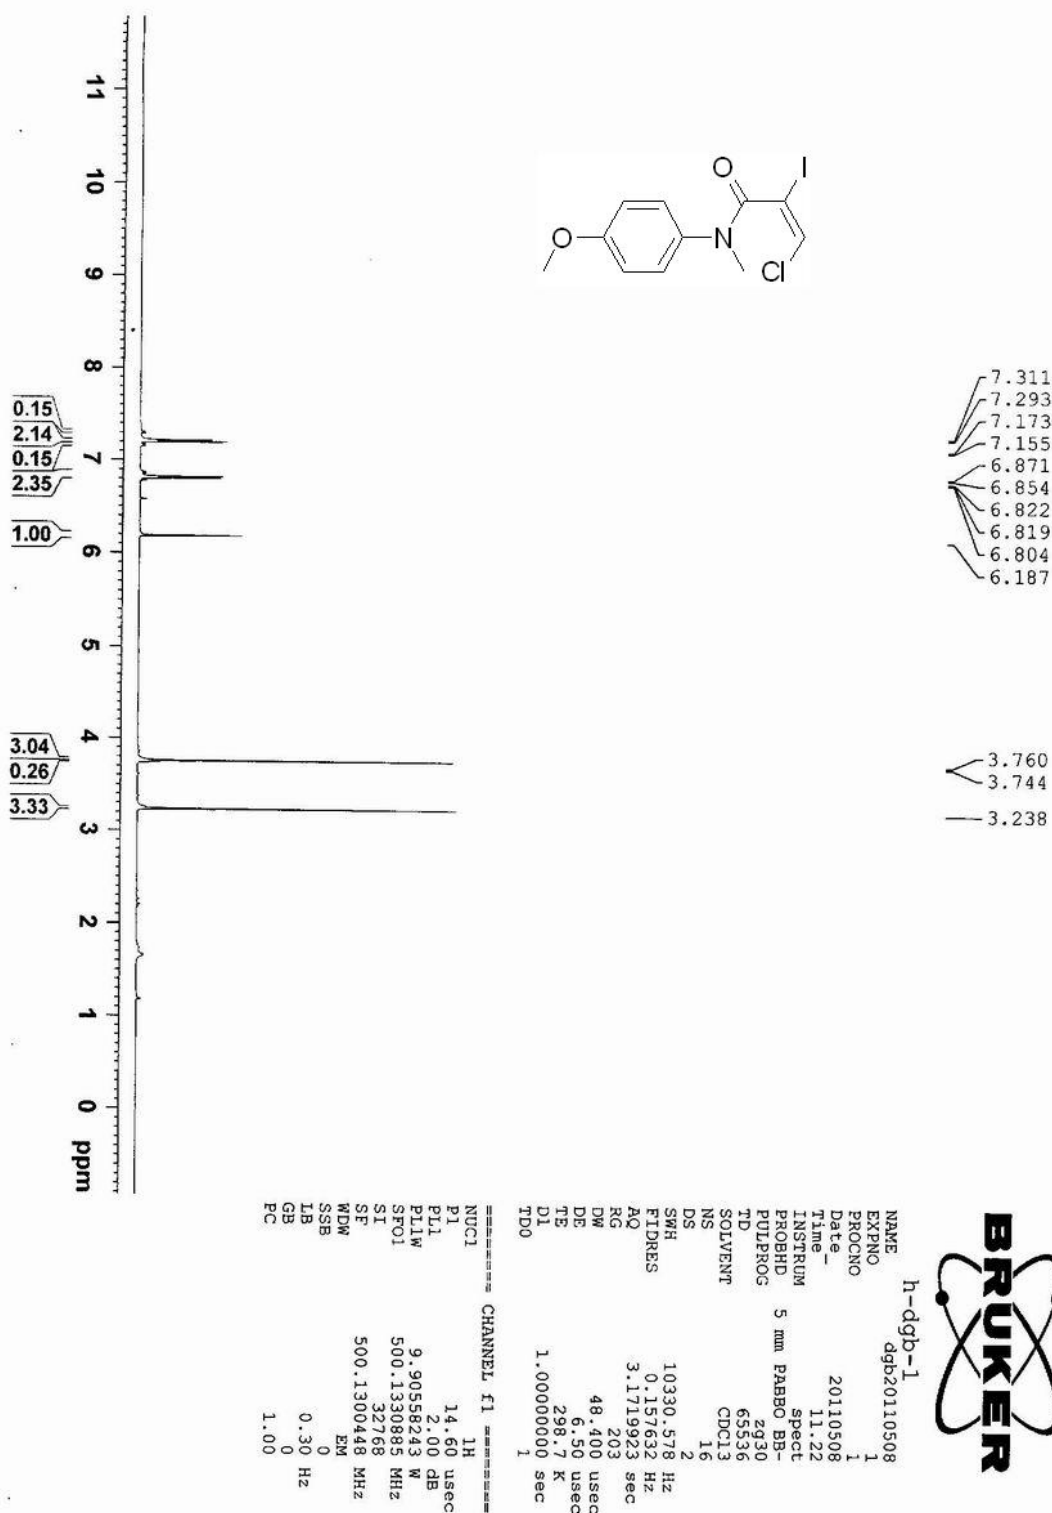

### 3-Chloro-2-iodo-N-(4-methoxyphenyl)-N-methylacrylamide (1c)

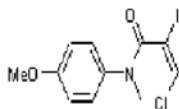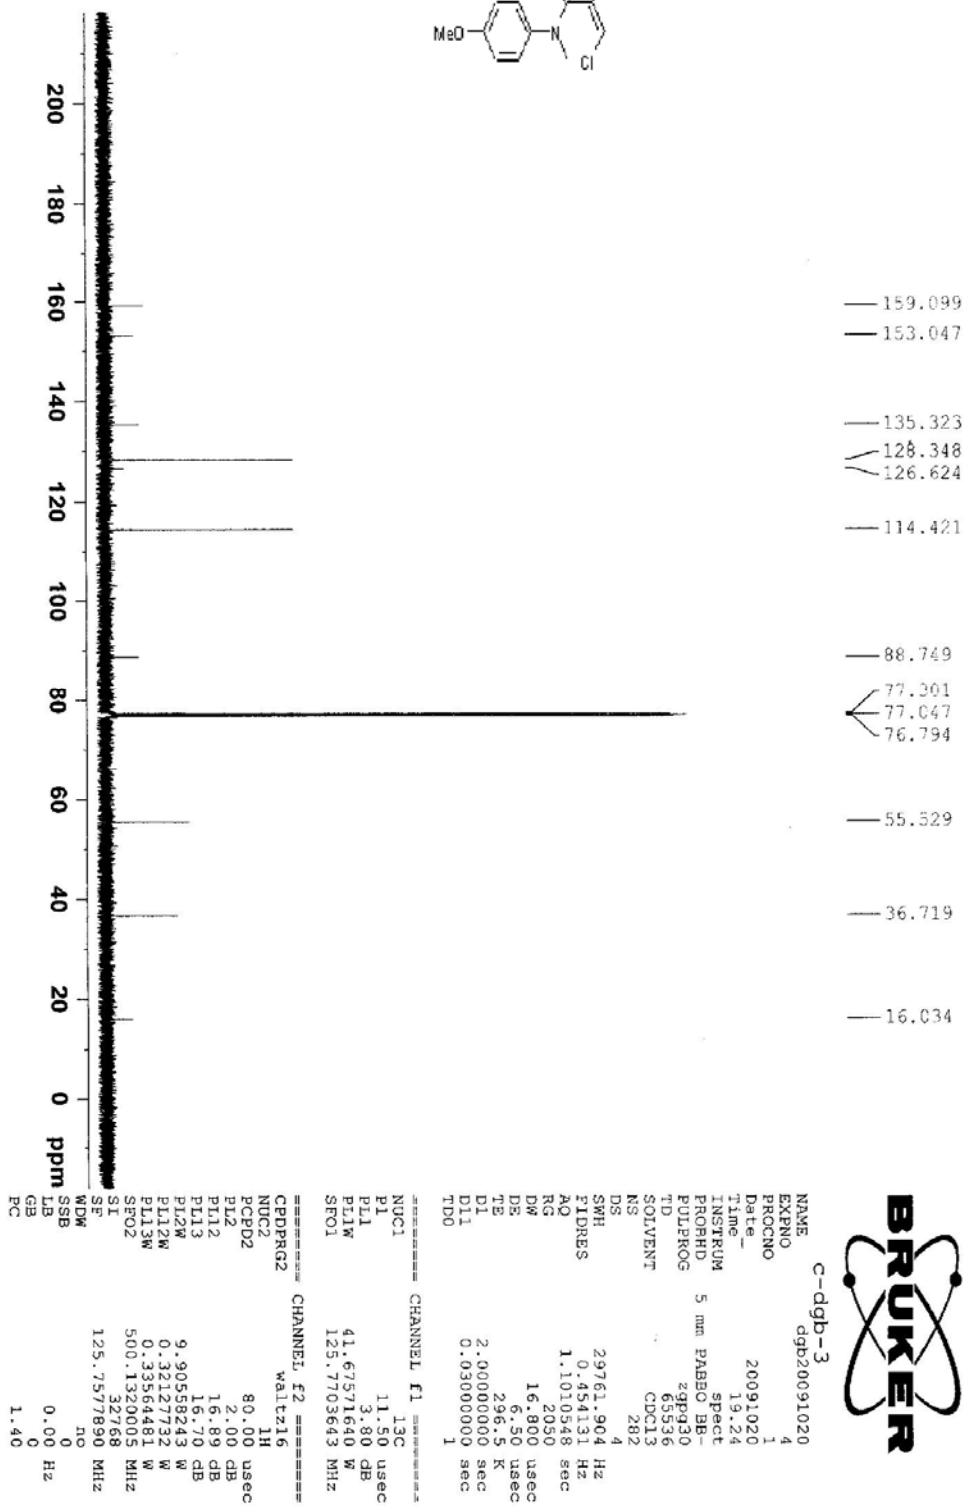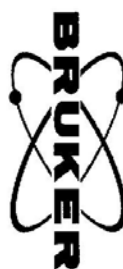

### 3-Chloro-2-iodo-N-methyl-N-o-tolylacrylamide (1d)

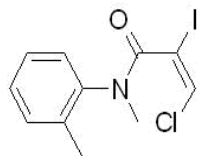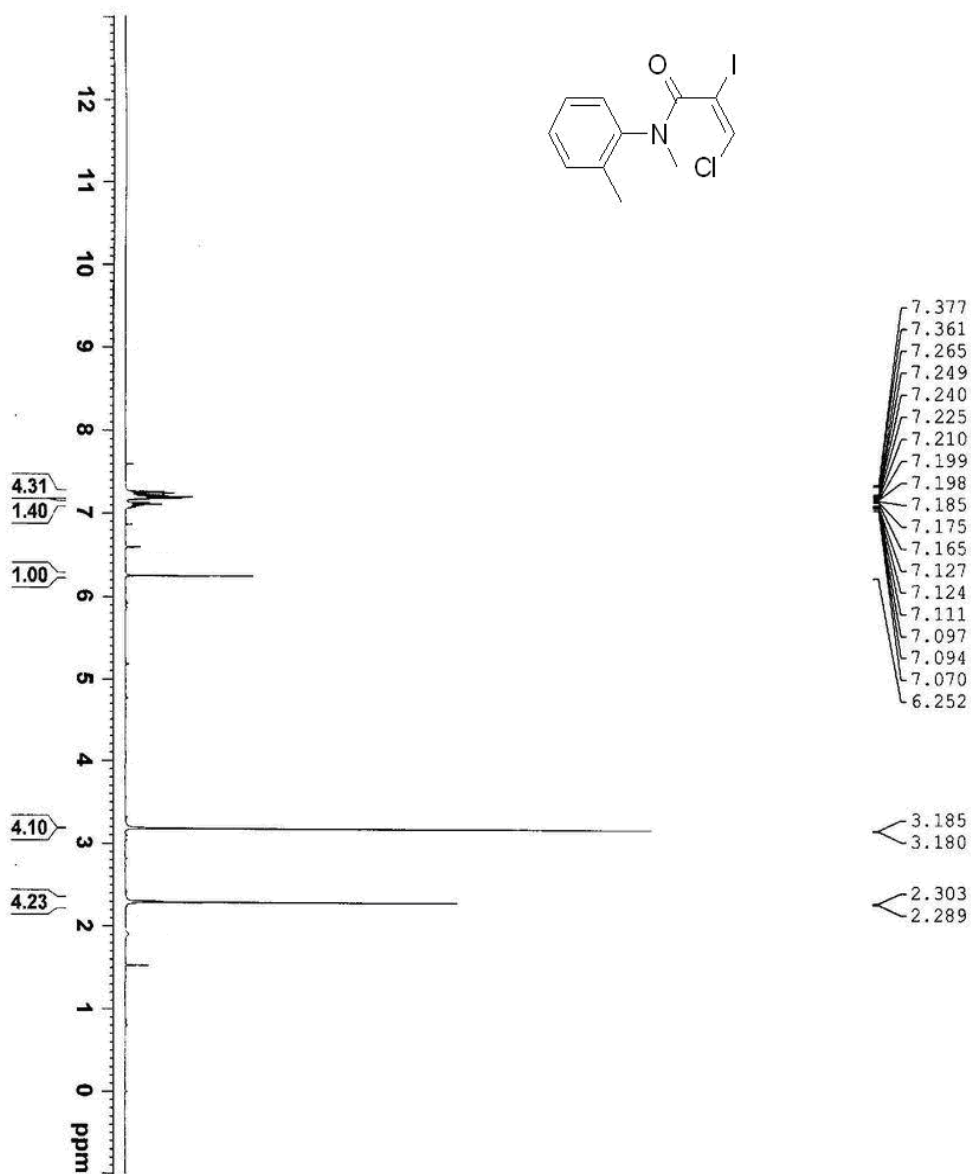

NAME h-dgb-2  
 EXPNO dgb20110508  
 PROCNO 1  
 Date\_ 20110508  
 Time\_ 11.28  
 INSTRUM spect  
 PROBHD z930  
 PULPROG zgpg30  
 TD 65536  
 SOLVENT CDCl3  
 NS 16  
 DS 2  
 SWH 10330.578 Hz  
 FIDRES 0.157632 Hz  
 AQ 3.1719923 sec  
 RG 57  
 DM 48.400 usec  
 DE 6.50 usec  
 TE 298.4 K  
 D1 1.00000000 sec  
 TDO 1

===== CHANNEL f1 =====  
 NUCL 1H  
 P1 14.60 usec  
 PL1 2.00 dB  
 PL1W 9.90558243 W  
 SFO1 500.1330885 MHz  
 SI 32768  
 SF 500.1300428 MHz  
 WDM EM  
 SSB 0  
 LB 0.30 Hz  
 GB 0  
 PC 1.00

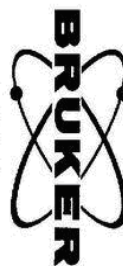



### 3-Chloro-2-iodo-N-methyl-N-o-tolylacrylamide (1d)

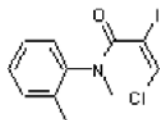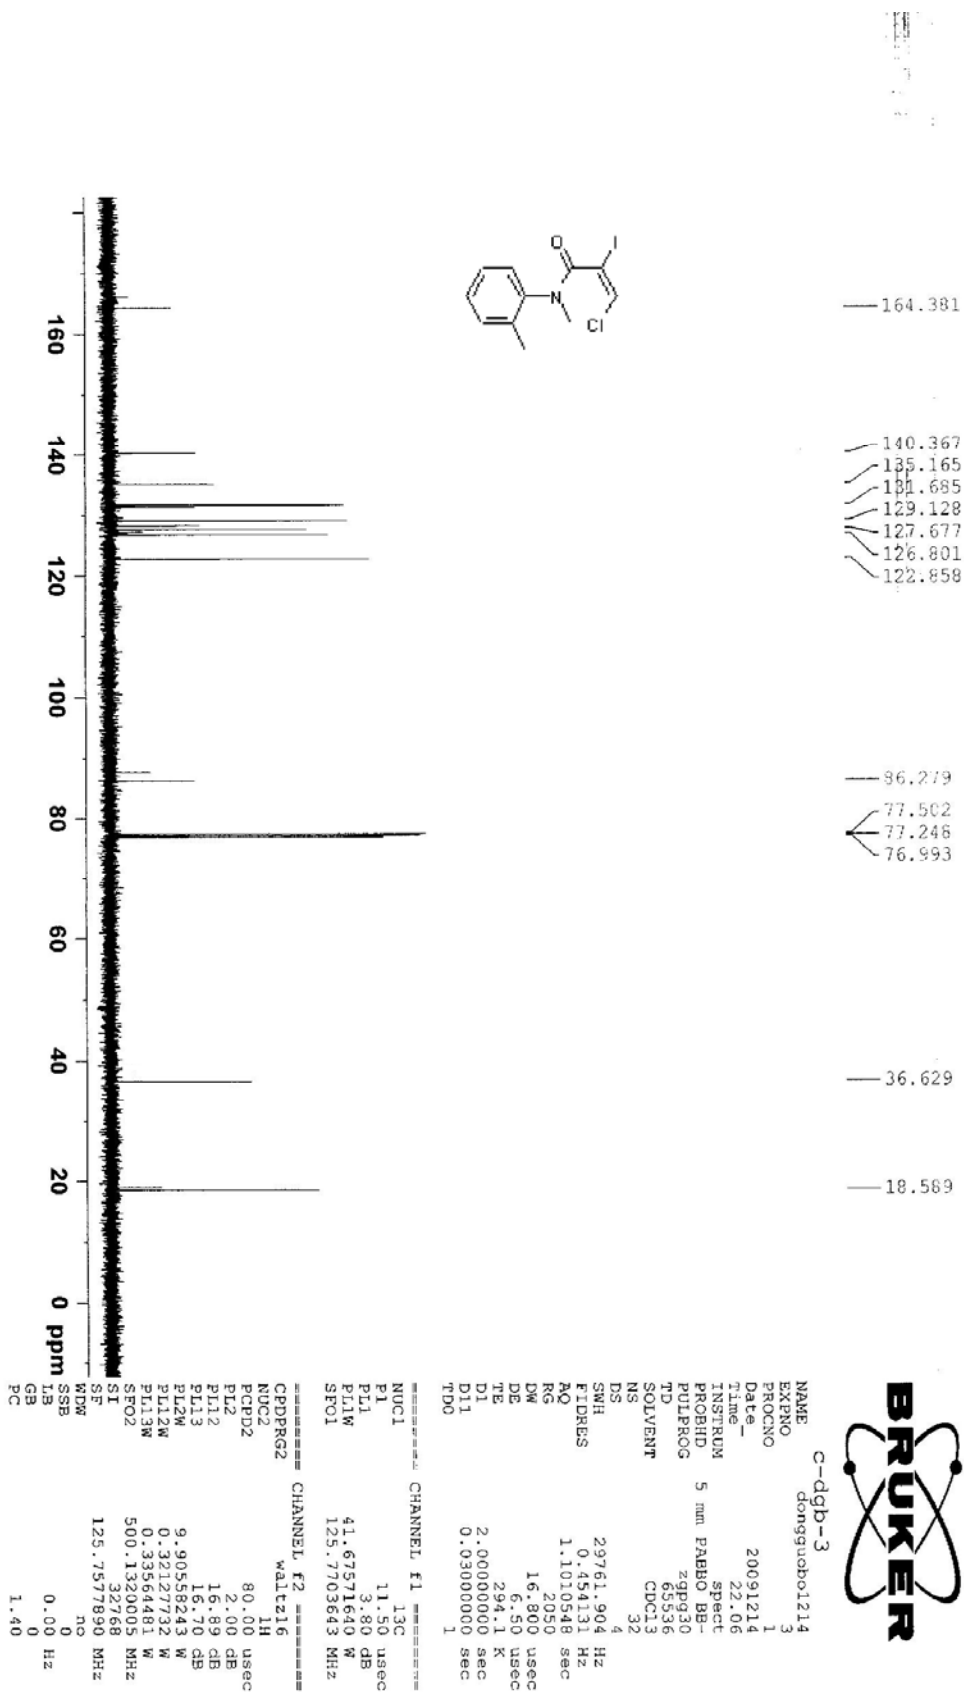

3-Chloro-N-(4-chlorophenyl)-2-iodo-N-methylacrylamide (1e)

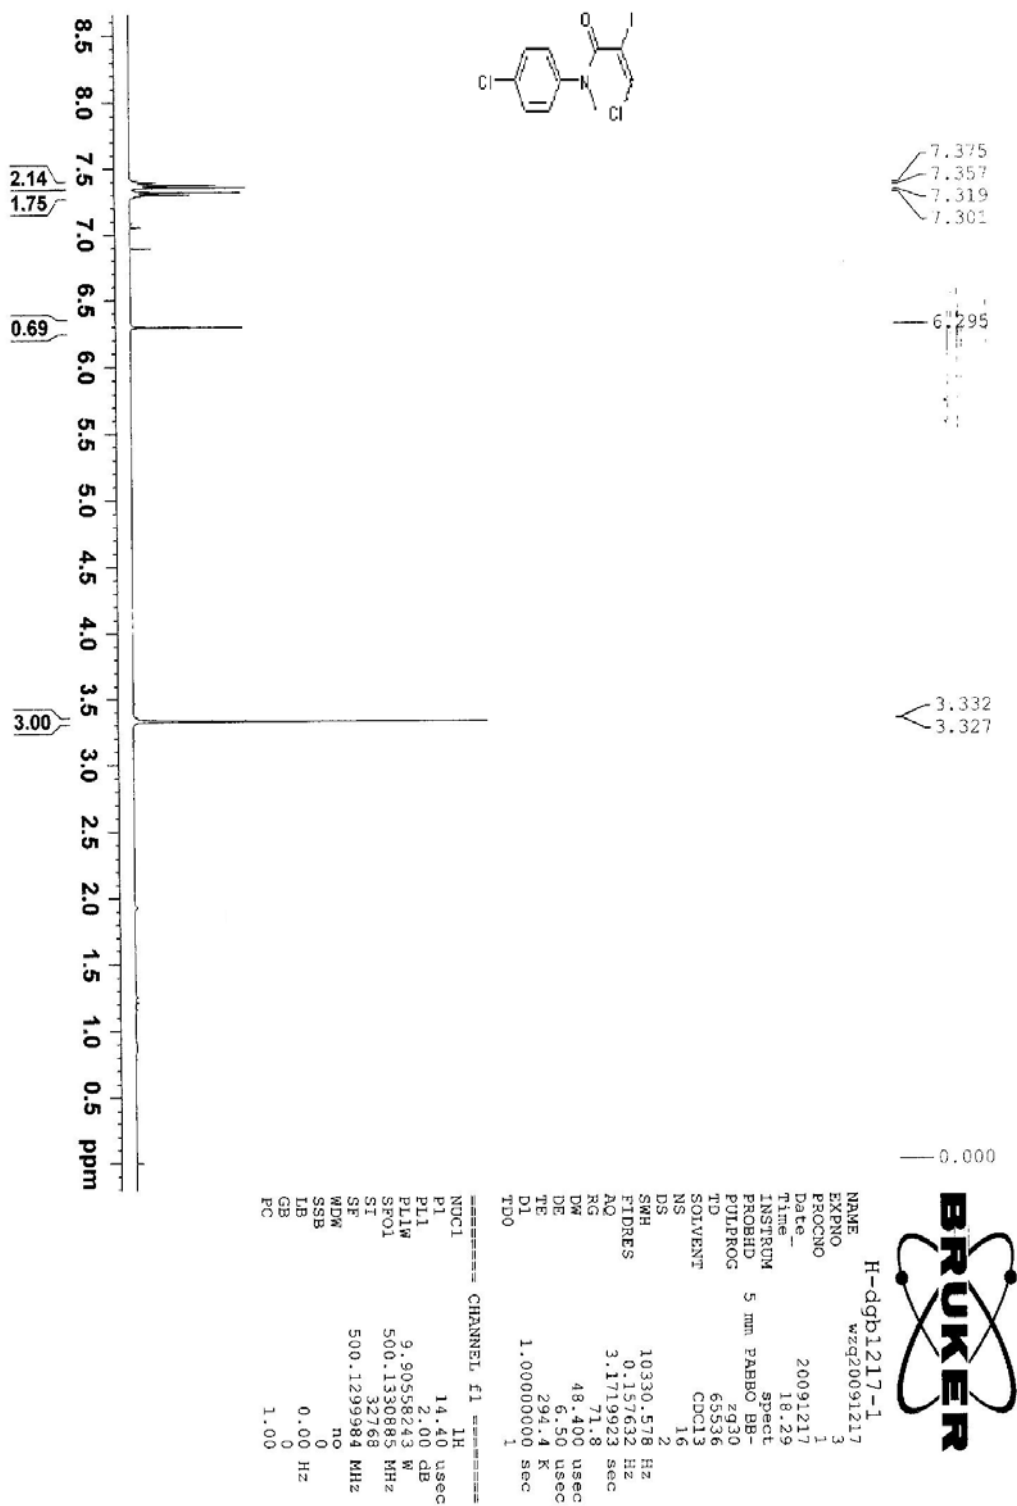

3-Chloro-N-(4-chlorophenyl)-2-iodo-N-methylacrylamide (1e)

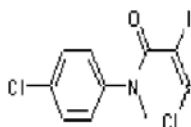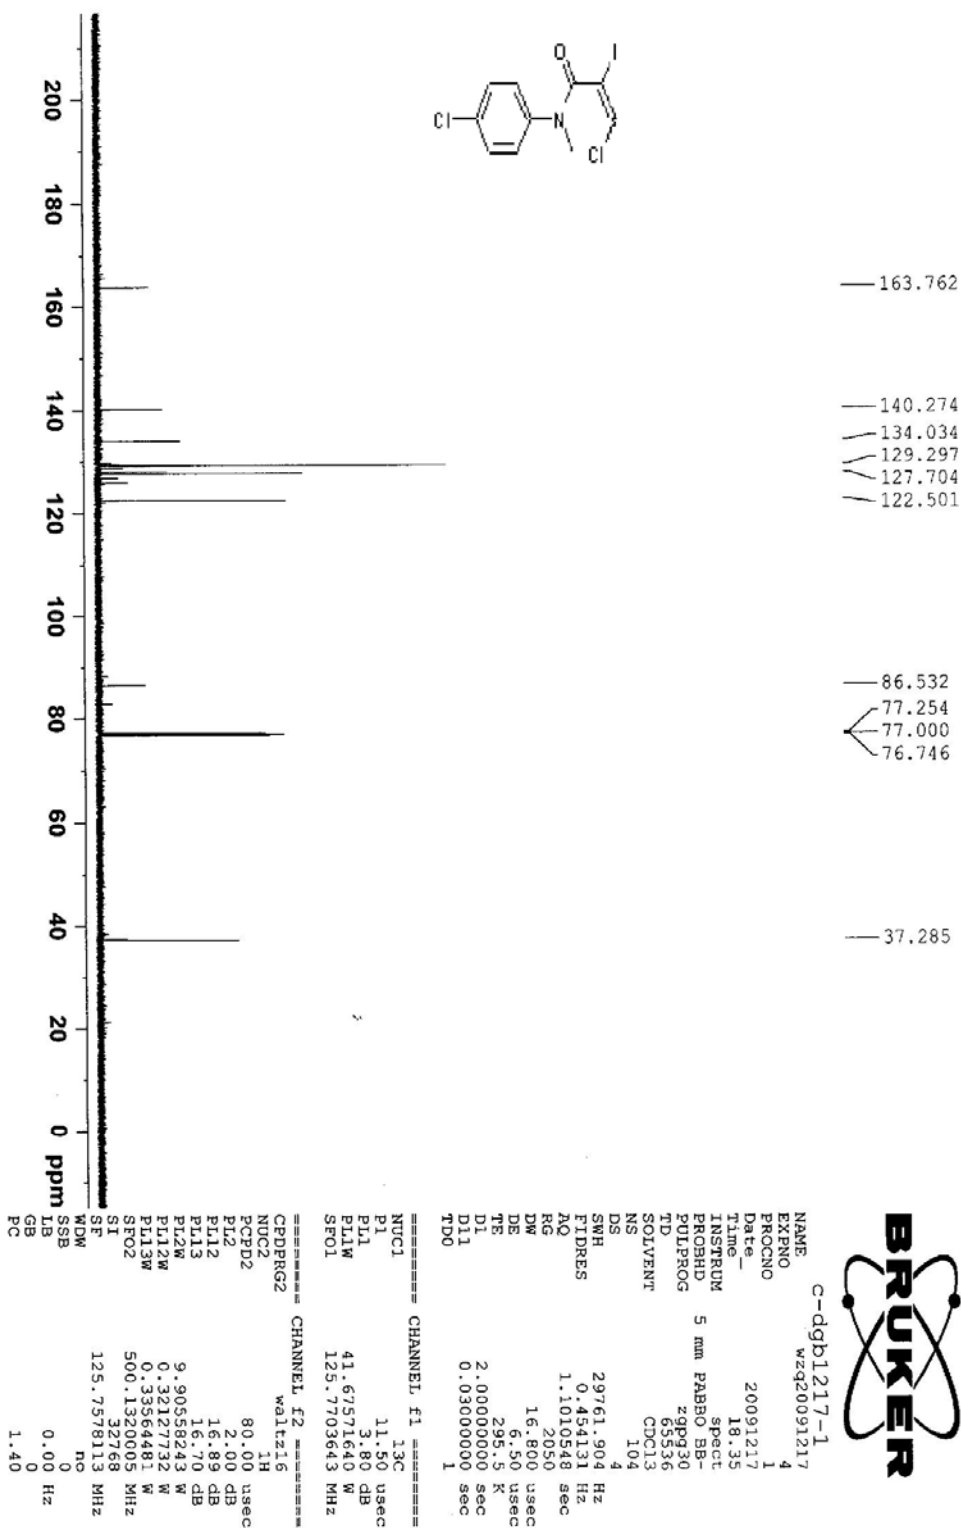

3-Chloro-2-iodo-N-methyl-N-(4-(trifluoromethyl)phenyl)acrylamide (1f)

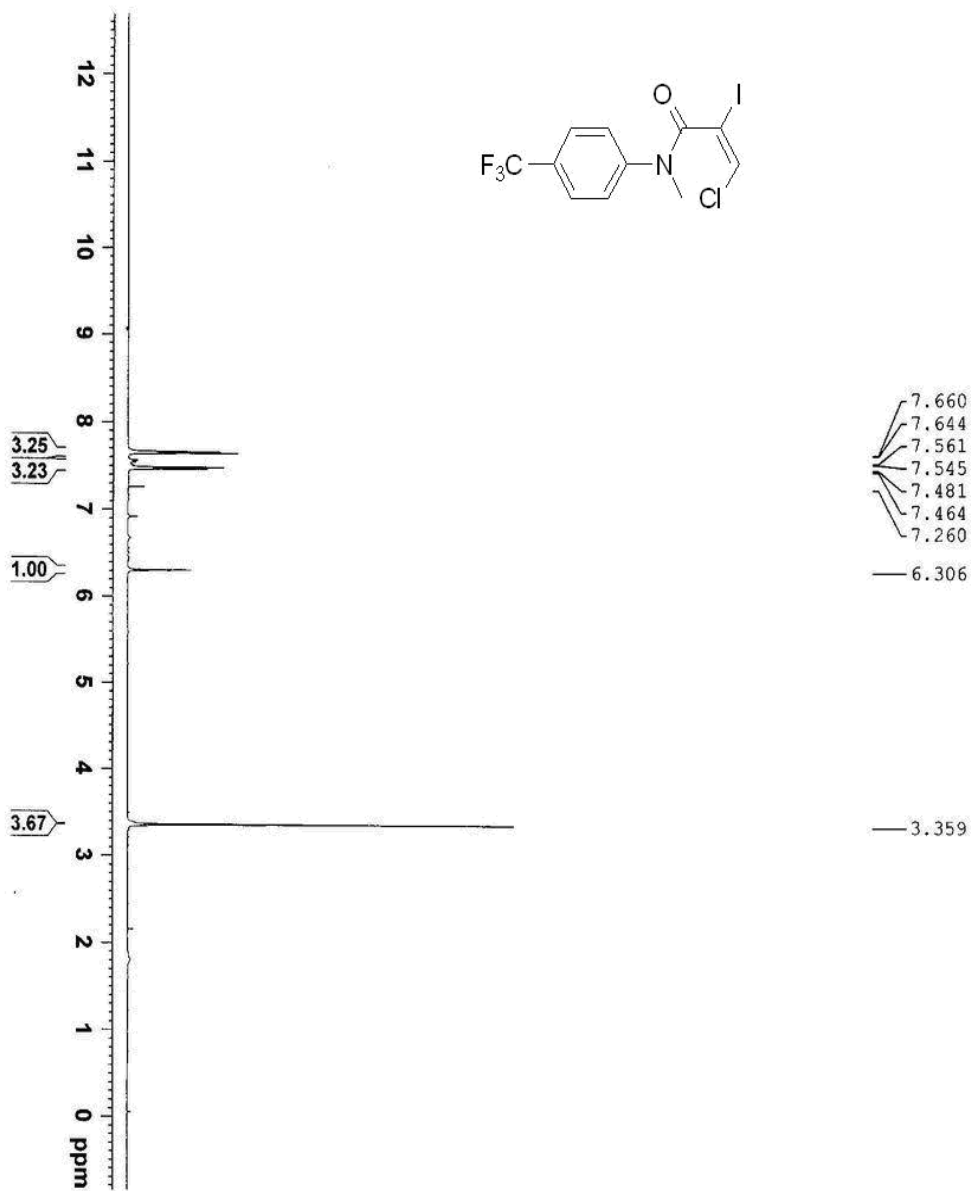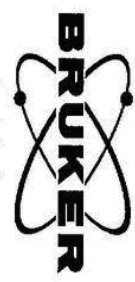

```

NAME h-dgb-3
EXPNO dgb20110508
PROCNO 3
Date_ 20110508
Time_ 11.33
INSTRUM spect
PROBHD 5 mm PABBO BB-
PULPROG zg30
TD 65536
SOLVENT CDCl3
NS 16
DS 2
SWH 10330.578 Hz
FIDRES 0.157632 Hz
AQ 3.1719923 sec
RG 128
DE 48.400 usec
TE 298.4 K
D1 1.00000000 Sec
TDO 1

===== CHANNEL f1 =====
NUC1 1H
P1 14.60 usec
PL1 2.00 dB
PL1W 9.90558243 W
SFO1 500.1330885 MHz
SI 32768
SF 500.1300132 MHz
WDW EM
SSB 0
LB 0
GB 0
PC 1.00
    
```



(Z)-N-((1-Methyl-2-oxoindolin-3-ylidene)methyl)benzamide (3)

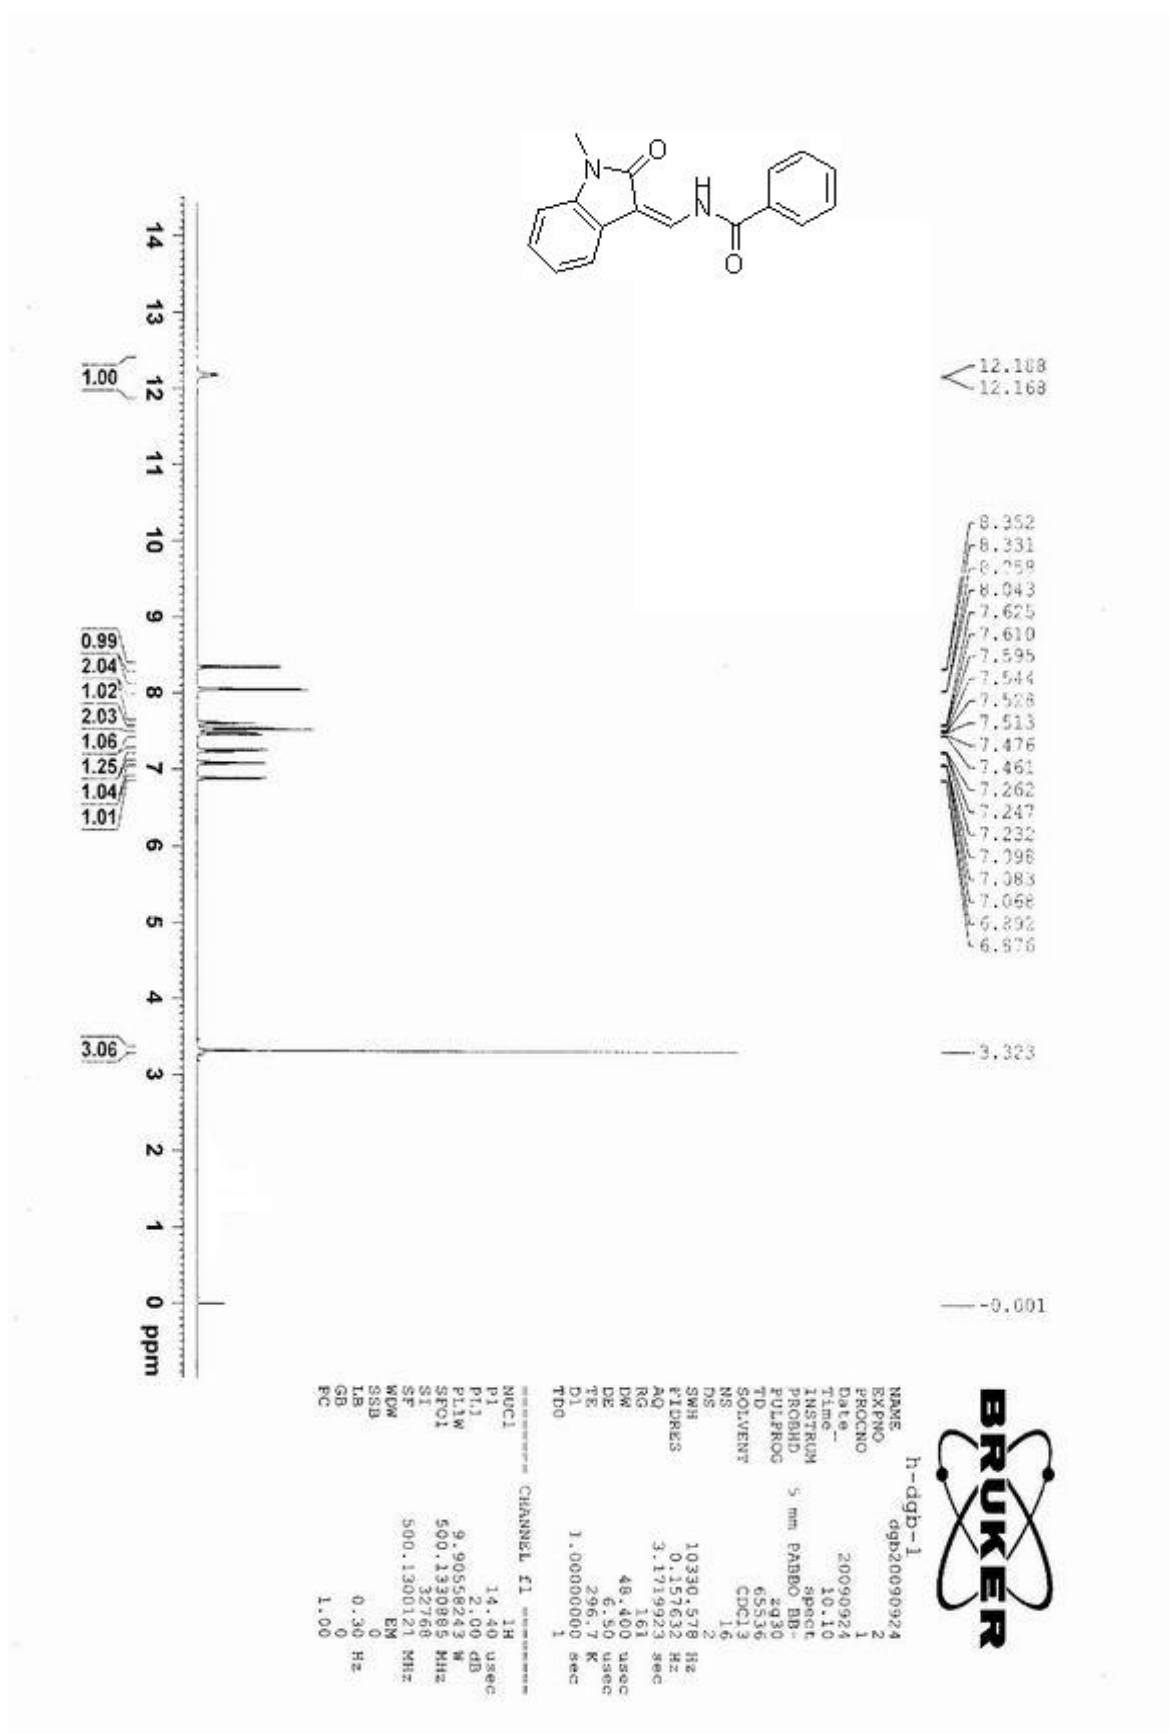

(Z)-N-((1-Methyl-2-oxindolin-3-ylidene)methyl)benzamide (3)

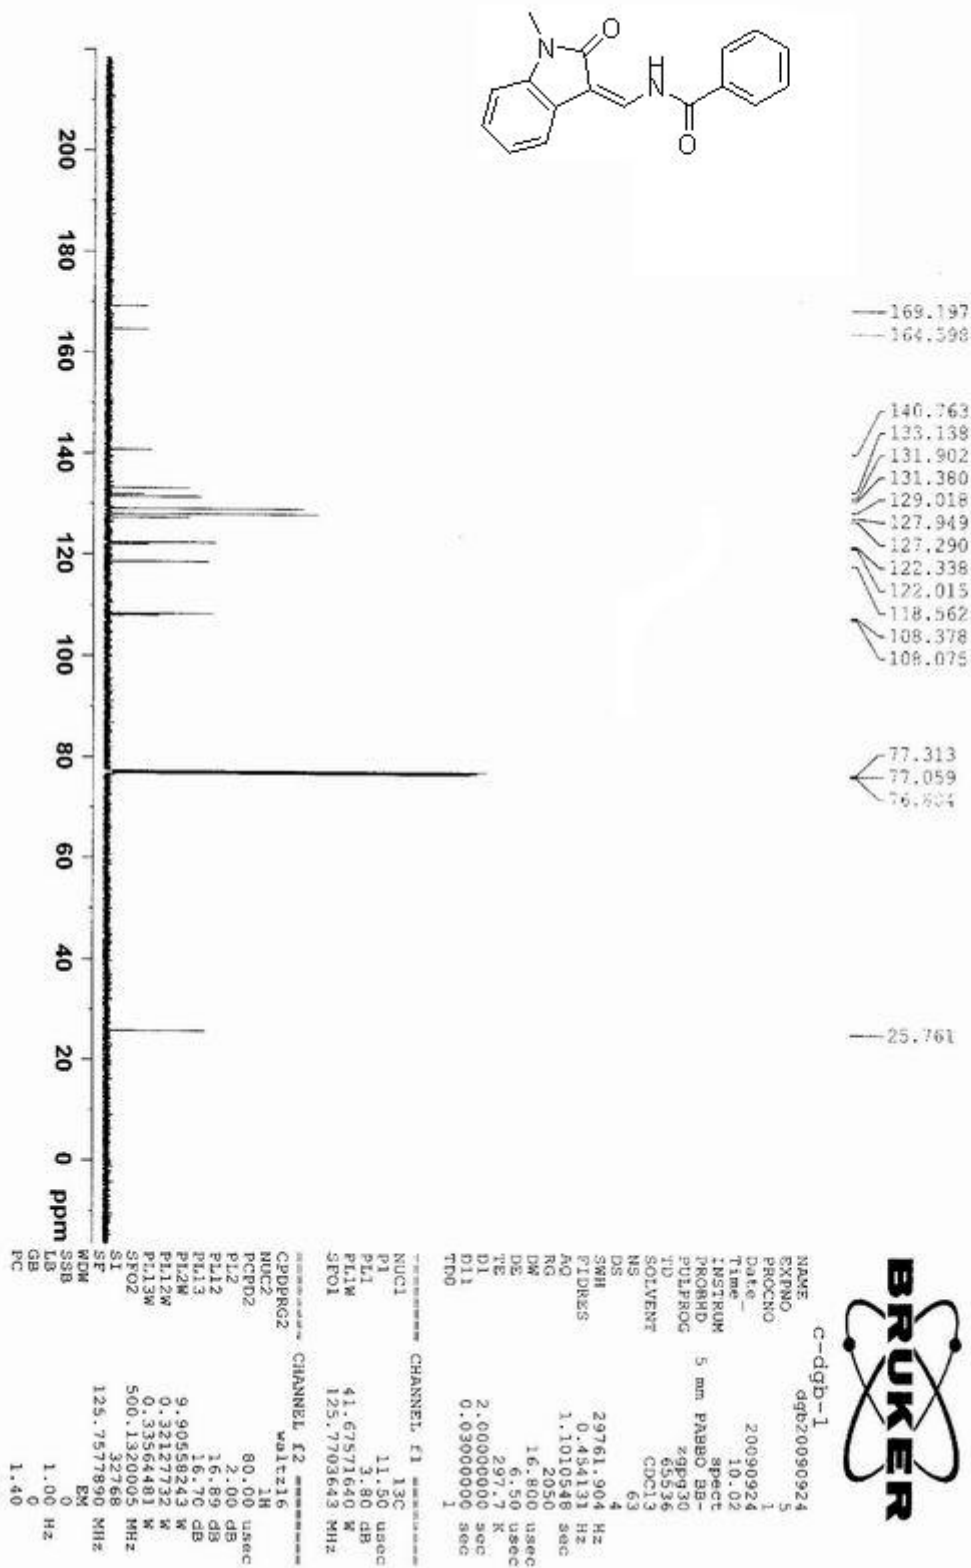

(Z)-N-((1-Benzyl-2-oxindolin-3-ylidene)methyl)benzamide (4)

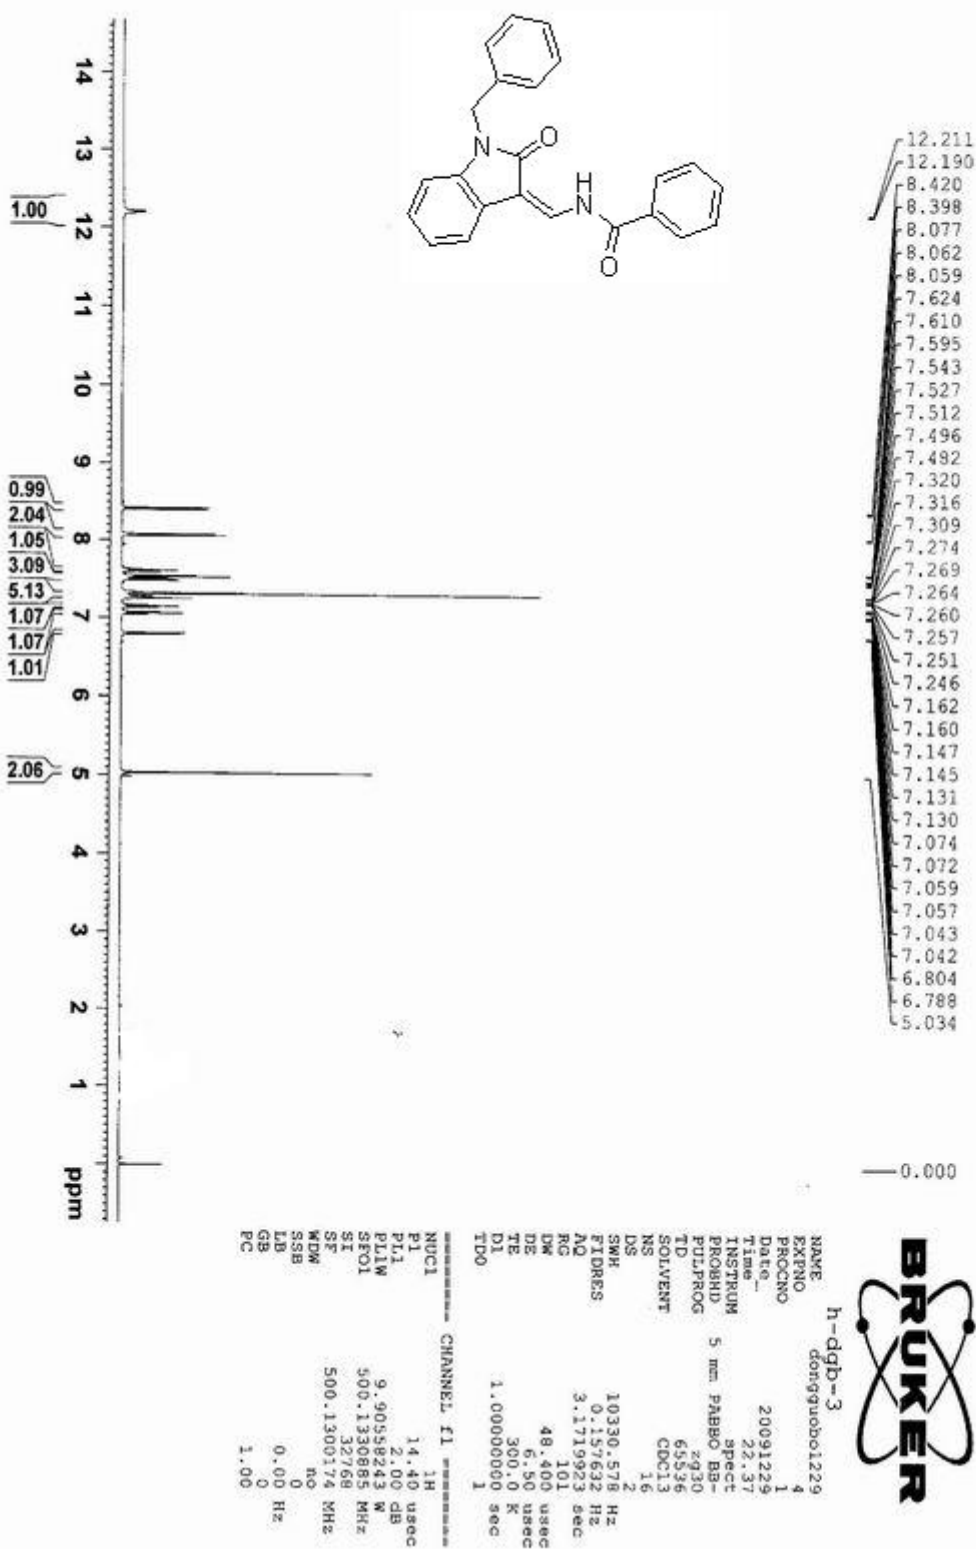



(Z)-N-((1-Benzyl-2-oxindolin-3-ylidene)methyl)benzamide (4)

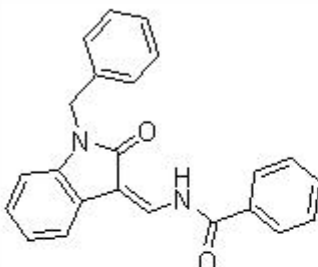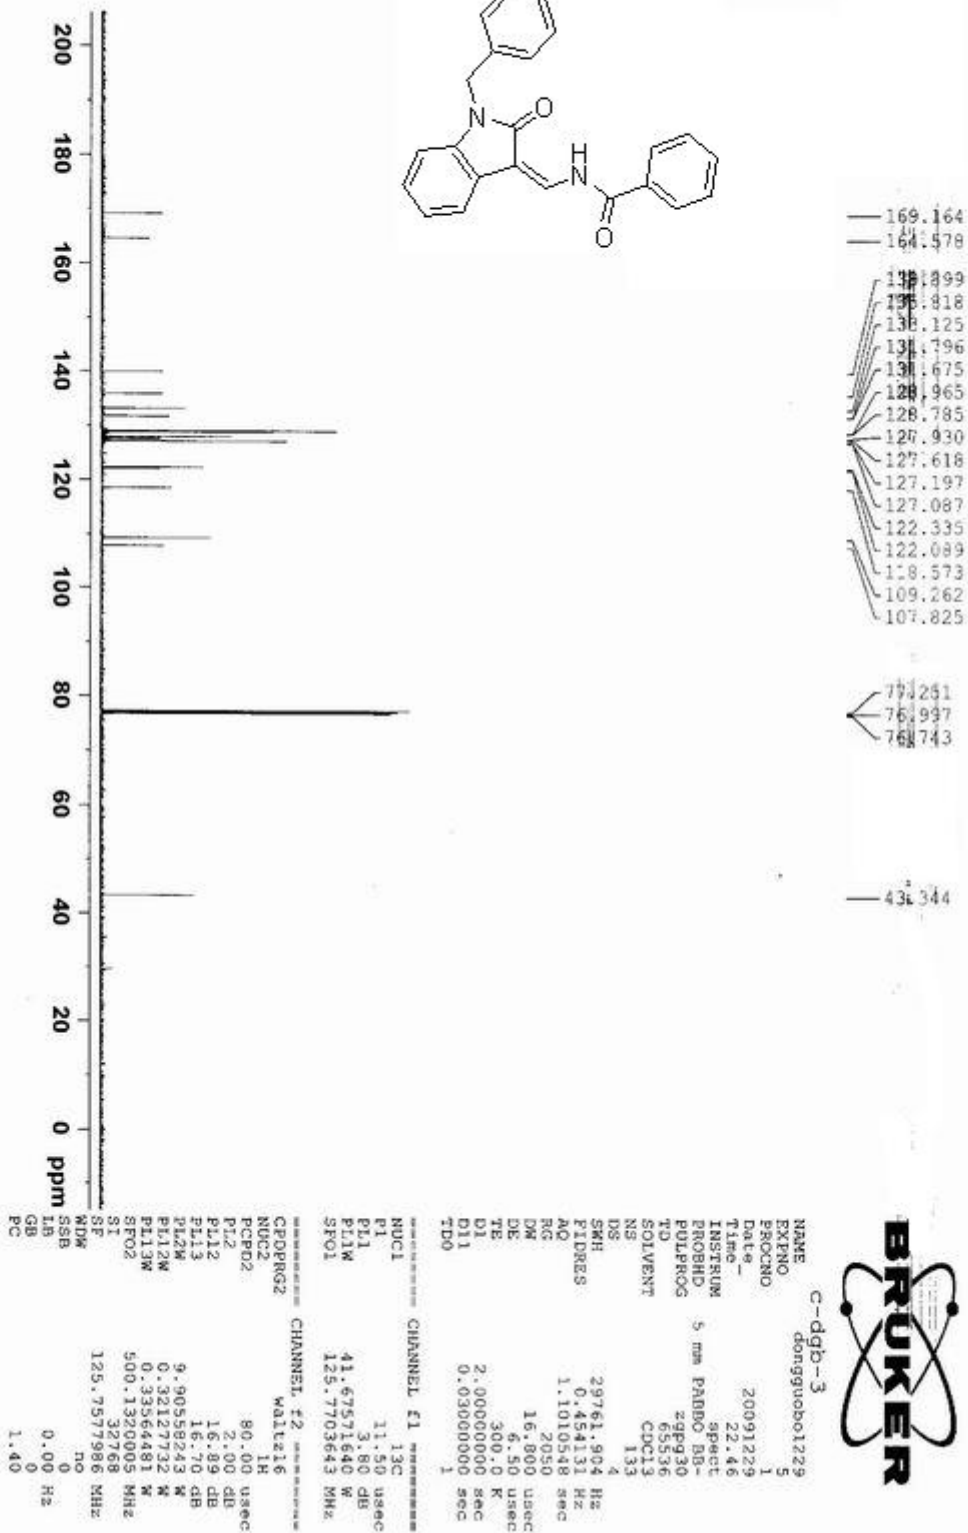

(Z)-N-((5-Methoxy-1-methyl-2-oxindolin-3-ylidene)methyl)benzamide (5)

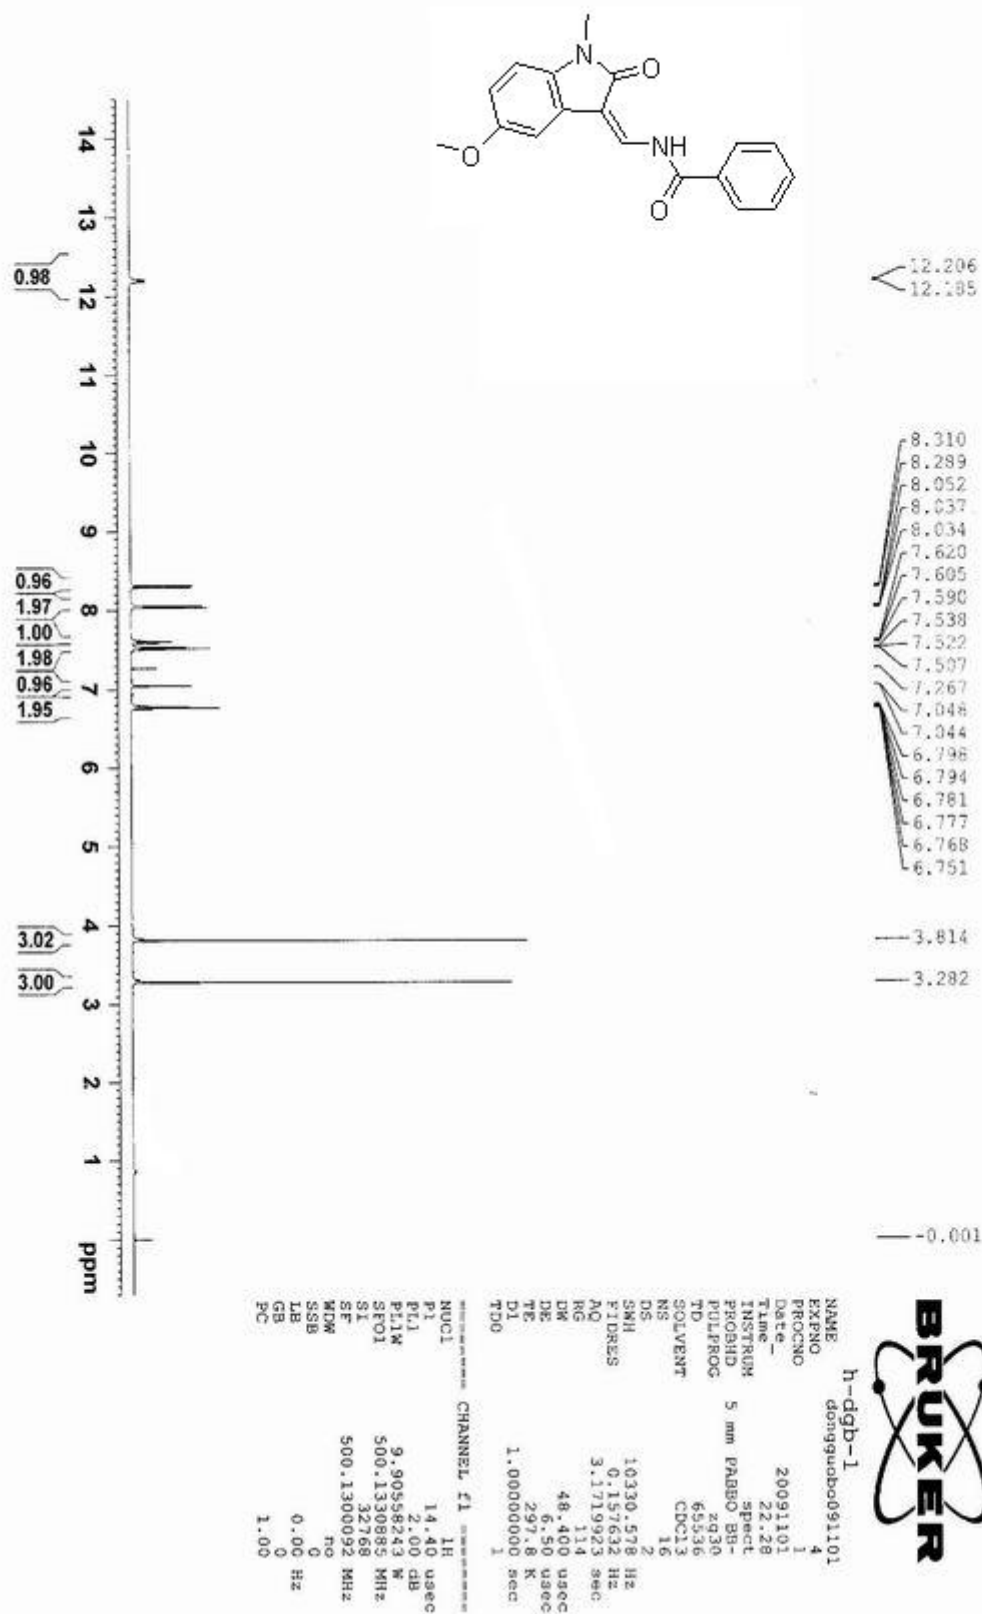

(Z)-N-((5-Methoxy-1-methyl-2-oxindolin-3-ylidene)methyl)benzamide (5)

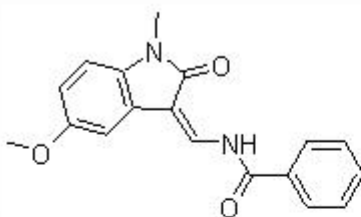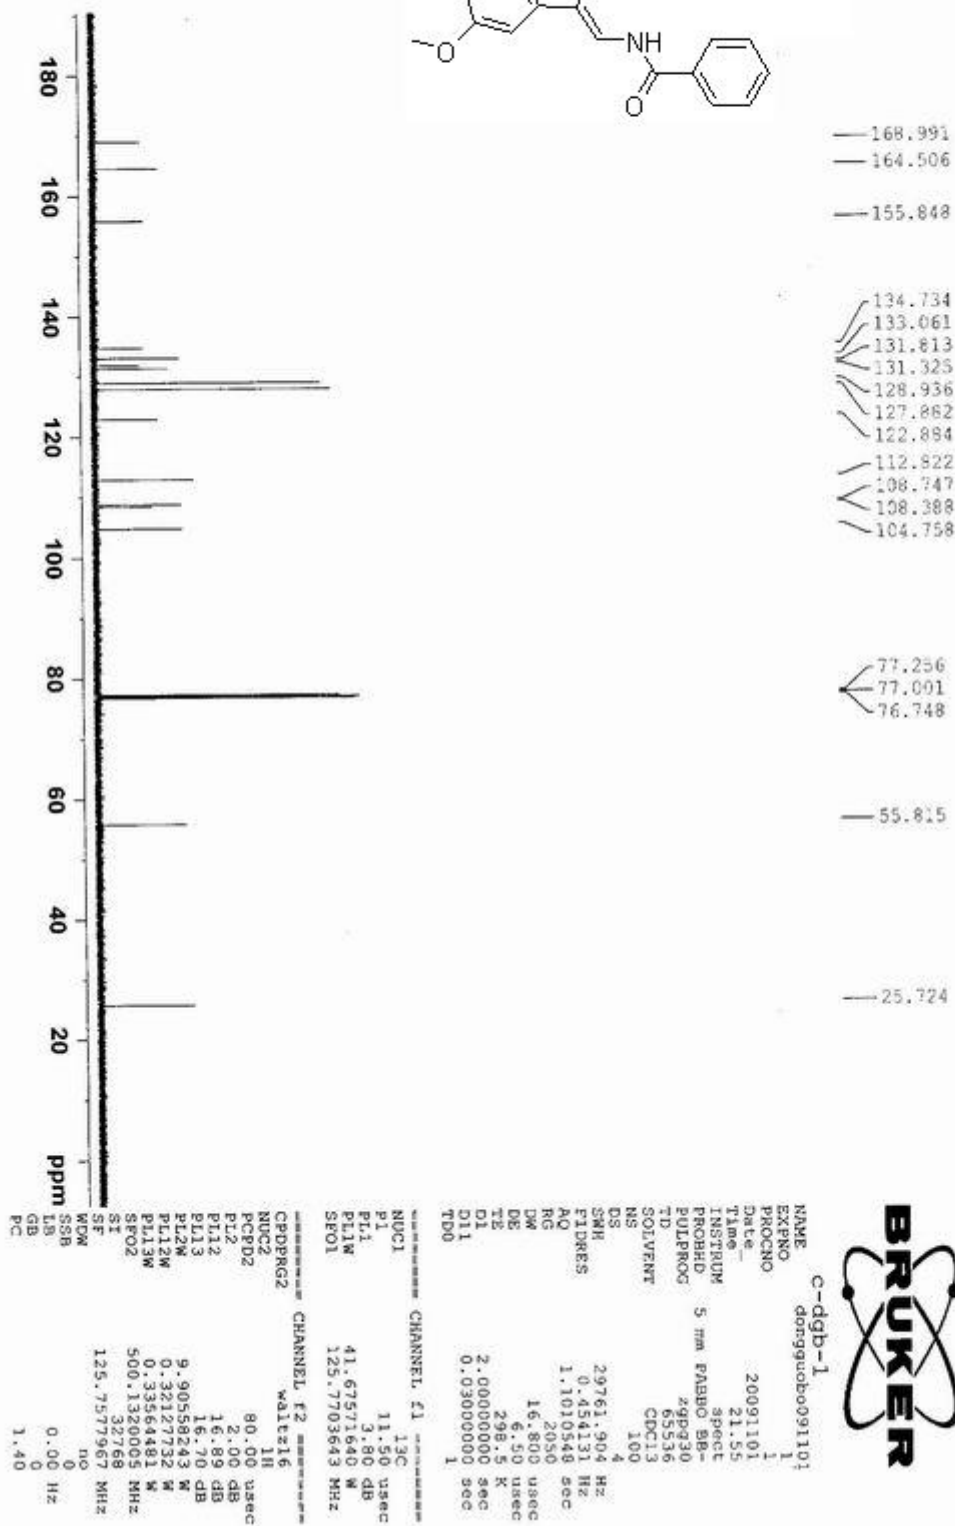

(Z)-N-((1,7-Dimethyl-2-oxoindolin-3-ylidene)methyl)benzamide (6)

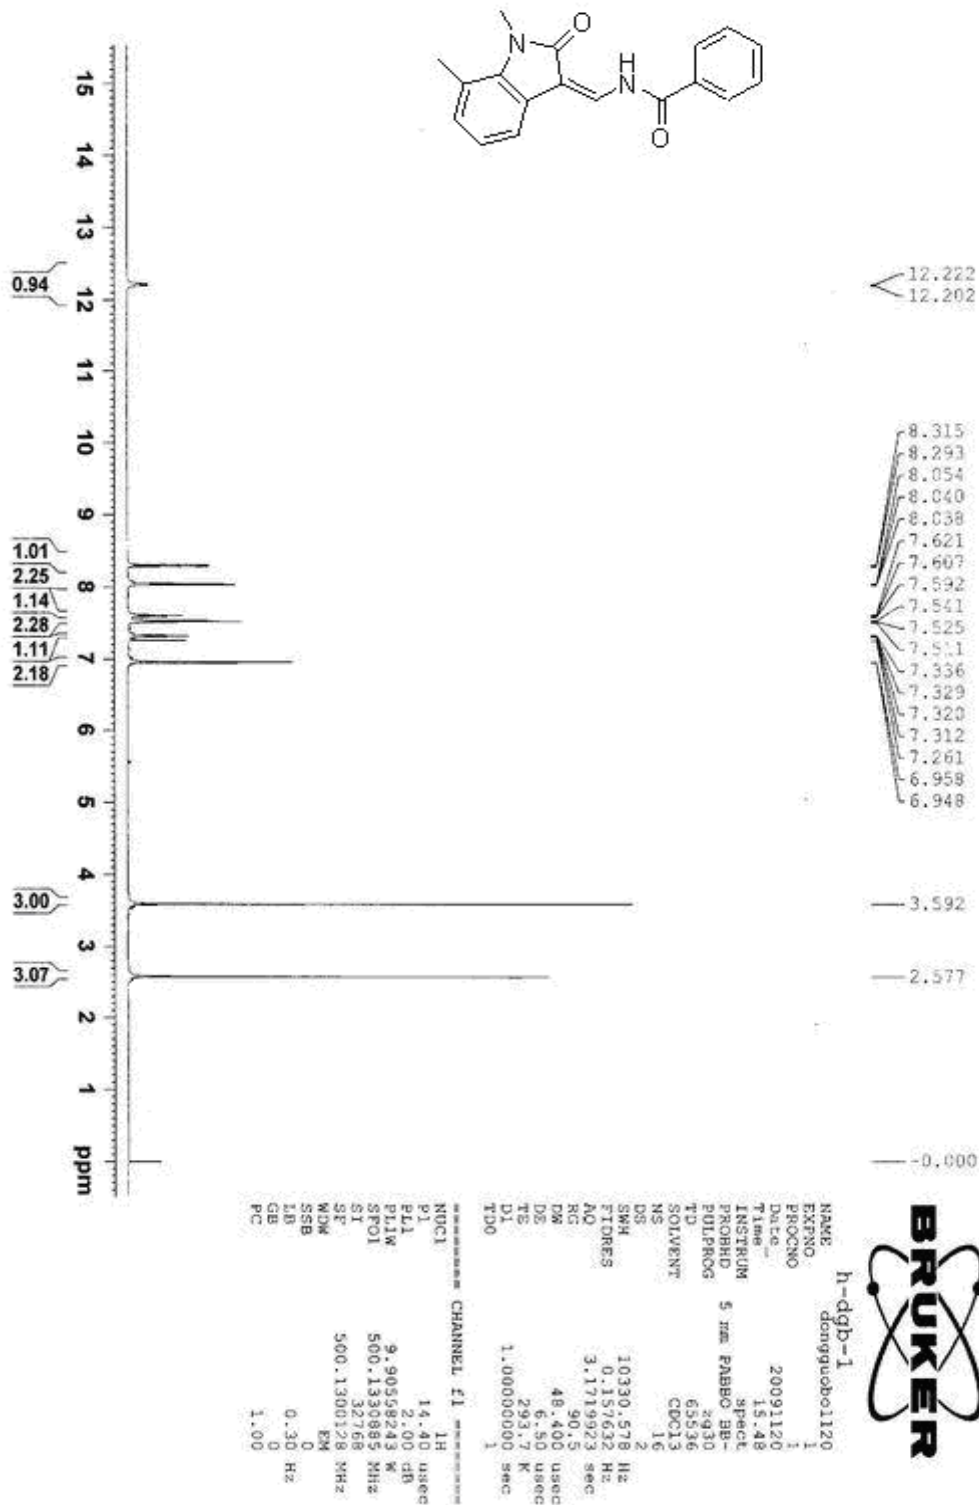

(Z)-N-((1,7-Dimethyl-2-oxindolin-3-ylidene)methyl)benzamide (6)

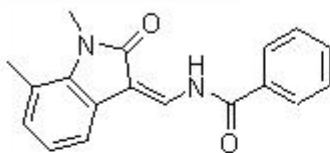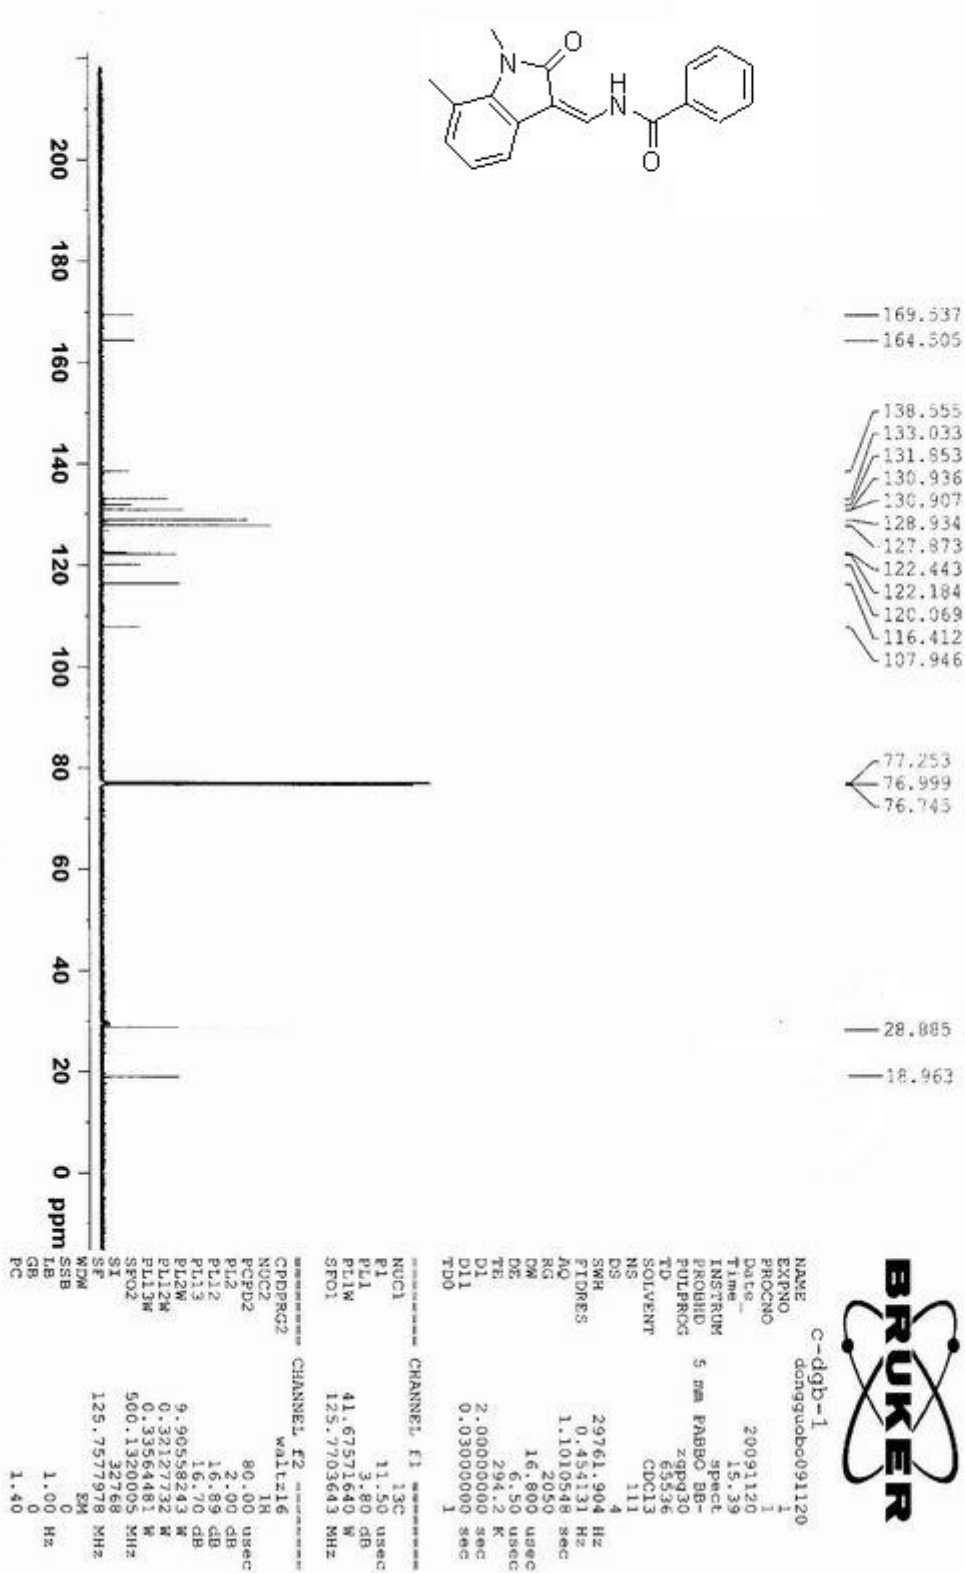

(Z)-N-((5-Chloro-1-methyl-2-oxoindolin-3-ylidene)methyl)benzamide (7)

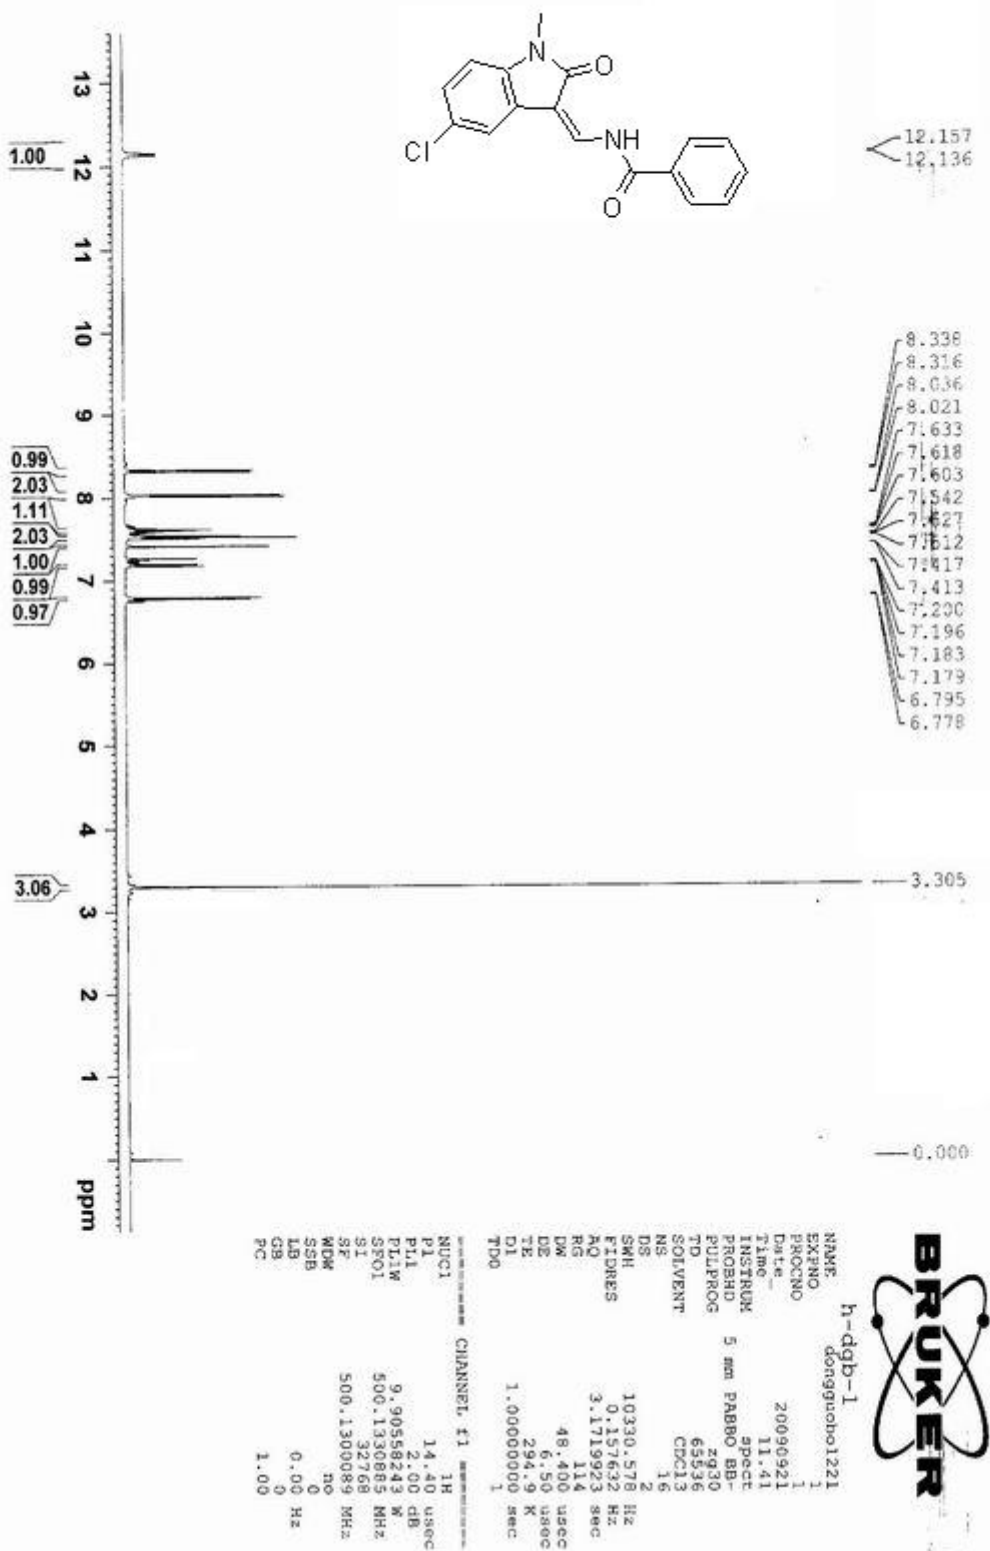

(Z)-N-((5-Chloro-1-methyl-2-oxindolin-3-ylidene)methyl)benzamide (7)

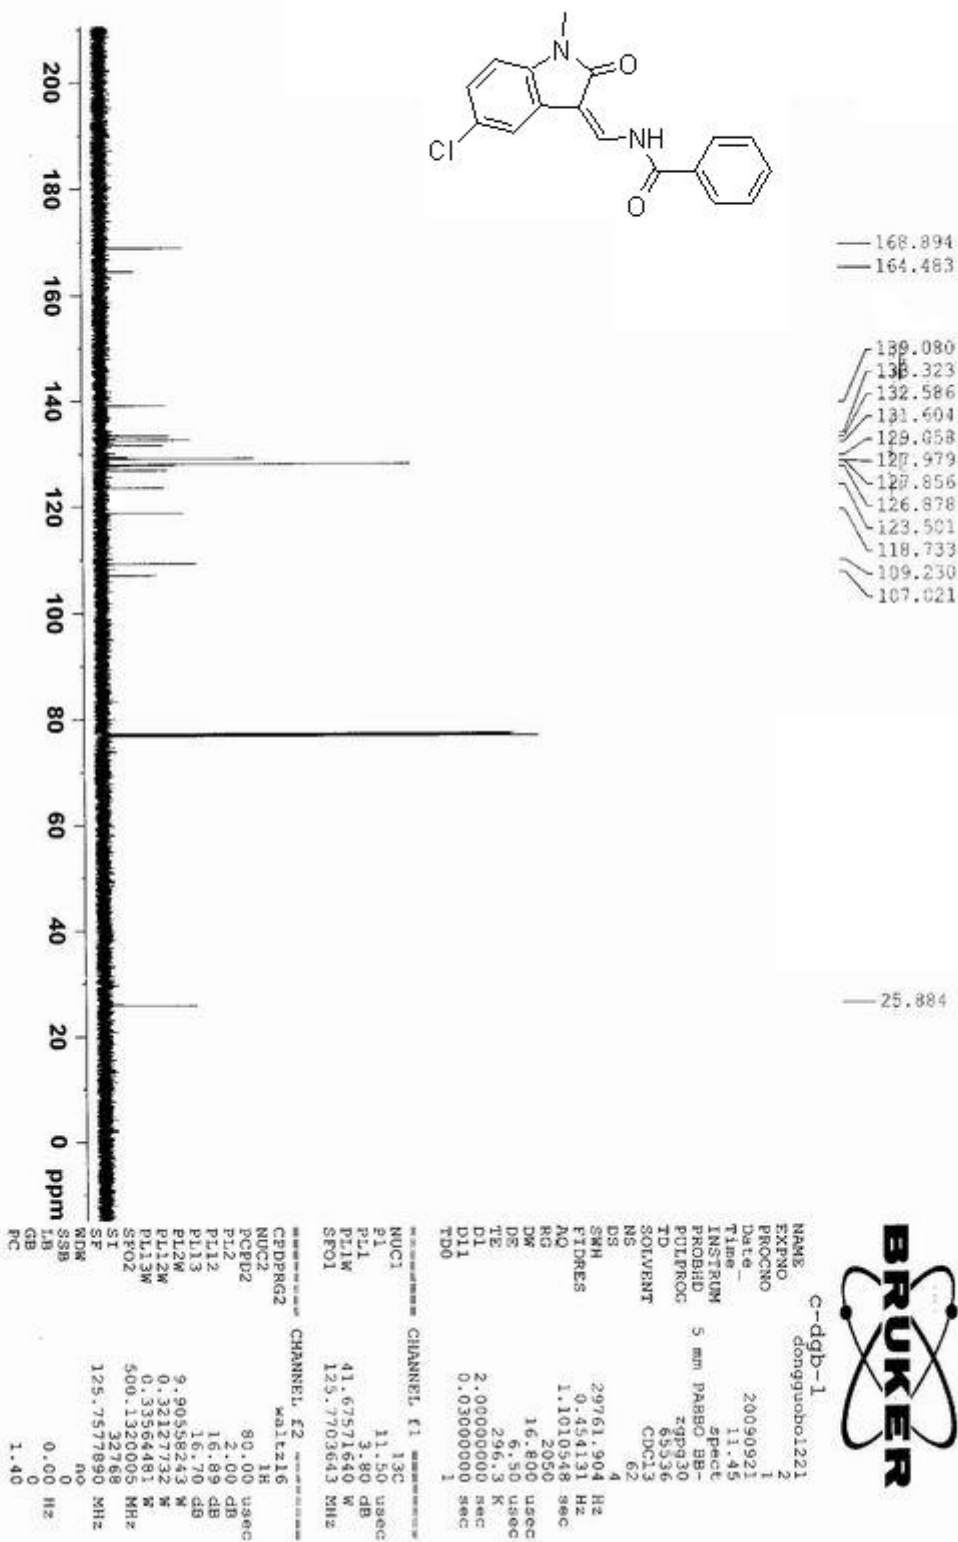

(Z)-N-((1-Methyl-2-oxo-5-(trifluoromethyl)indolin-3-ylidene)methyl)benzamide (8)

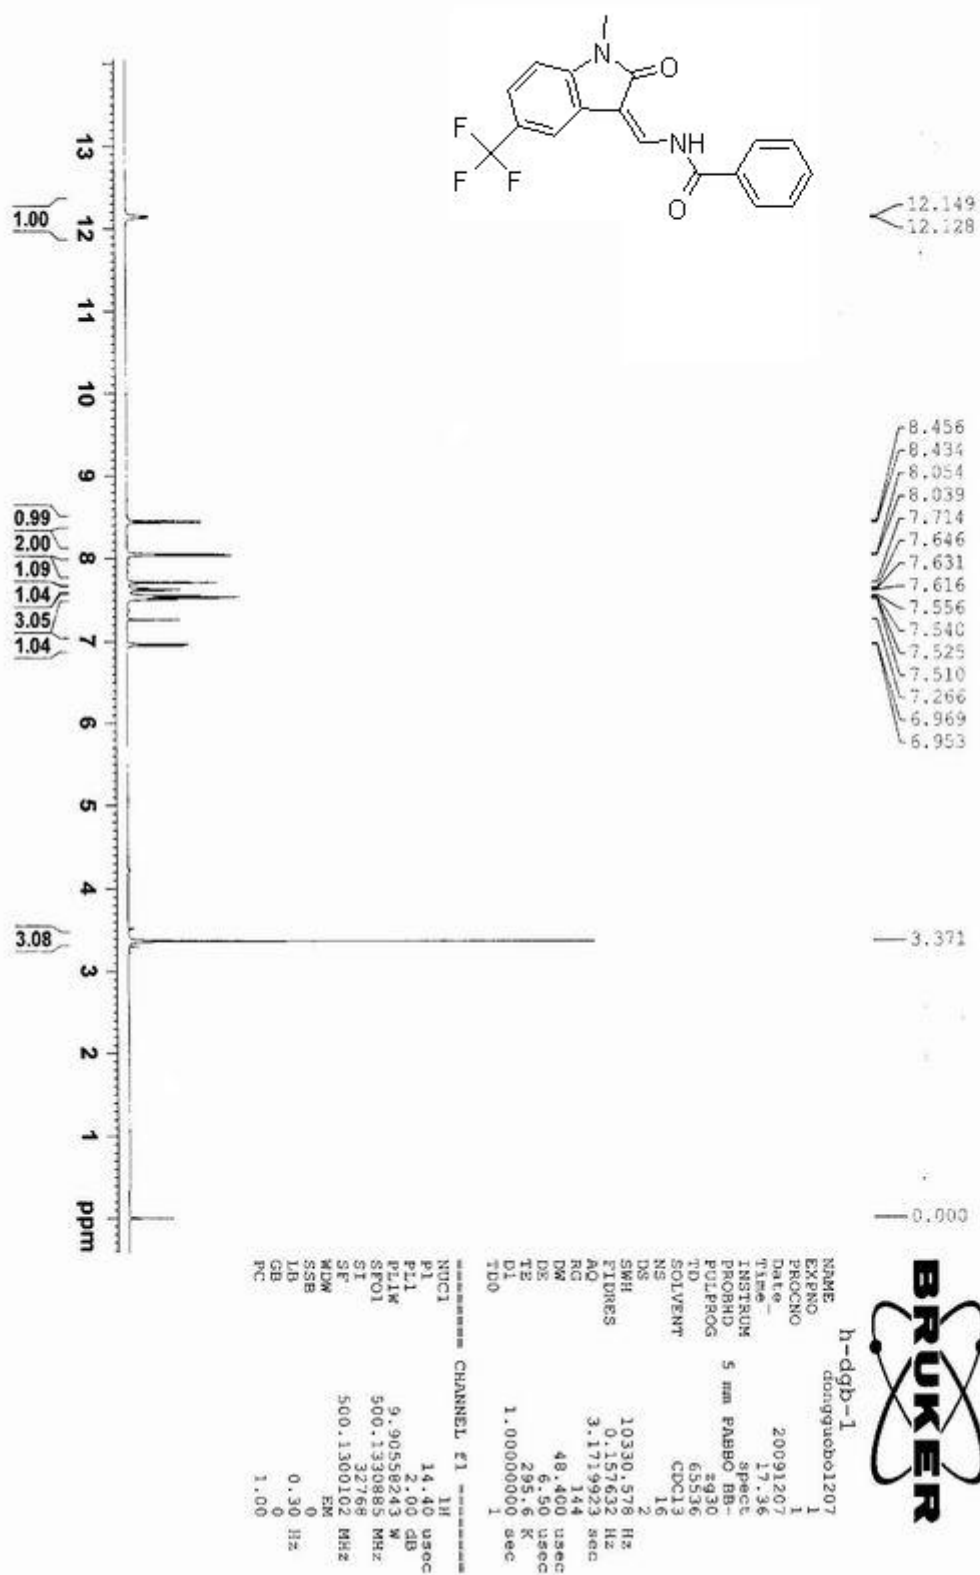



(Z)-N-((1-Methyl-2-oxo-5-(trifluoromethyl)indolin-3-ylidene)methyl)benzamide (8)

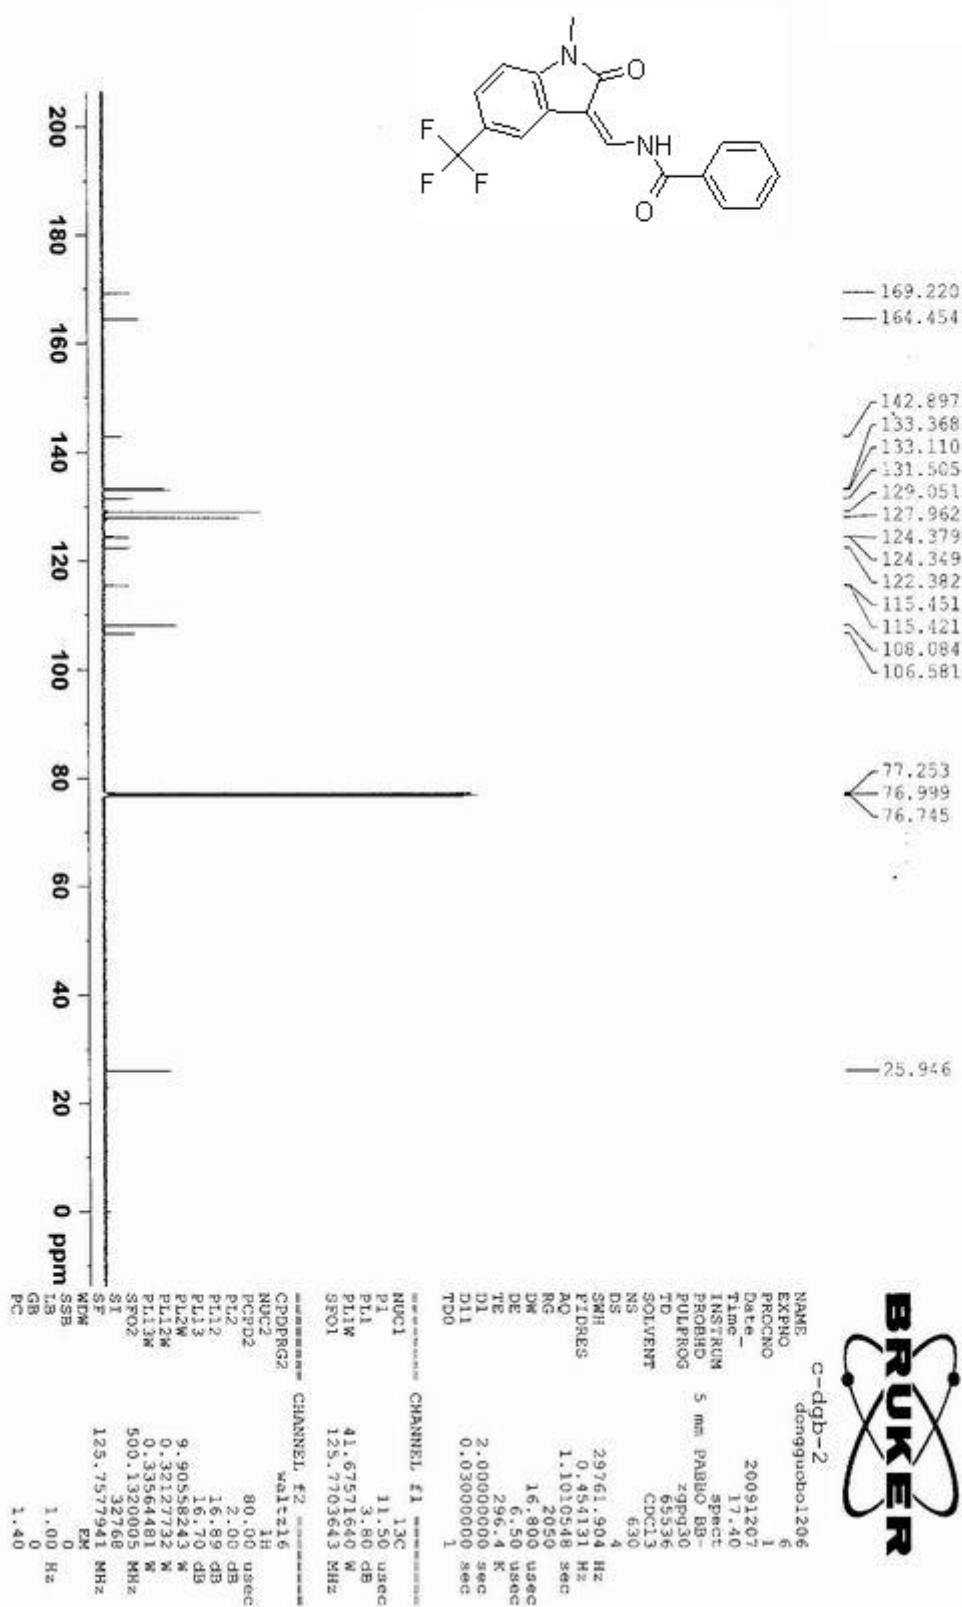

(Z)-4-Methyl-N-((1-methyl-2-oxoindolin-3-ylidene)methyl)benzamide (9)

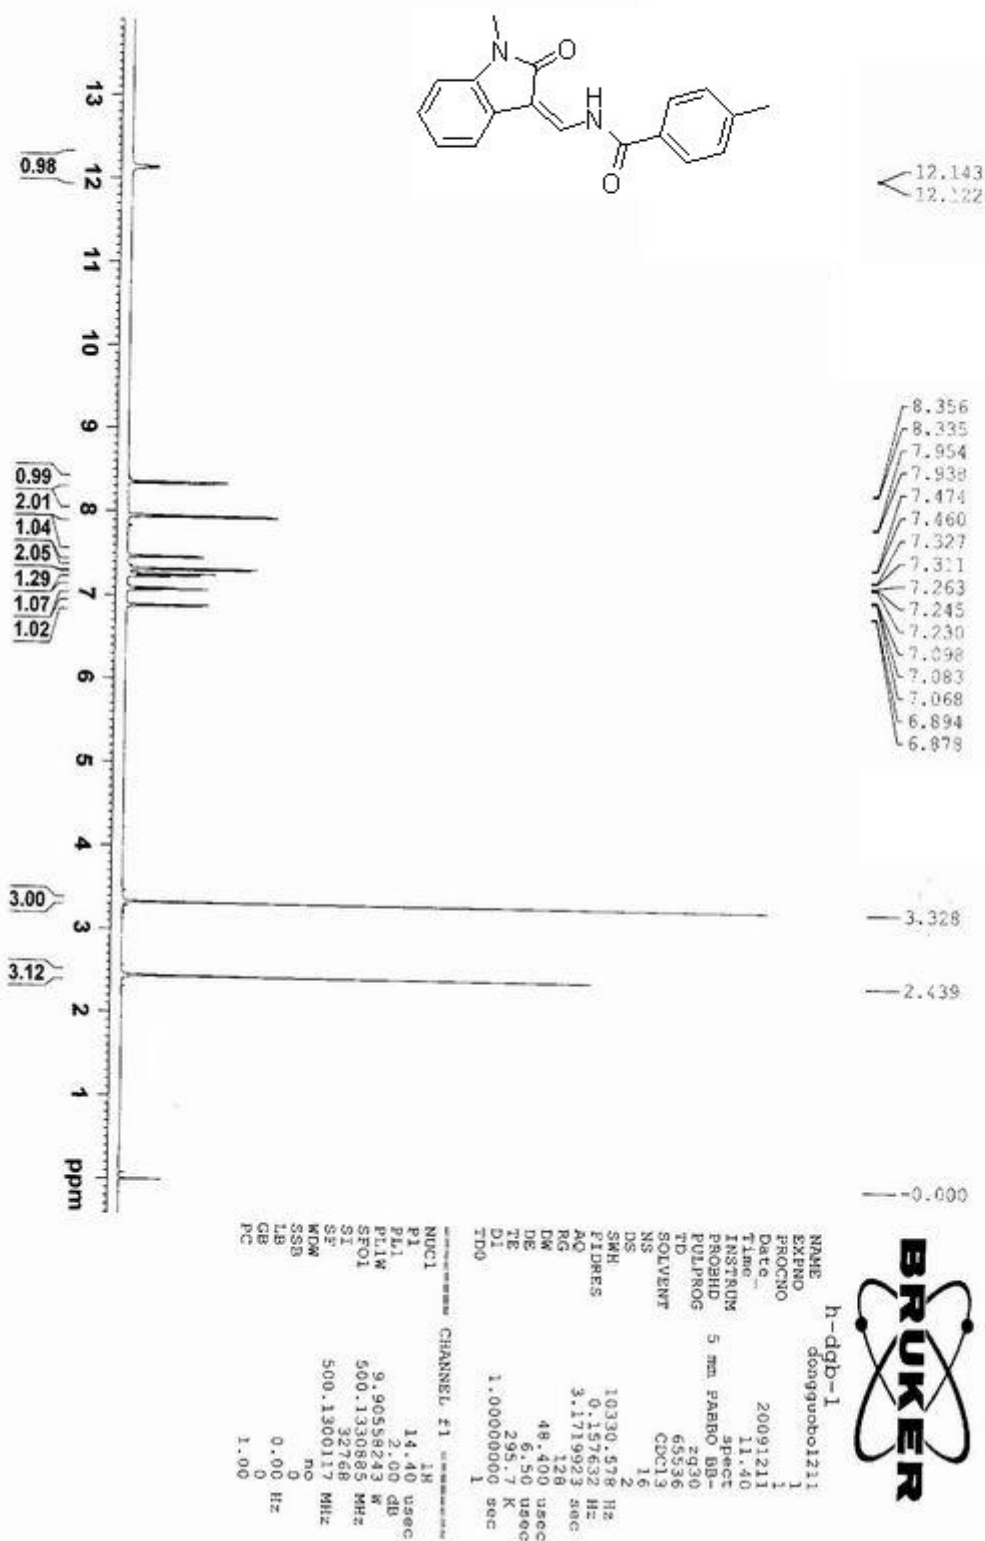

(Z)-4-Methyl-N-((1-methyl-2-oxoindolin-3-ylidene)methyl)benzamide (9)

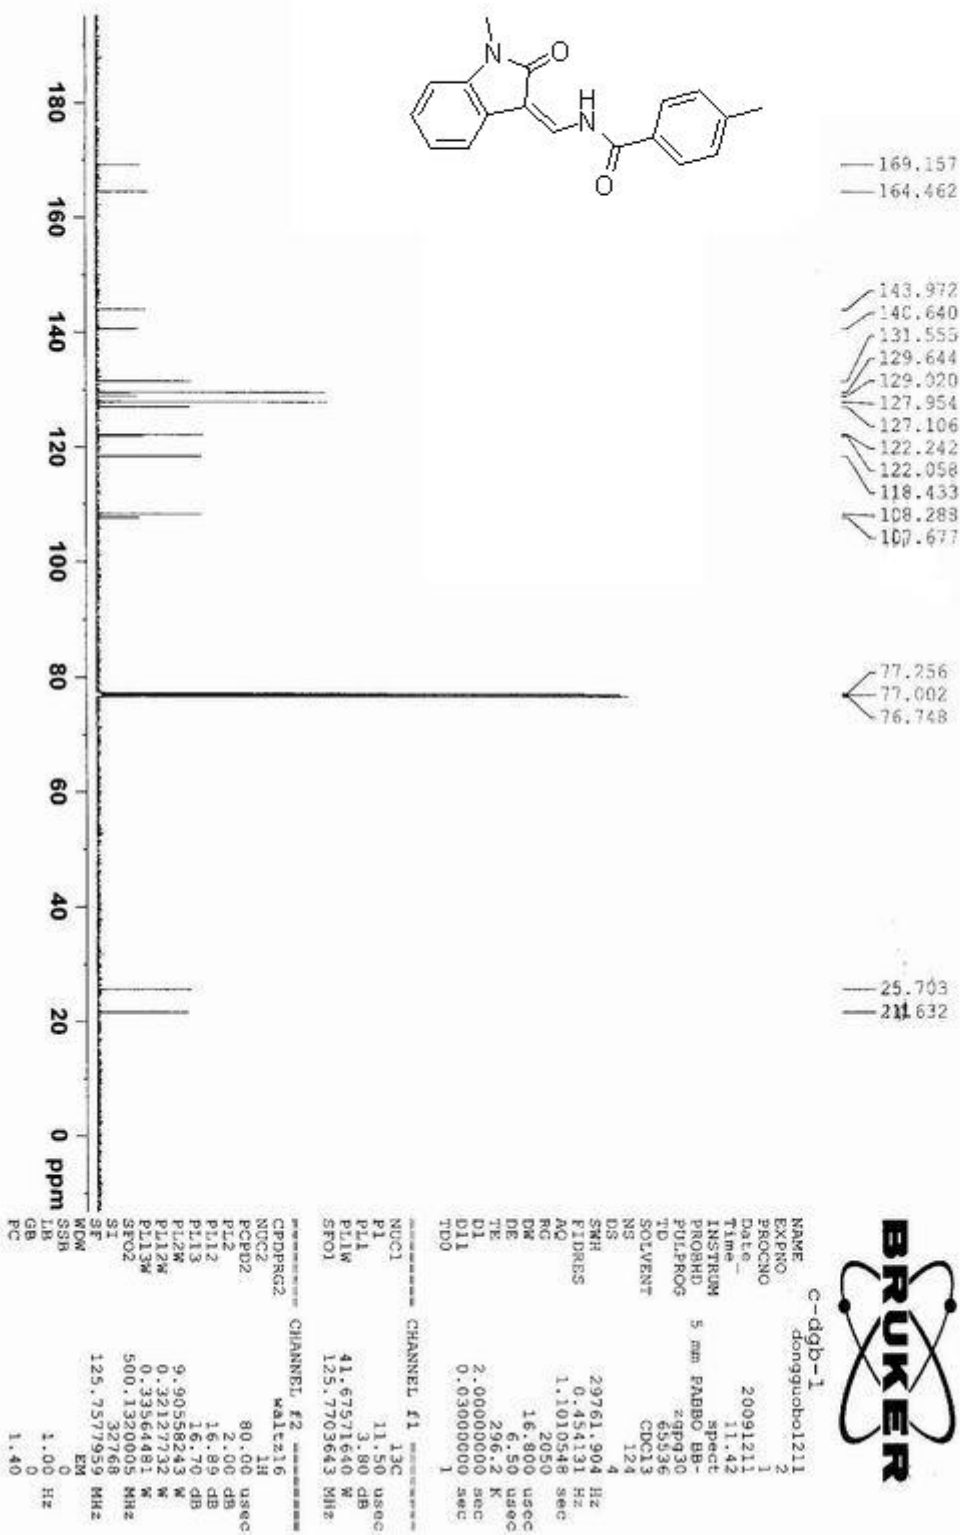

(Z)-3-Methyl-N-((1-methyl-2-oxindolin-3-ylidene)methyl)benzamide (10)

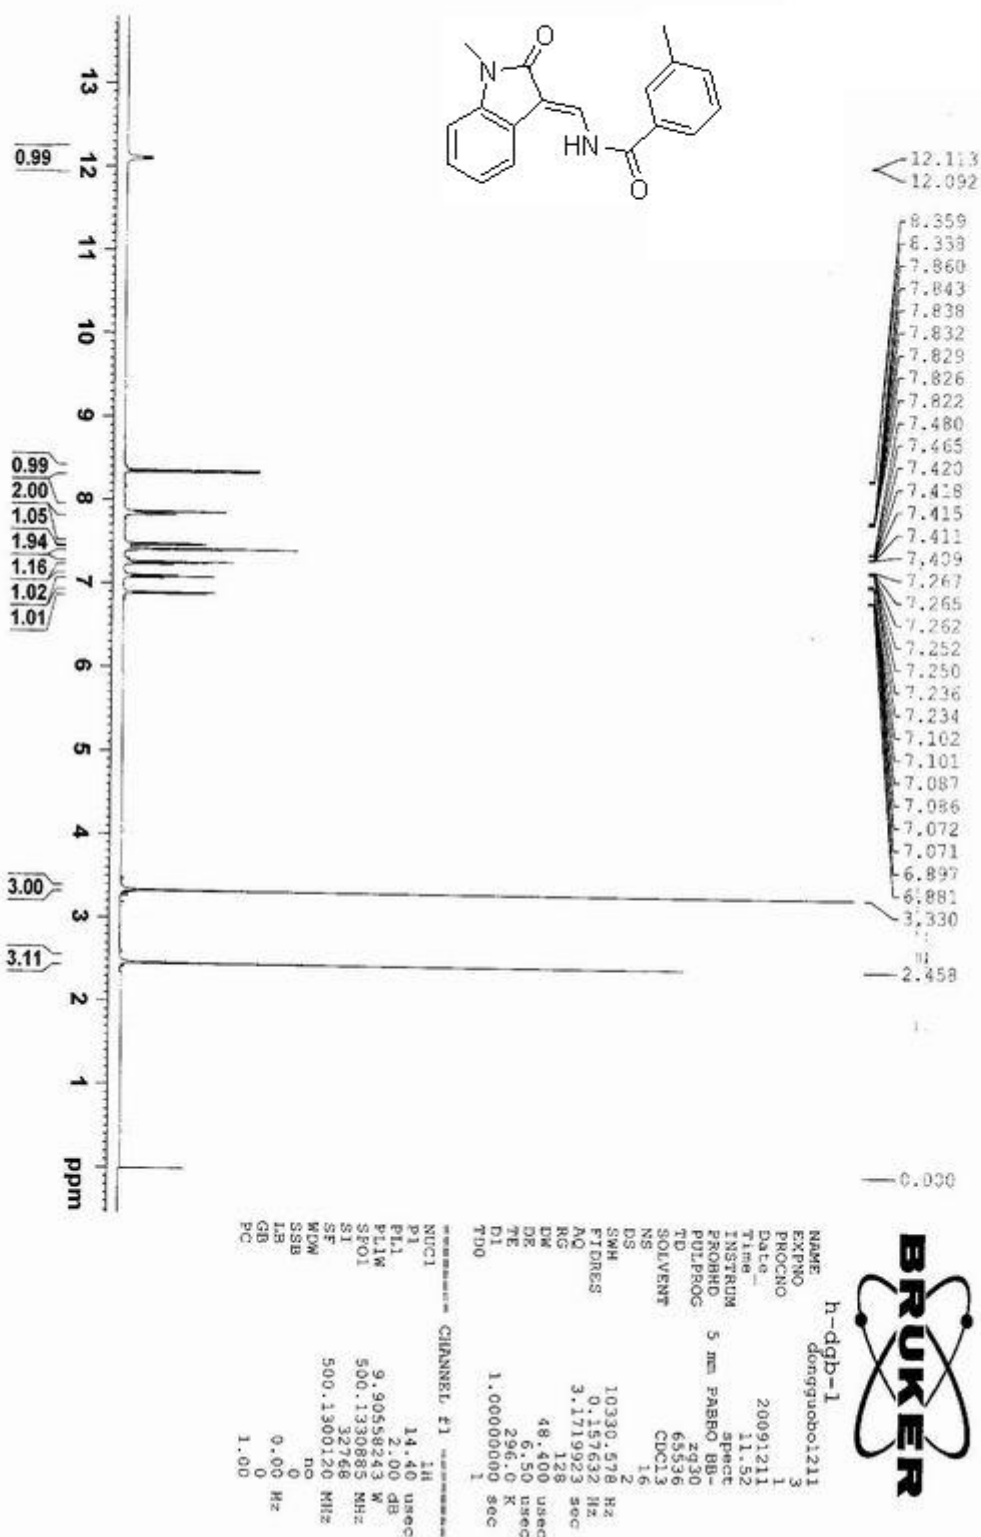

(Z)-3-Methyl-N-((1-methyl-2-oxindolin-3-ylidene)methyl)benzamide (10)

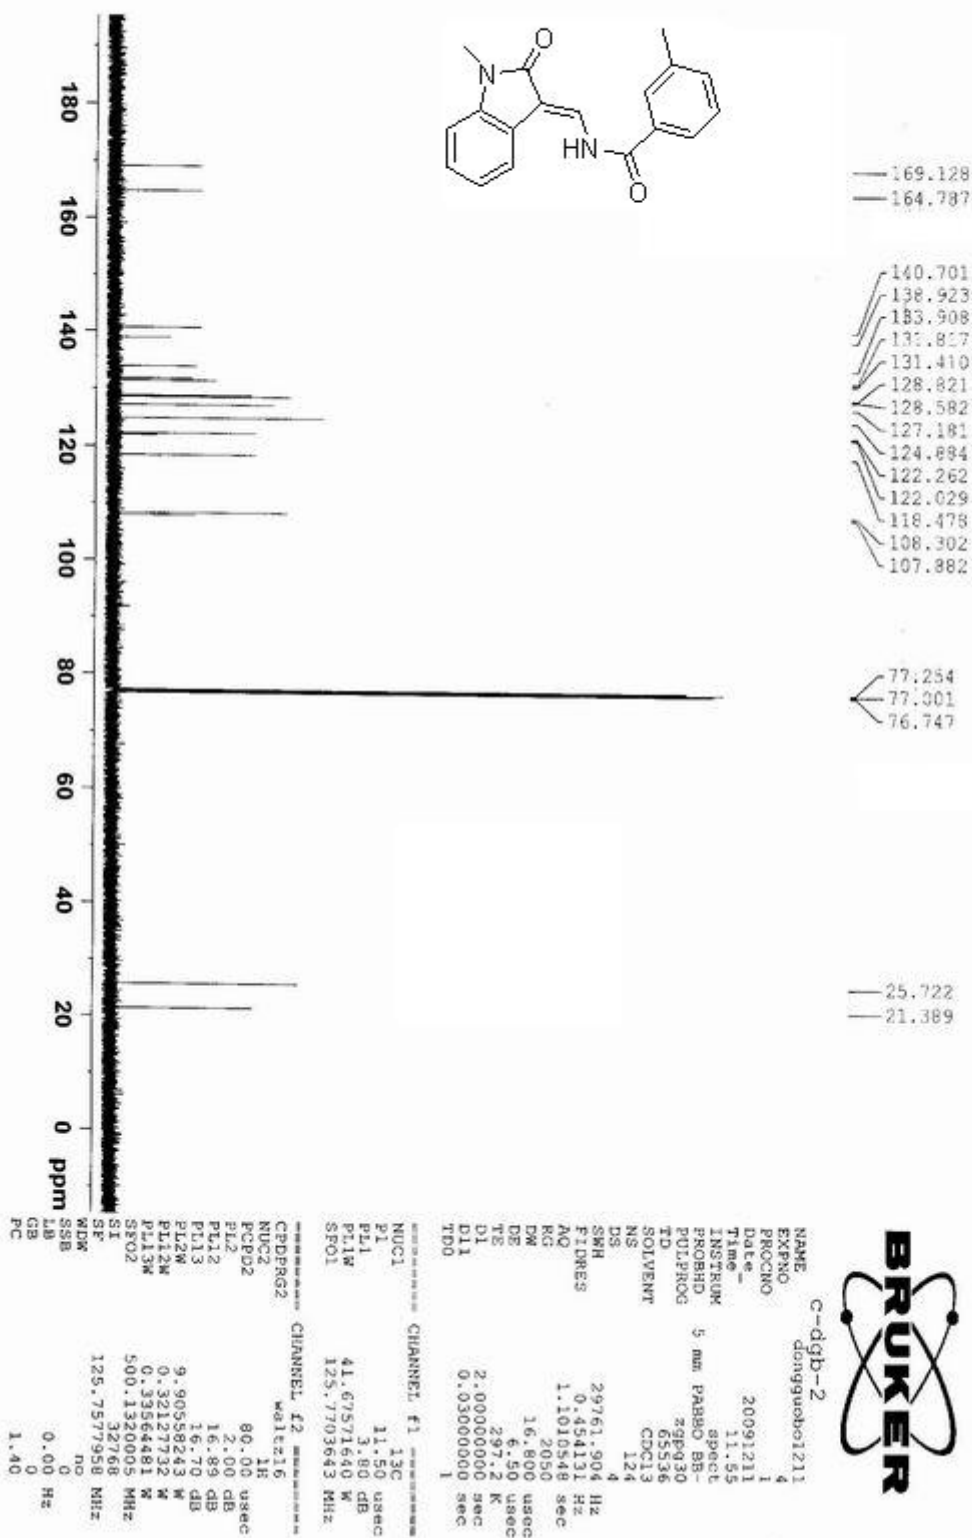

(Z)-4-Methoxy-N-((1-methyl-2-oxoindolin-3-ylidene)methyl)benzamide (11)

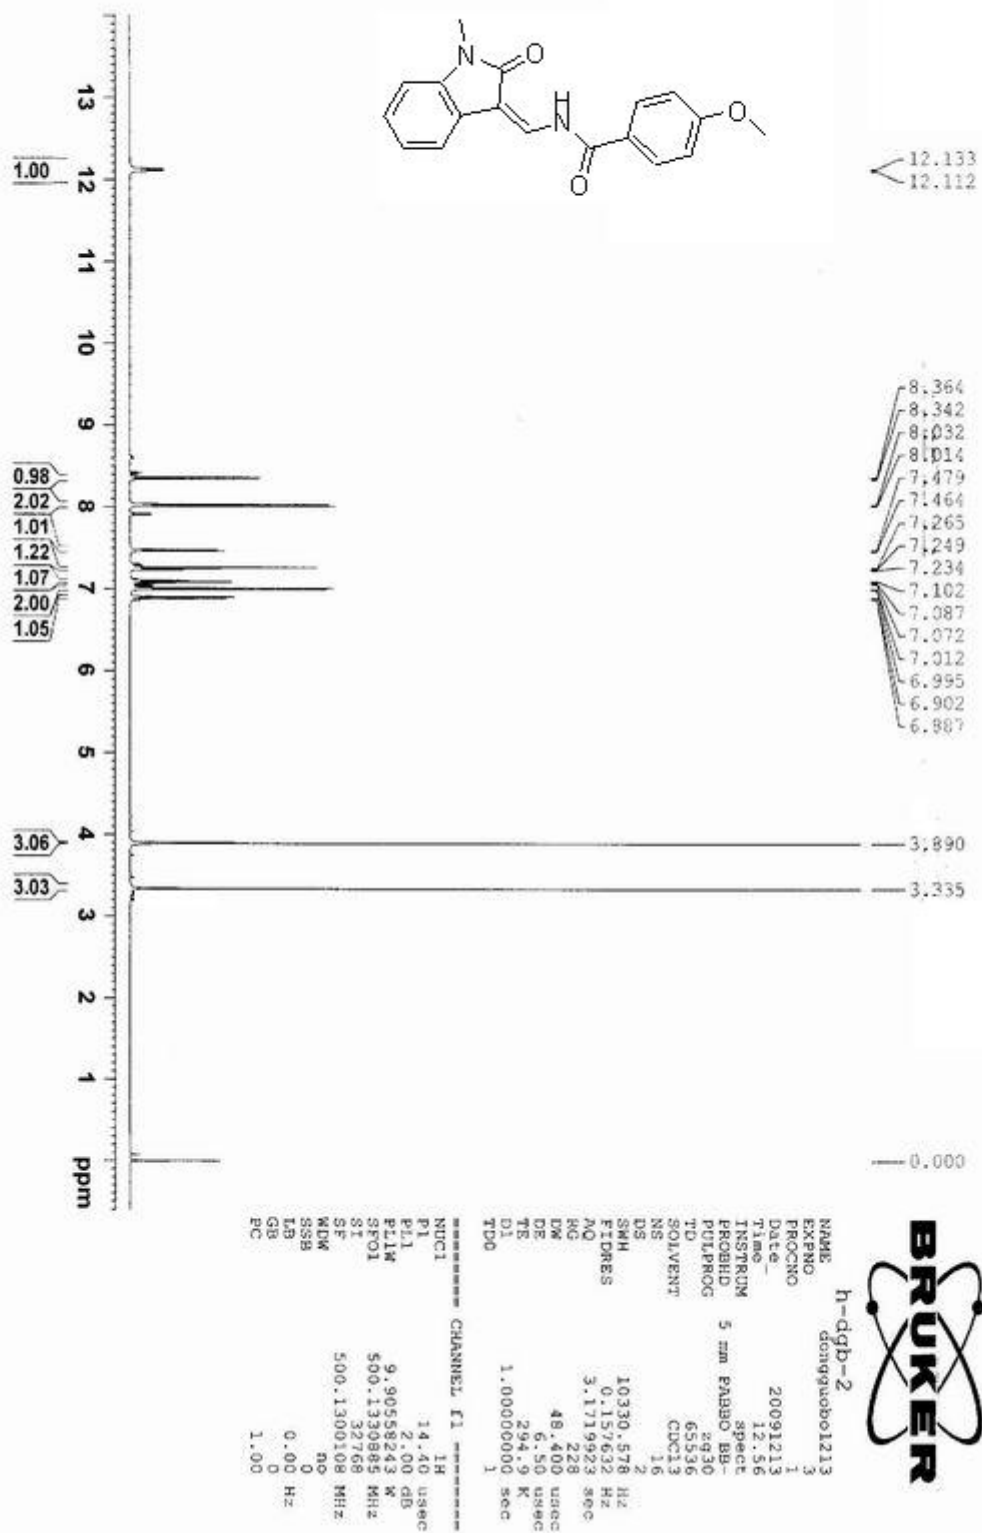

(Z)-4-Methoxy-N-((1-methyl-2-oxoindolin-3-ylidene)methyl)benzamide (11)

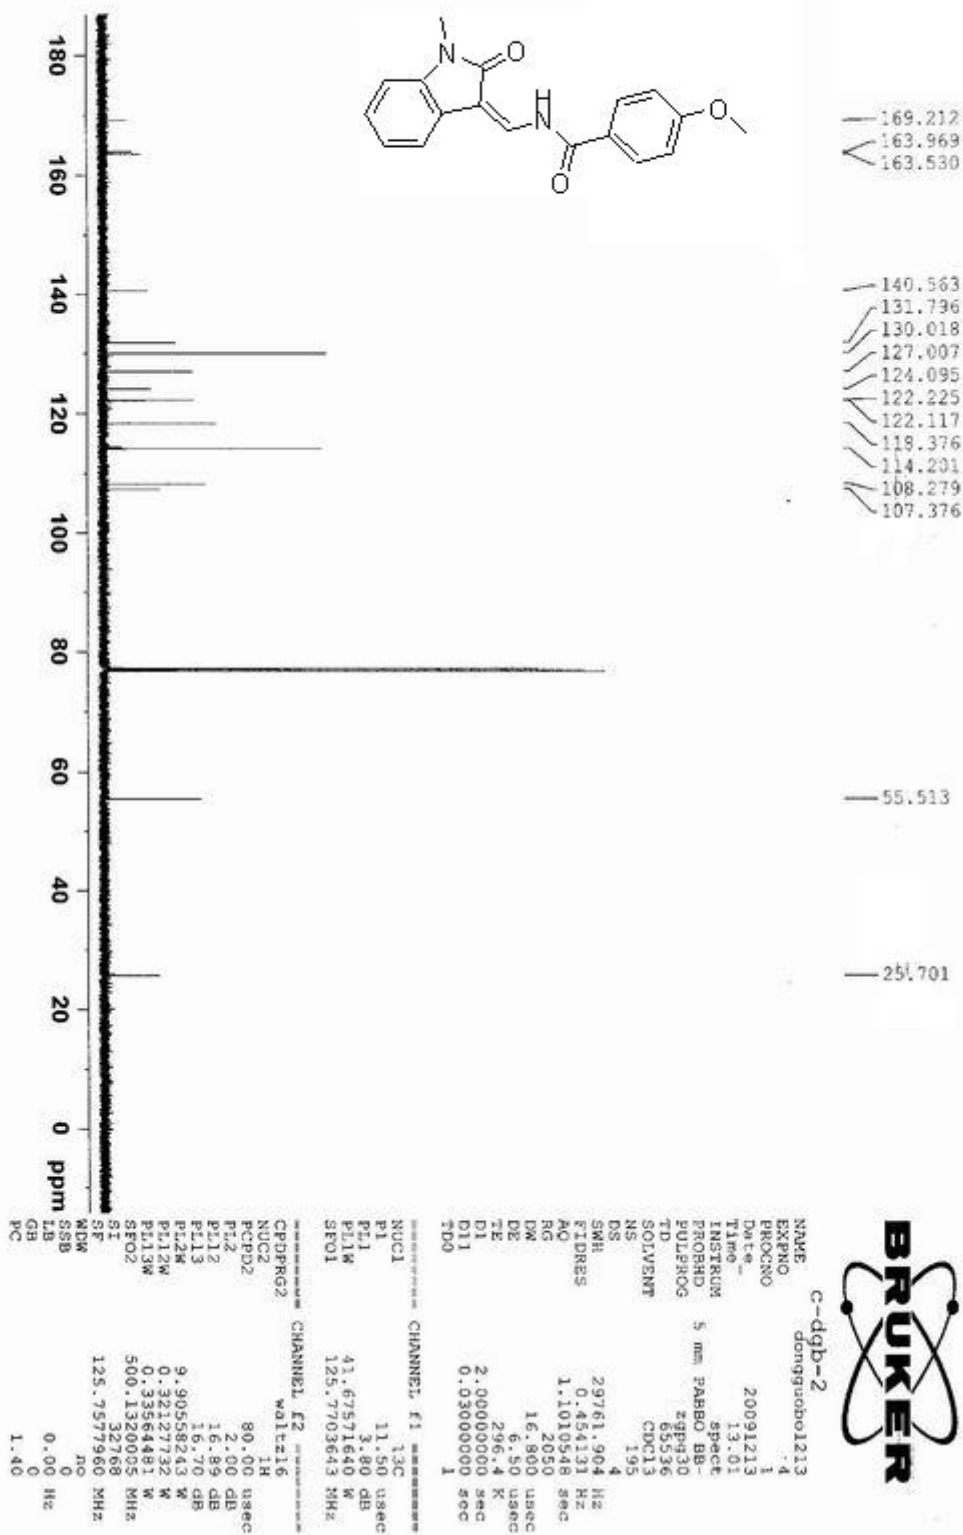

(Z)-2-Methoxy-N-((1-methyl-2-oxoindolin-3-ylidene)methyl)benzamide (12)

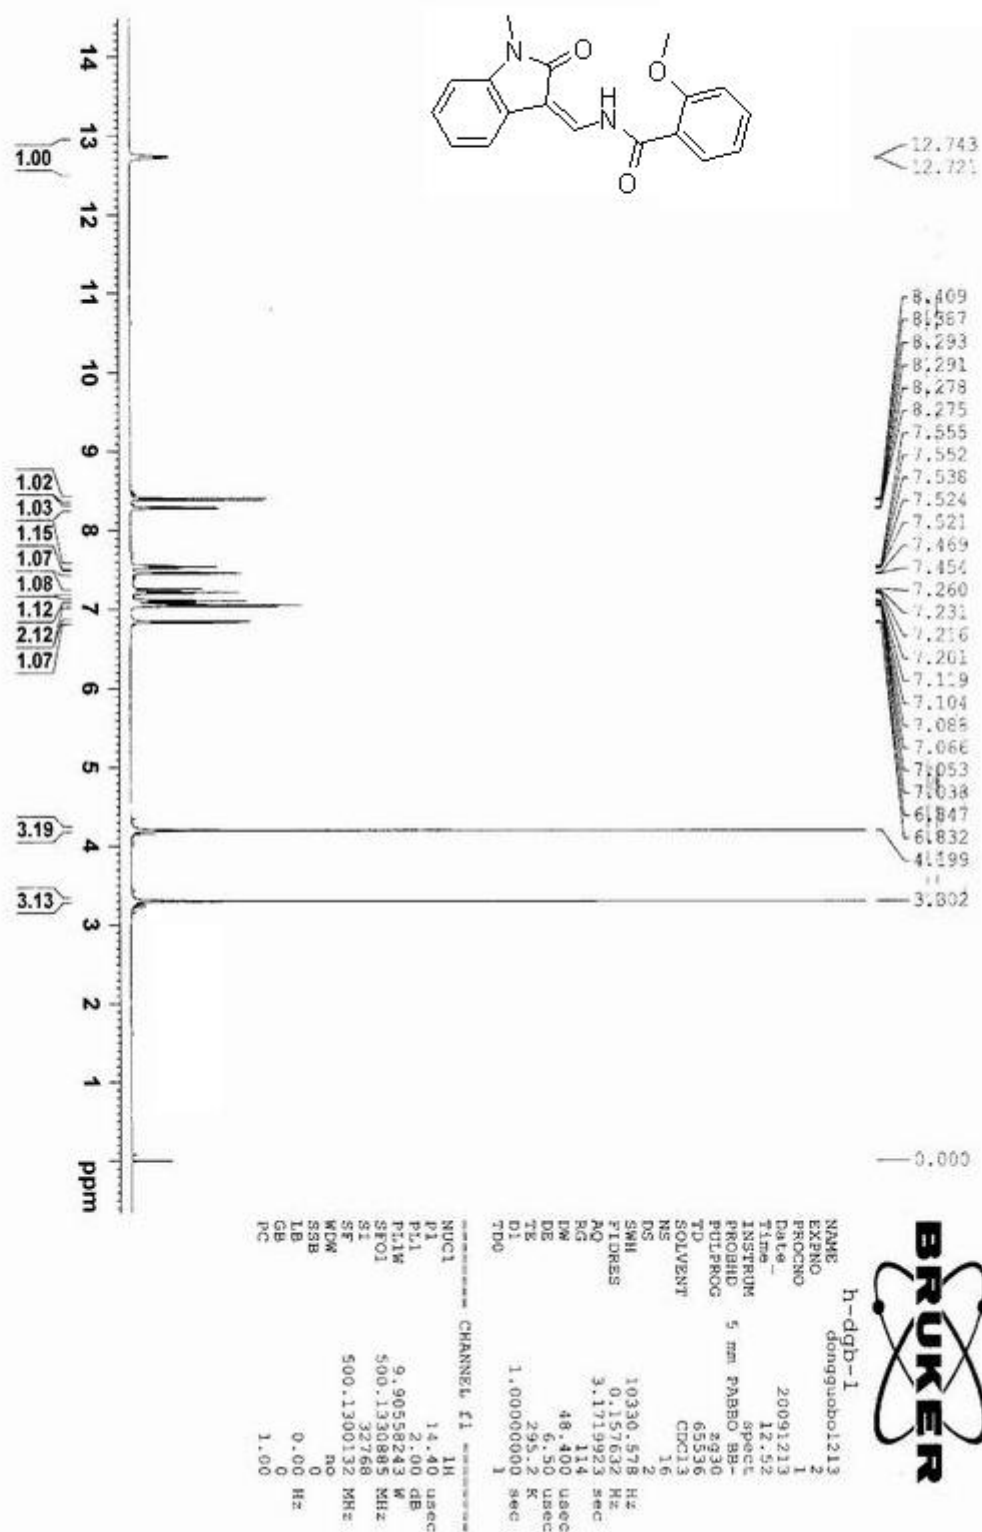



(Z)-2-Methoxy-N-((1-methyl-2-oxoindolin-3-ylidene)methyl)benzamide (12)

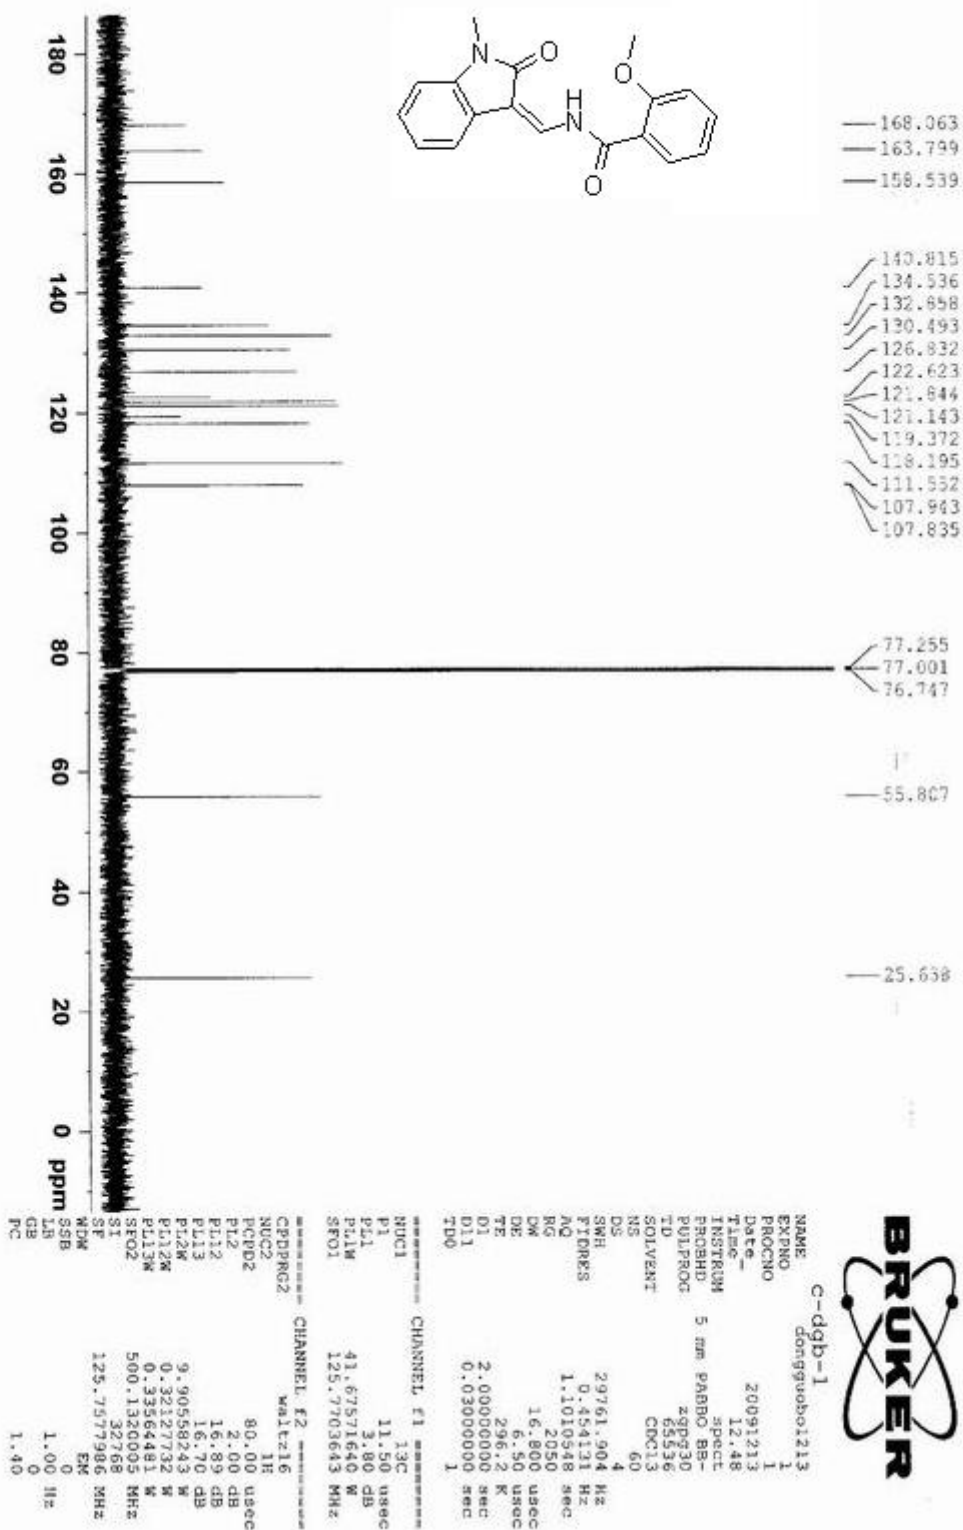

(Z)-4-Chloro-N-((1-methyl-2-oxindolin-3-ylidene)methyl)benzamide (13)

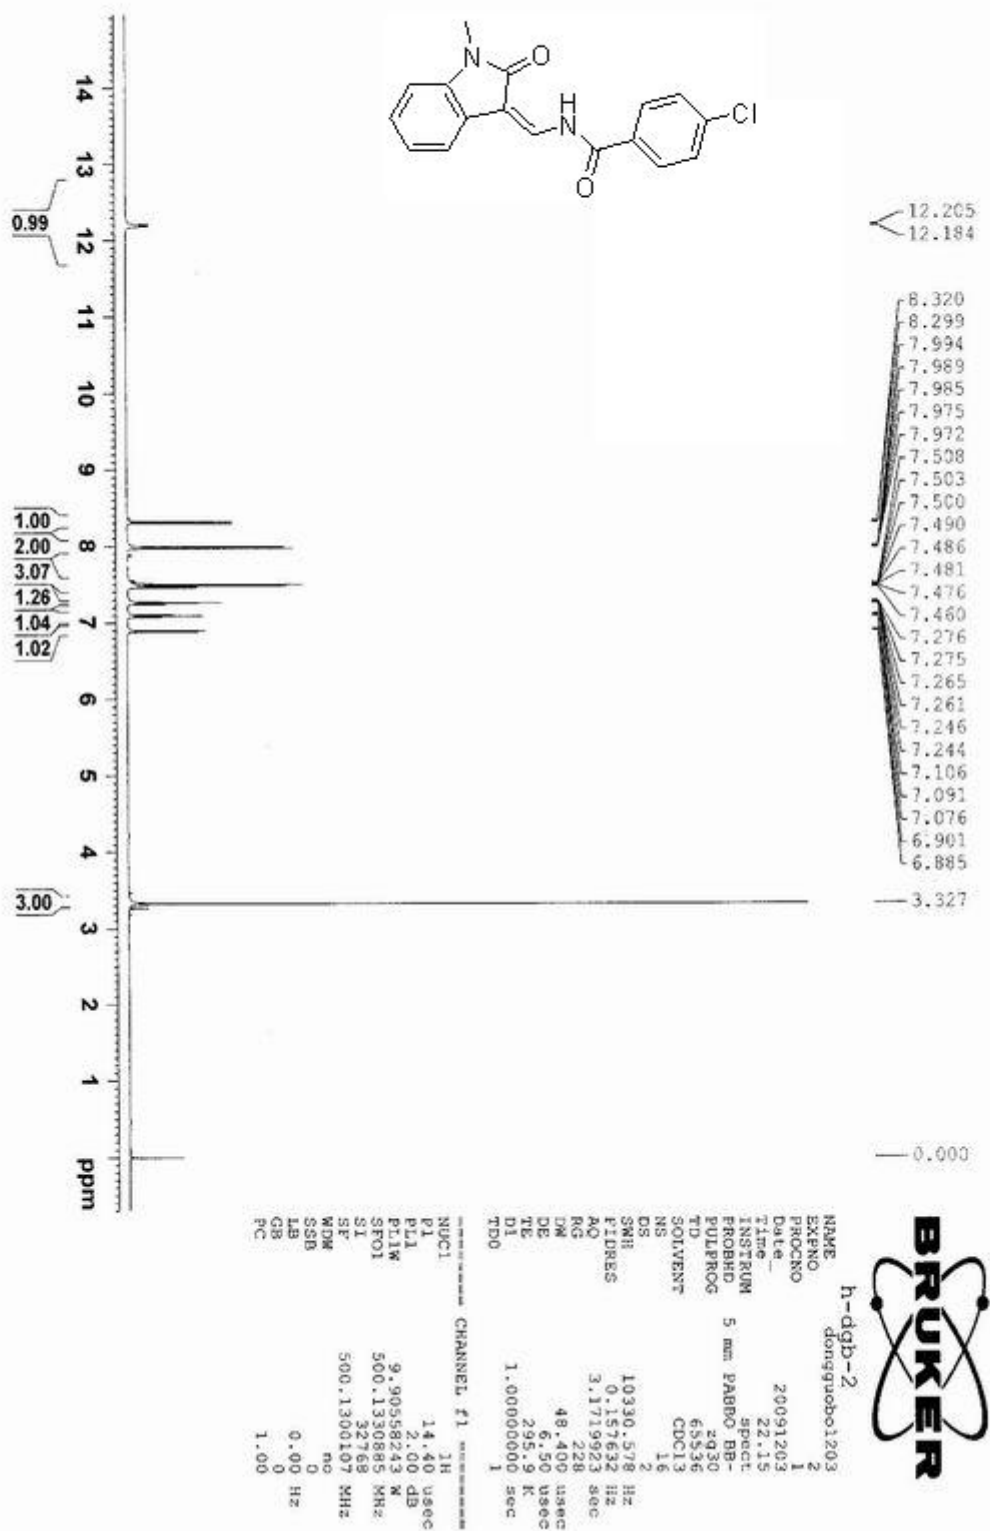

(Z)-4-Chloro-N-((1-methyl-2-oxindolin-3-ylidene)methyl)benzamide (13)

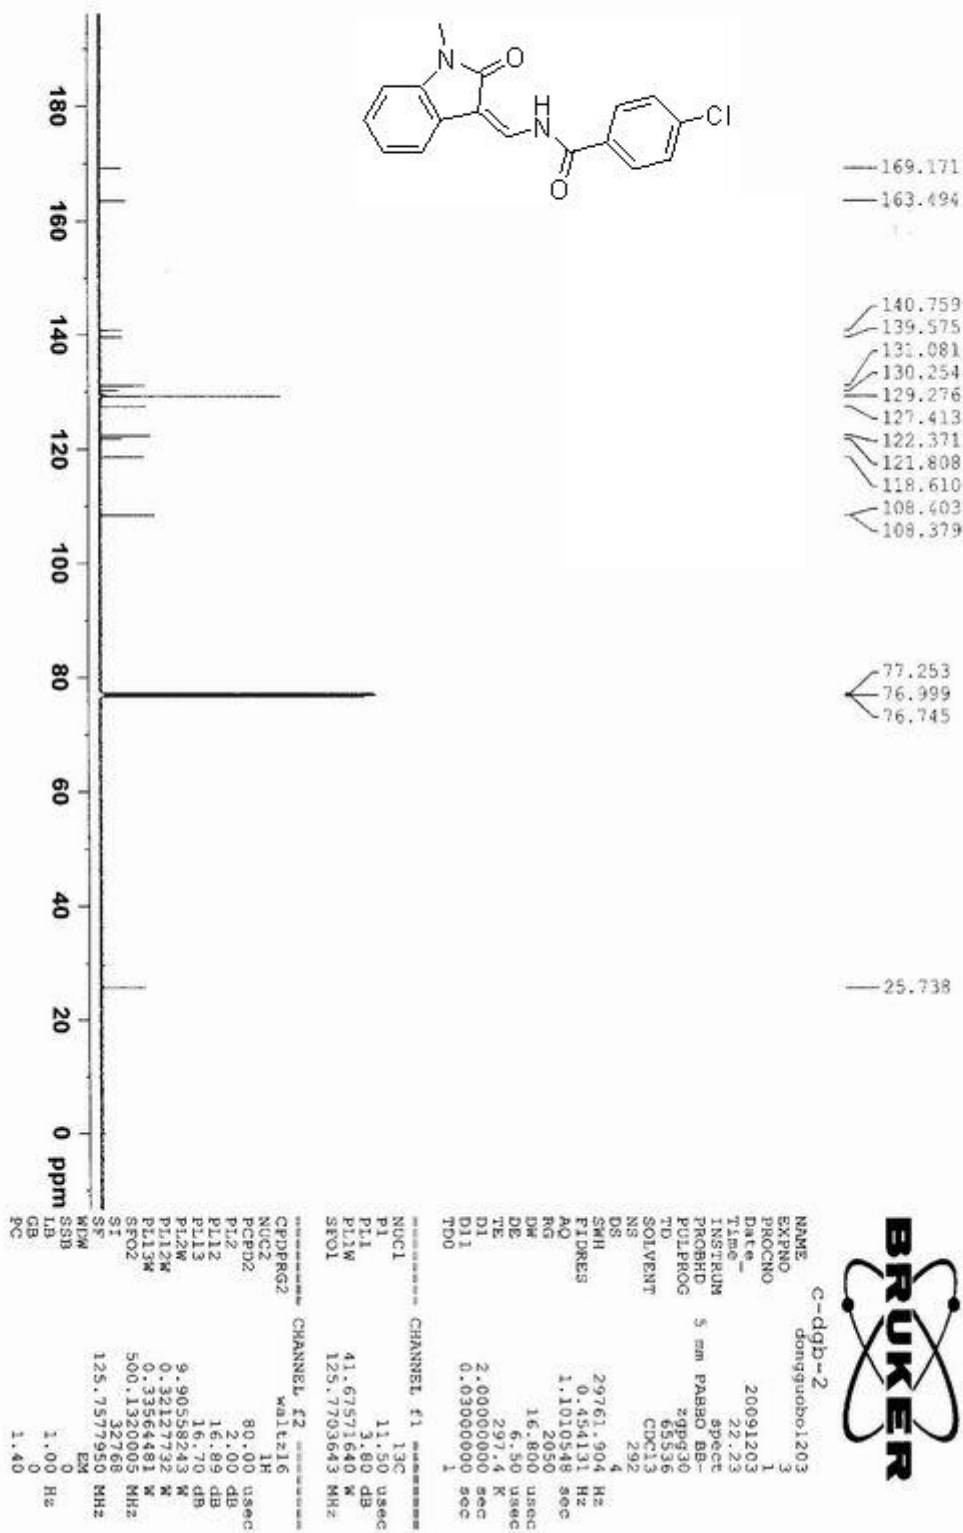

(Z)-2-Bromo-N-((1-methyl-2-oxindolin-3-ylidene)methyl)benzamide (14)

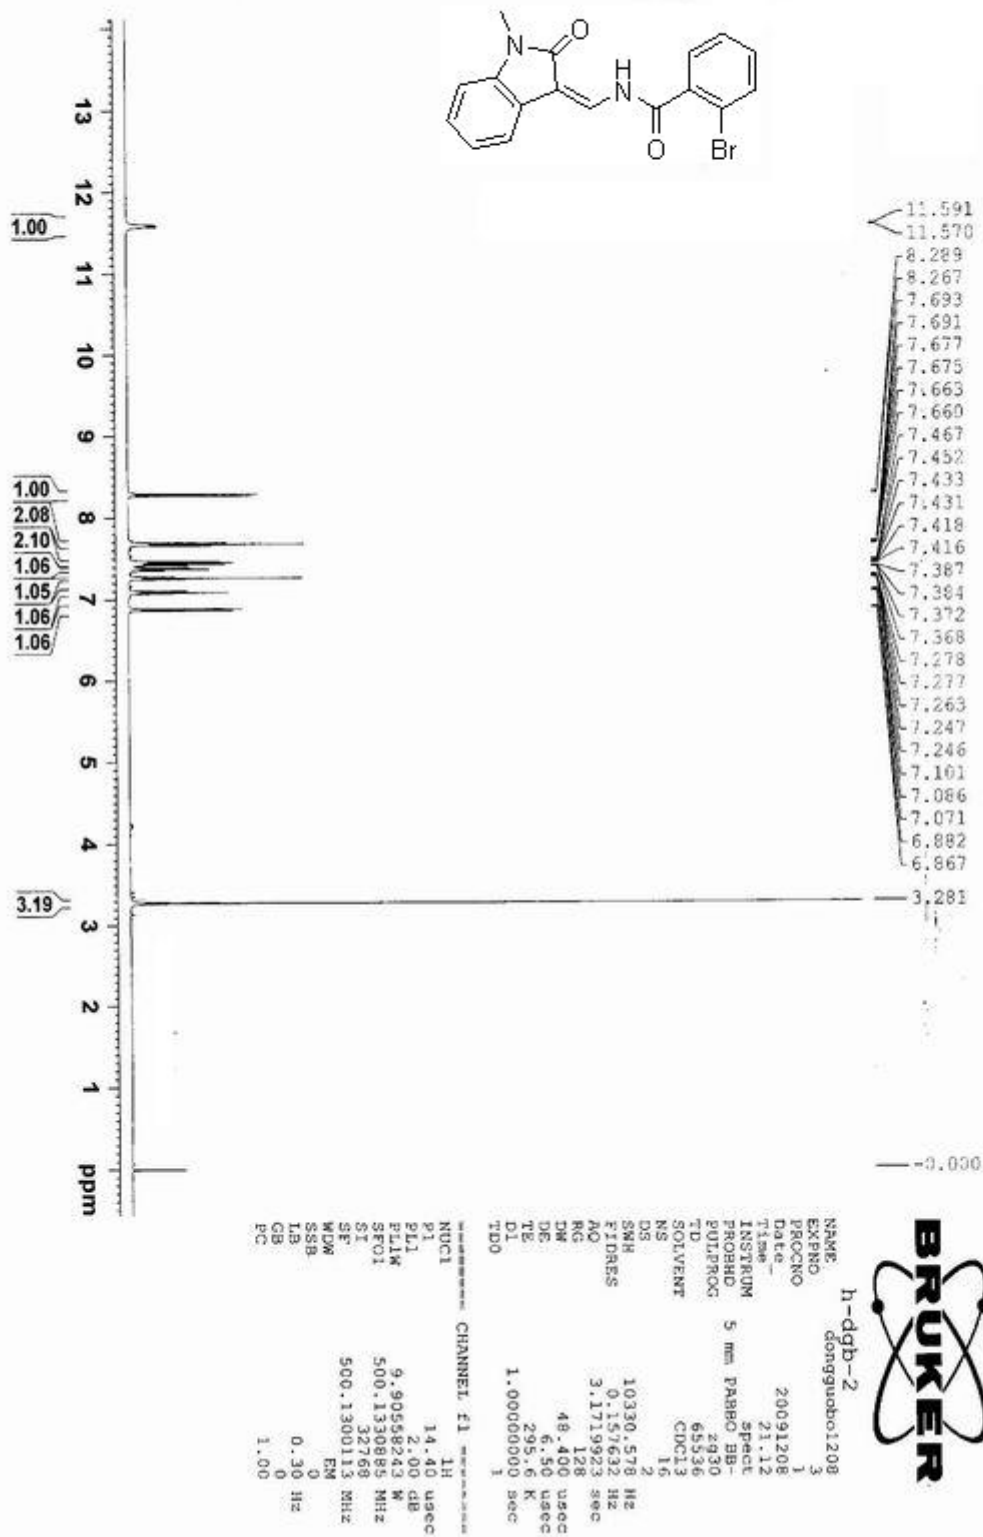

(Z)-2-Bromo-N-((1-methyl-2-oxindolin-3-ylidene)methyl)benzamide (14)

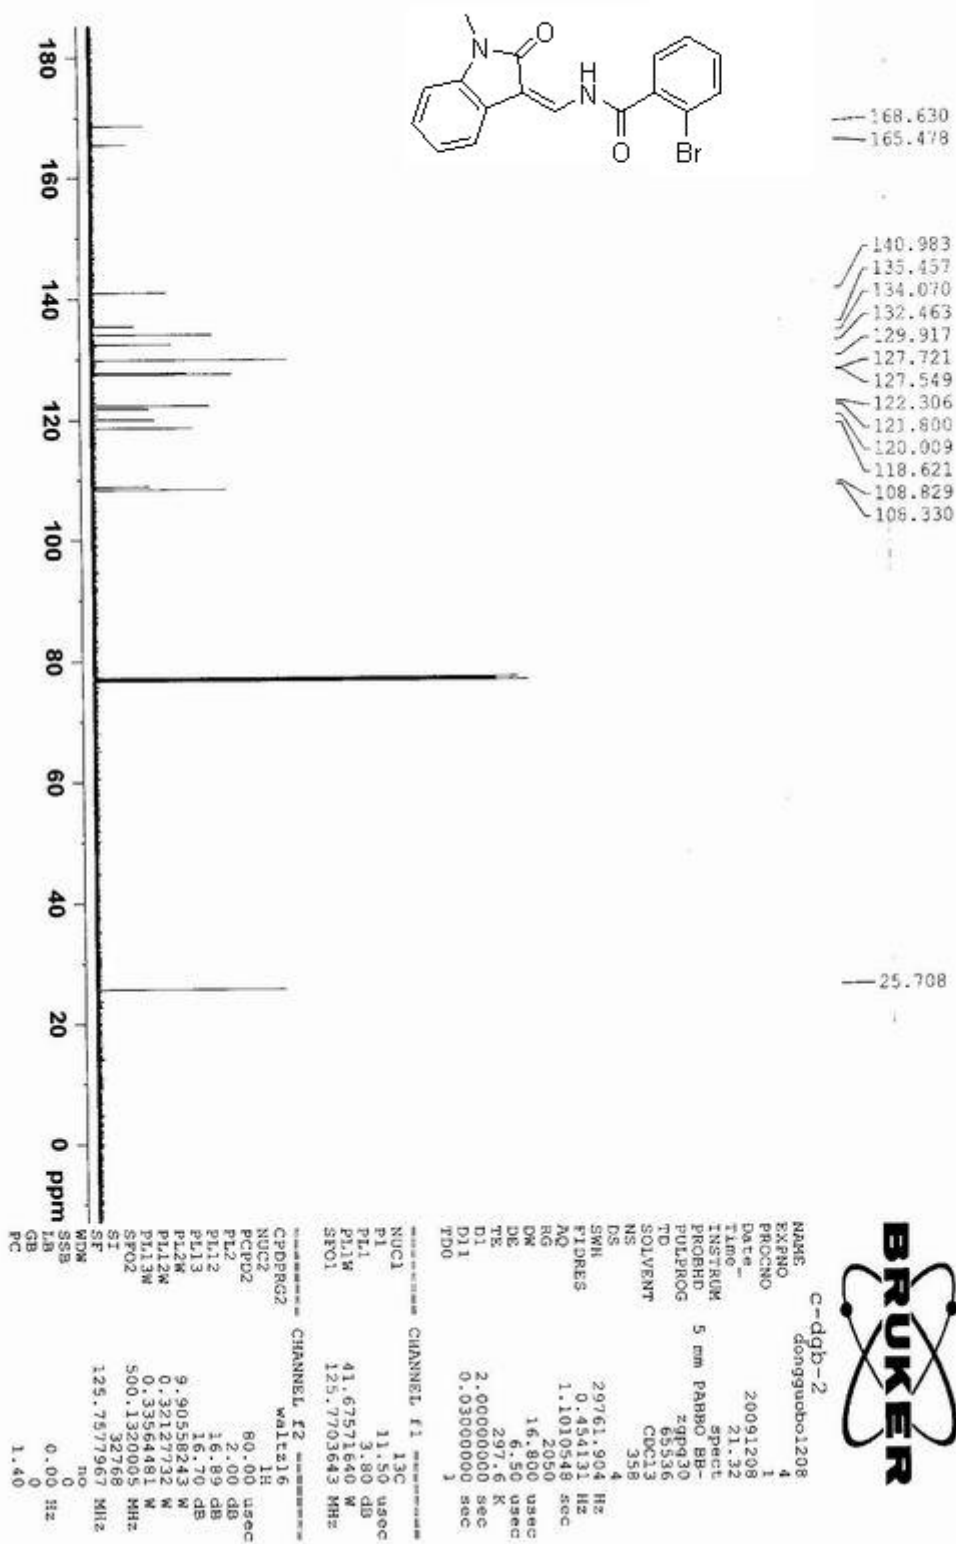

(Z)-5-Methyl-N-((1-methyl-2-oxindolin-3-ylidene)methyl)picolinamide (15)

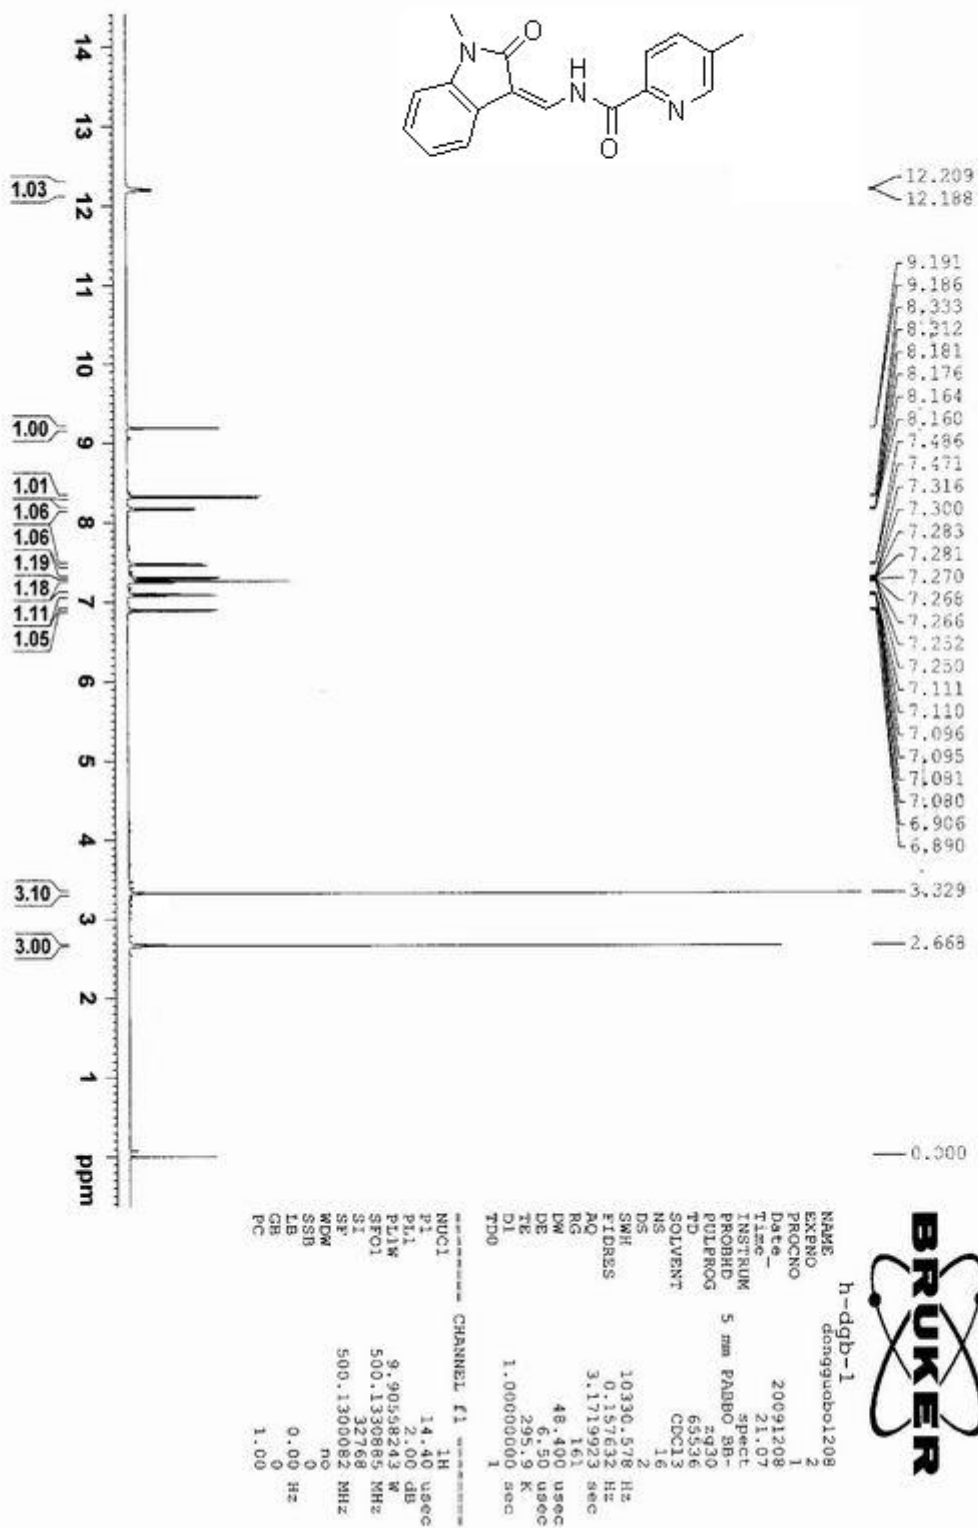

(Z)-5-Methyl-N-((1-methyl-2-oxindolin-3-ylidene)methyl)picolinamide (15)

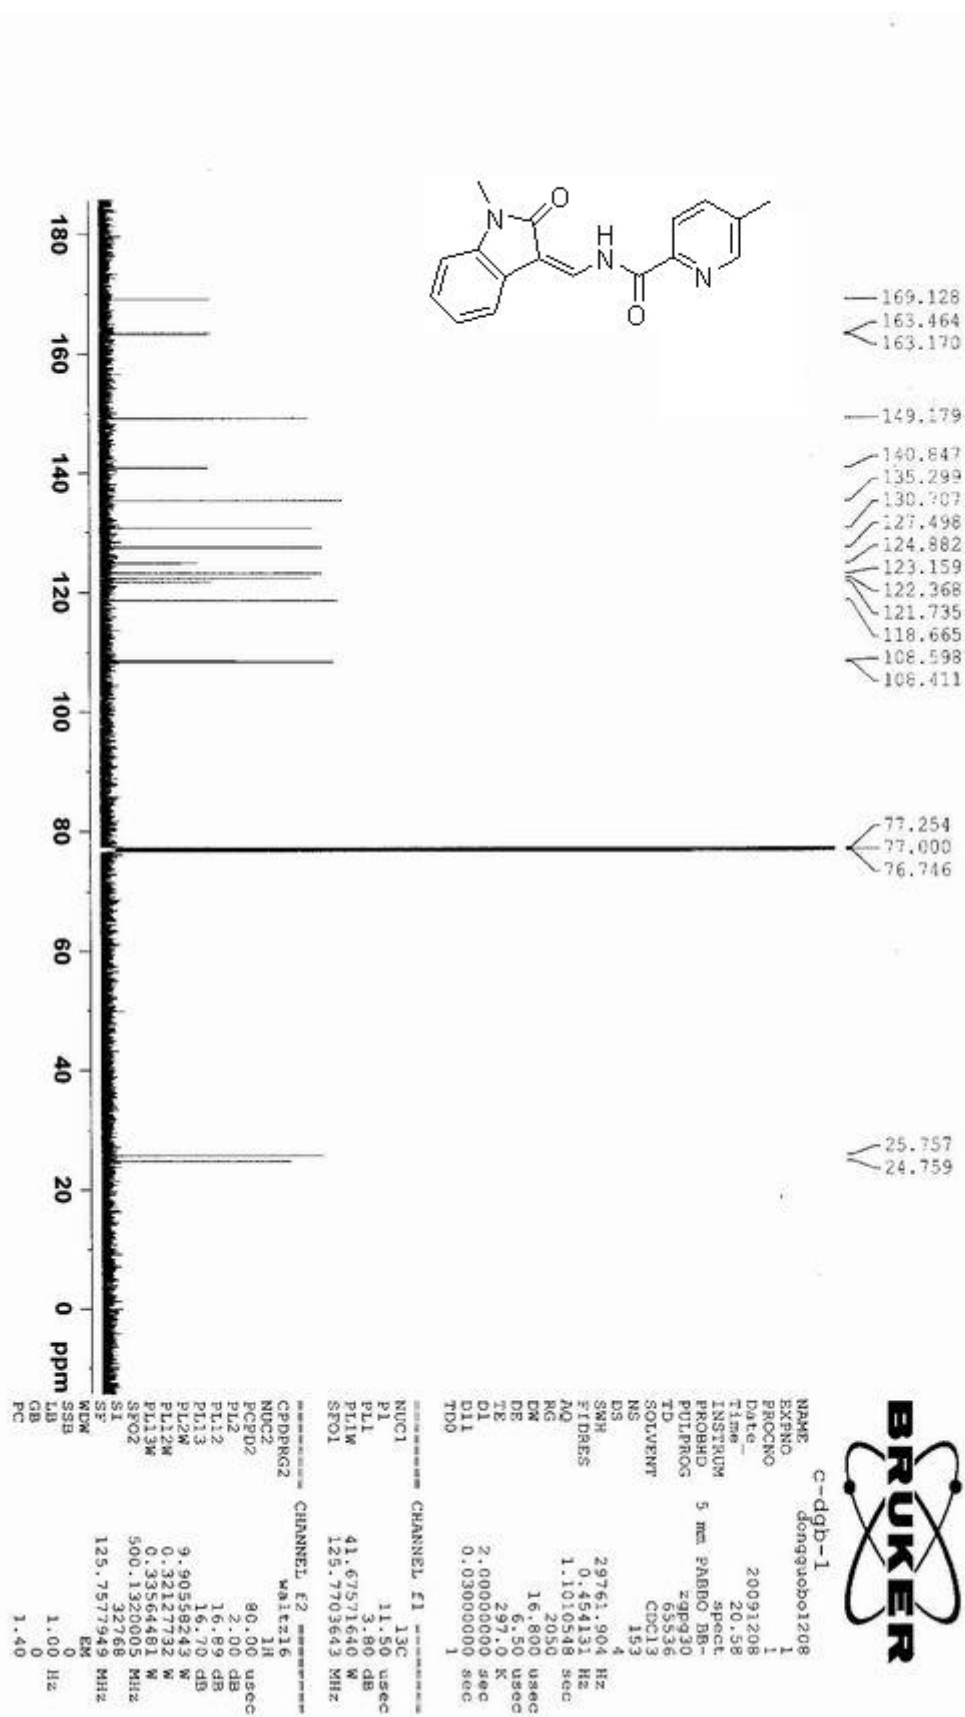

(Z)-N-((1-Methyl-2-oxindolin-3-ylidene)methyl)acrylamide (16)

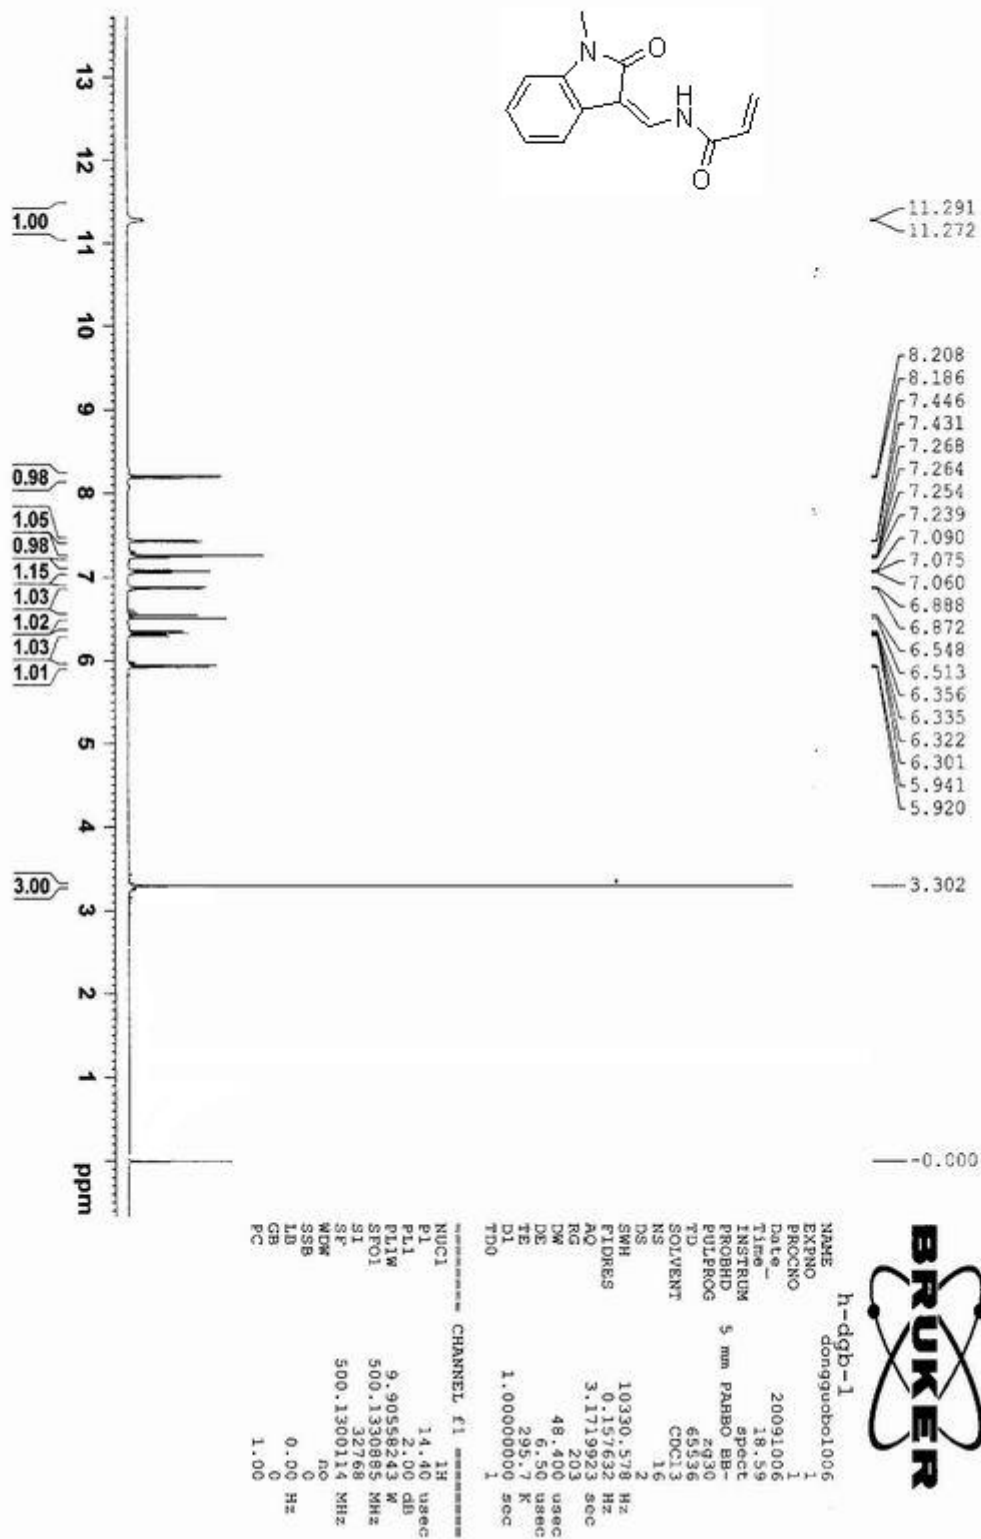



(Z)-N-((1-Methyl-2-oxindolin-3-ylidene)methyl)acrylamide (16)

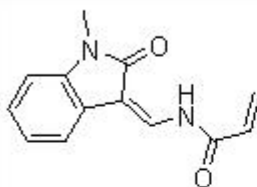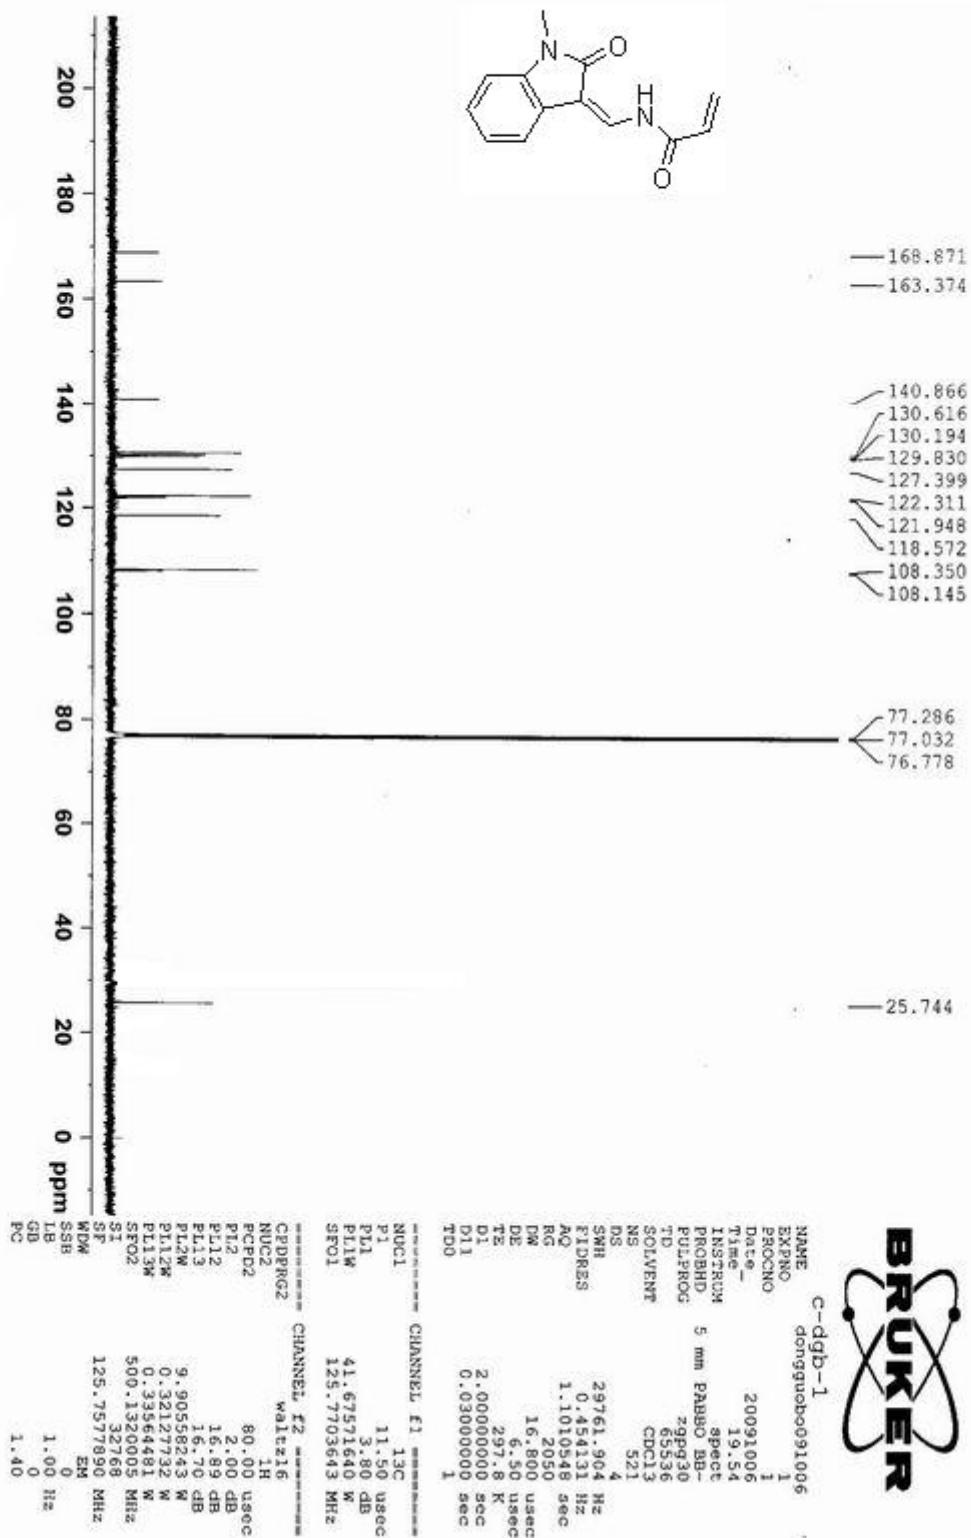

(Z)-N-((1-Methyl-2-oxoindolin-3-ylidene)methyl)acetamide (17)

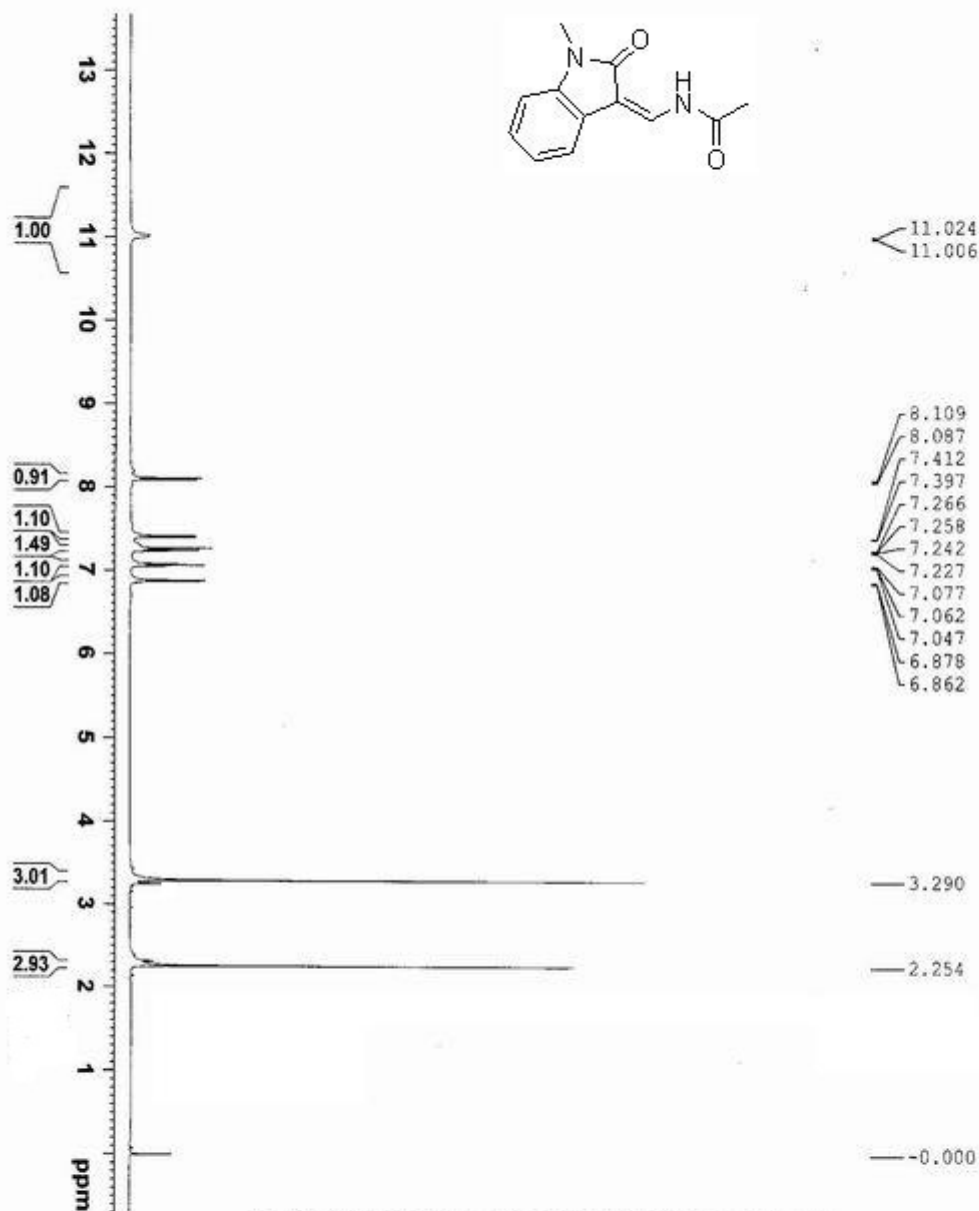

NAME h-dgb-2  
 EXPNO 3  
 PROCNO 1  
 Date\_ 20090930  
 Time 14.48  
 INSTRUM spect  
 PROBRD 5 mm PABBO BB-  
 PULPROG zg30  
 TD 65536  
 SOLVENT CDCl3  
 NS 16  
 DS 2  
 SWH 10330.578 Hz  
 FIDRES 0.157632 Hz  
 AQ 3.171923 sec  
 RG 203  
 DW 48.400 usec  
 DE 6.50 usec  
 TE 297.3 K  
 D1 1.00000000 sec  
 TDO 1

CHANNEL F1  
 NUQC1 1H  
 P1 14.40 usec  
 PL1 2.00 dB  
 PL1W 9.90558243 W  
 SF01 500.1330885 MHz  
 SI 32768  
 SF 500.1300103 MHz  
 WDM EM  
 SSB 0  
 LB 0.30 Hz  
 GB 0  
 PC 1.00

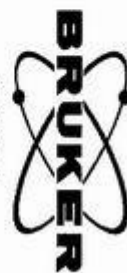

(Z)-N-((1-Methyl-2-oxoindolin-3-ylidene)methyl)acetamide (17)

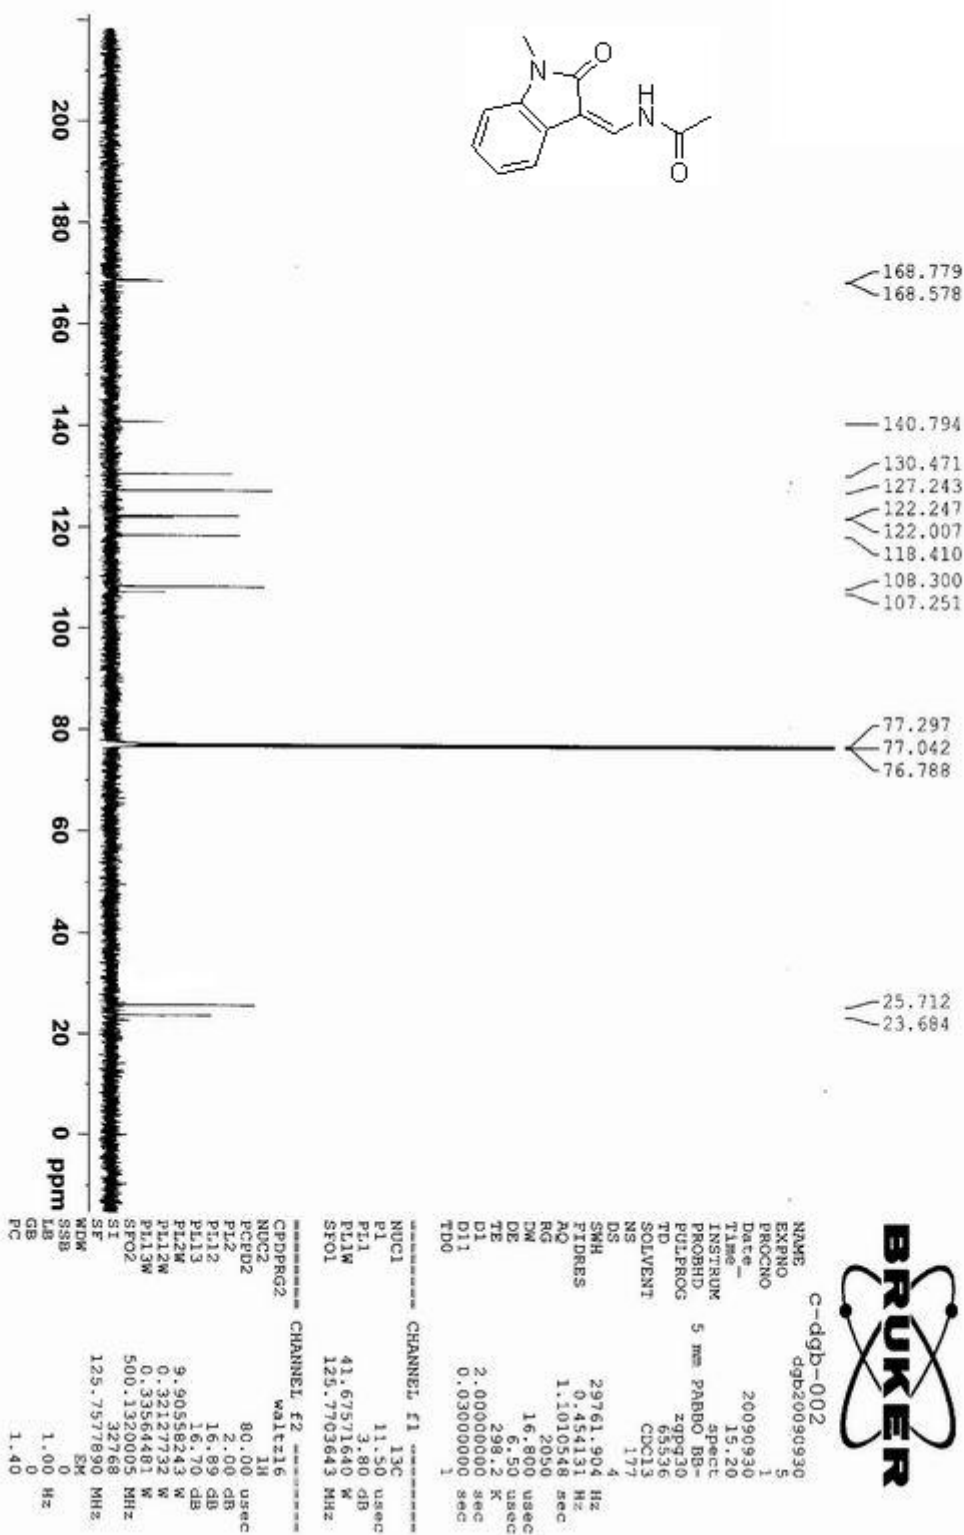

(Z)-Methyl-N-(1-methyl-2-oxindolin-3-ylidene)methylcarbamate (18)

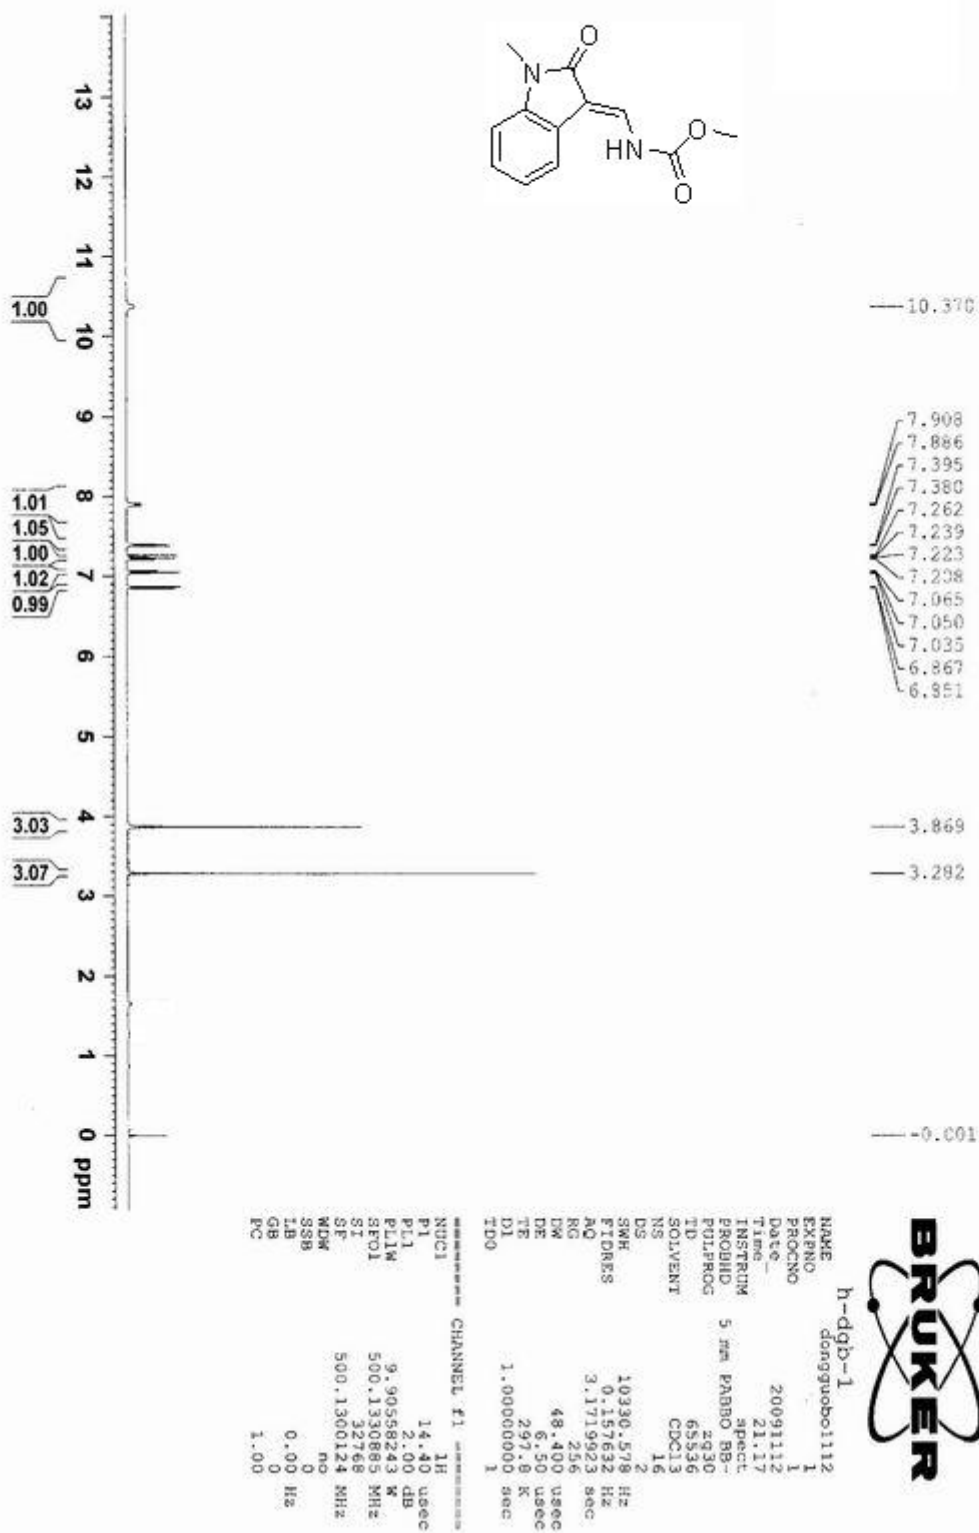

(Z)-Methyl-N-(1-methyl-2-oxindolin-3-ylidene)methylcarbamate (18)

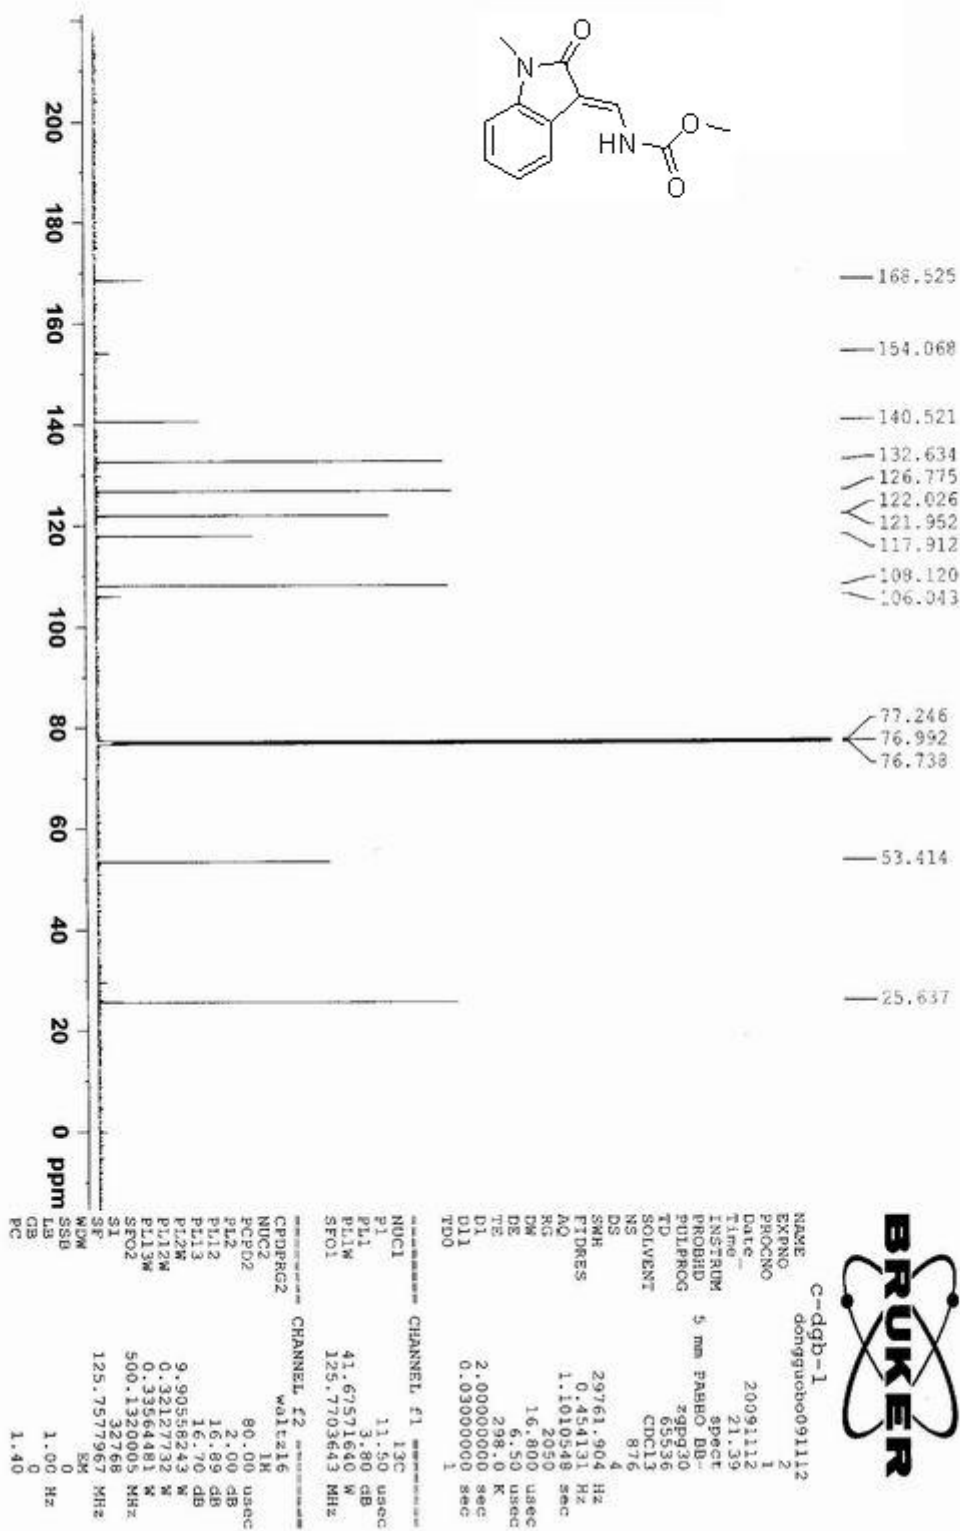

(Z)-Benzyl-N-(1-methyl-2-oxindolin-3-ylidene)methylcarbamate (19)

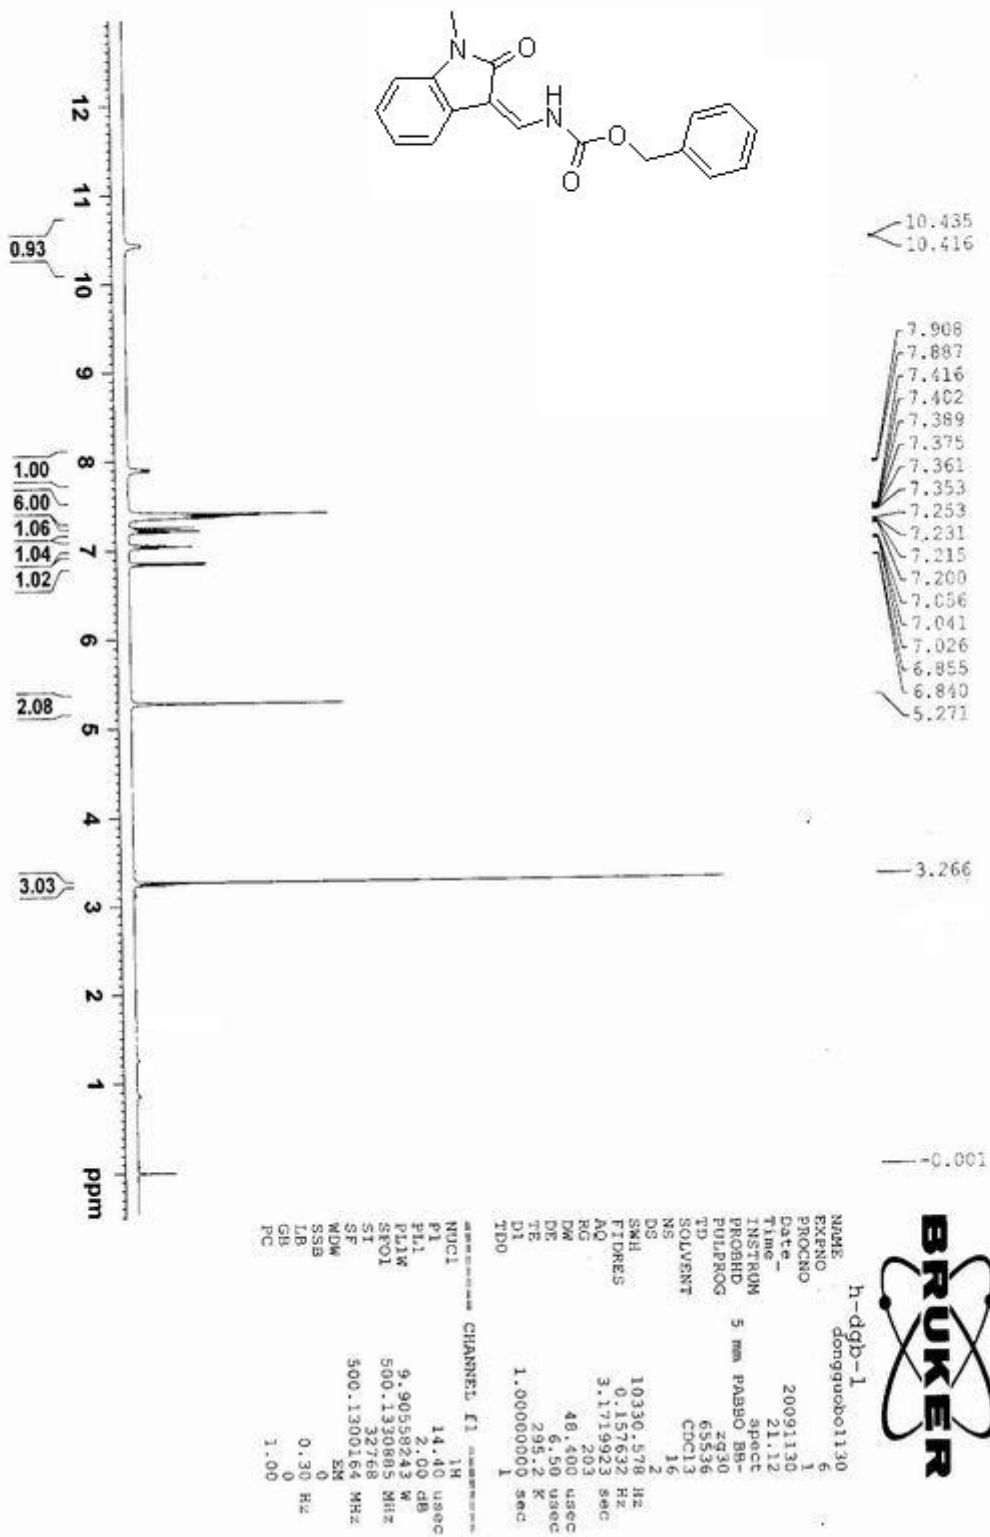

(Z)-Benzyl-N-(1-methyl-2-oxindolin-3-ylidene)methylcarbamate (19)

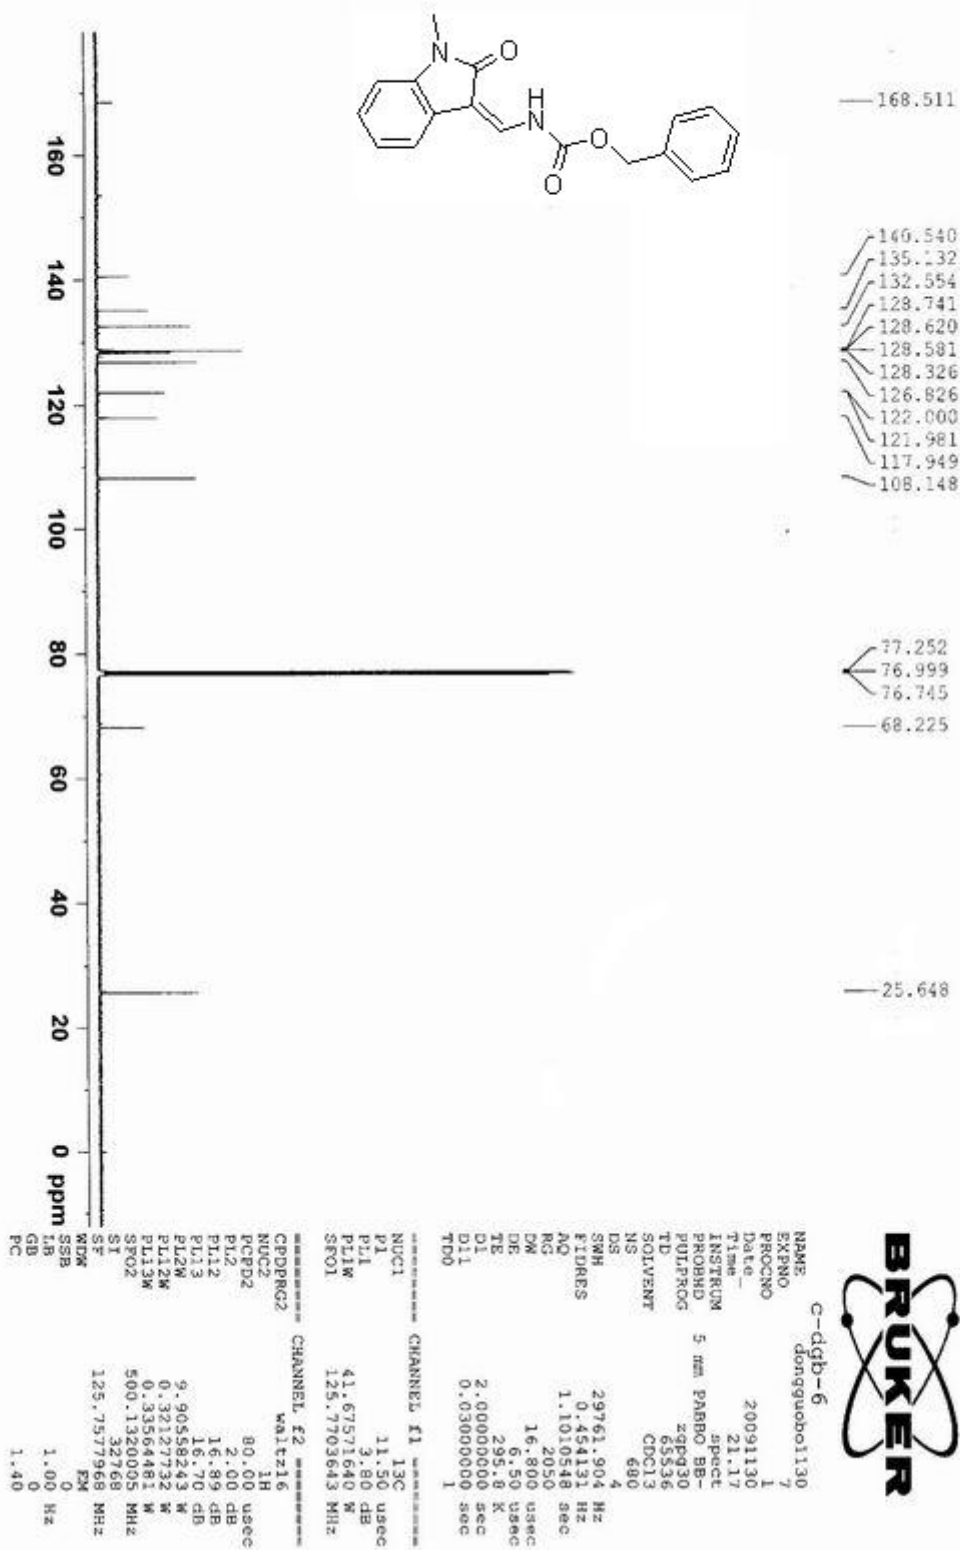

(Z) and (E)-1-Methyl-3-((phenylamino)methylene)indolin-2-one (20)

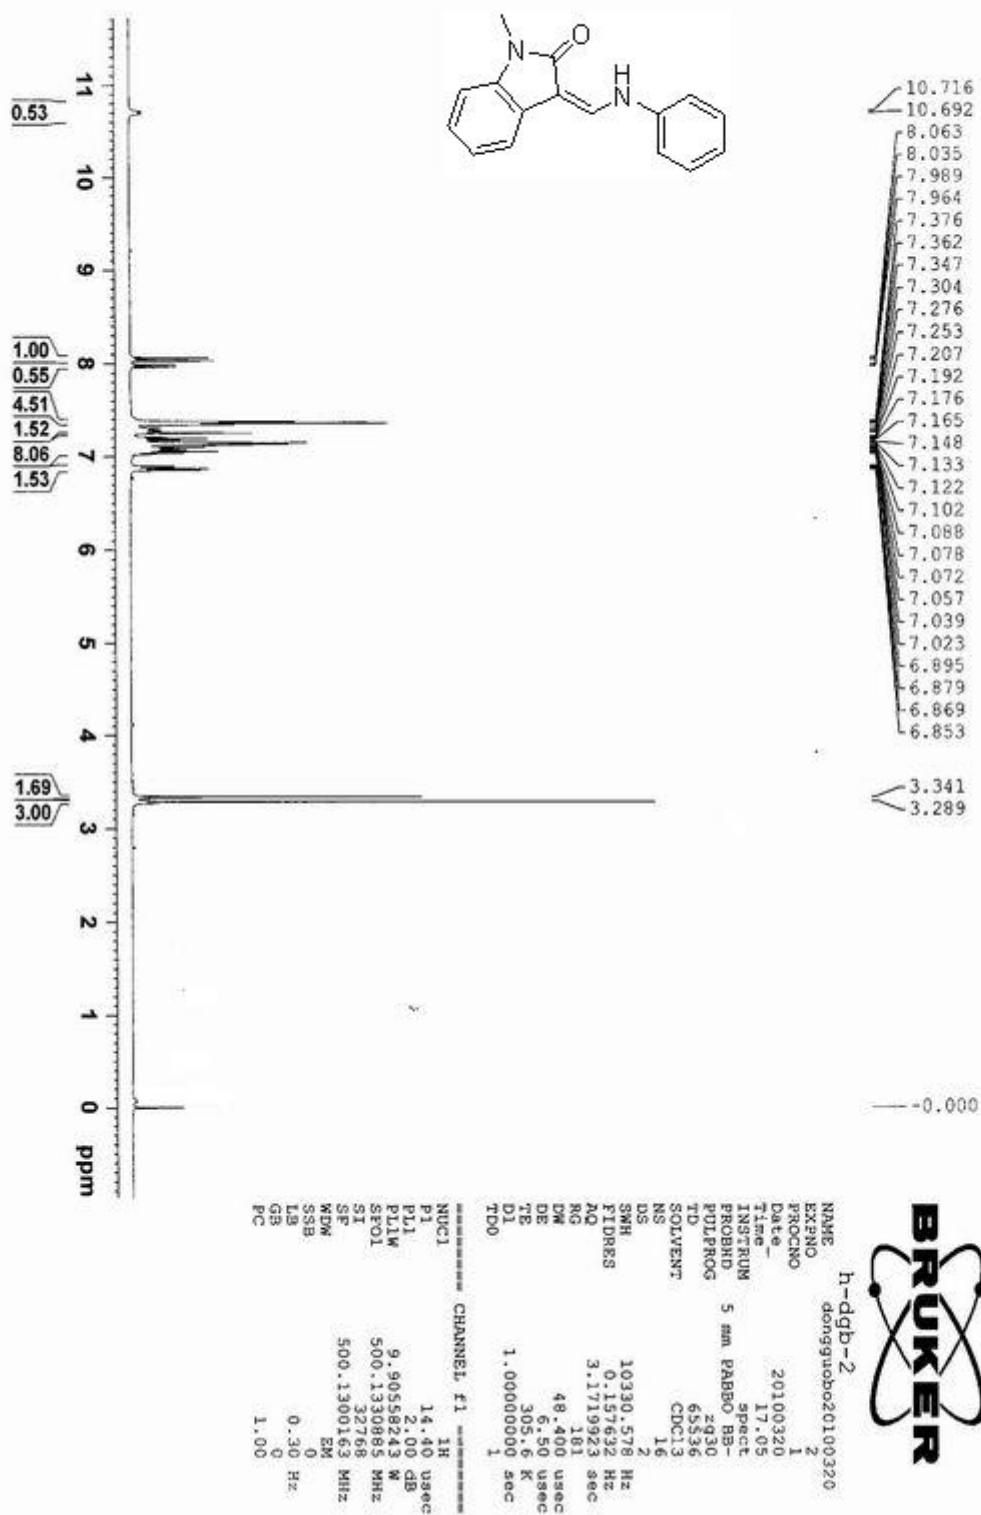



(Z) and (E)-1-Methyl-3-((phenylamino)methylene)indolin-2-one (20)

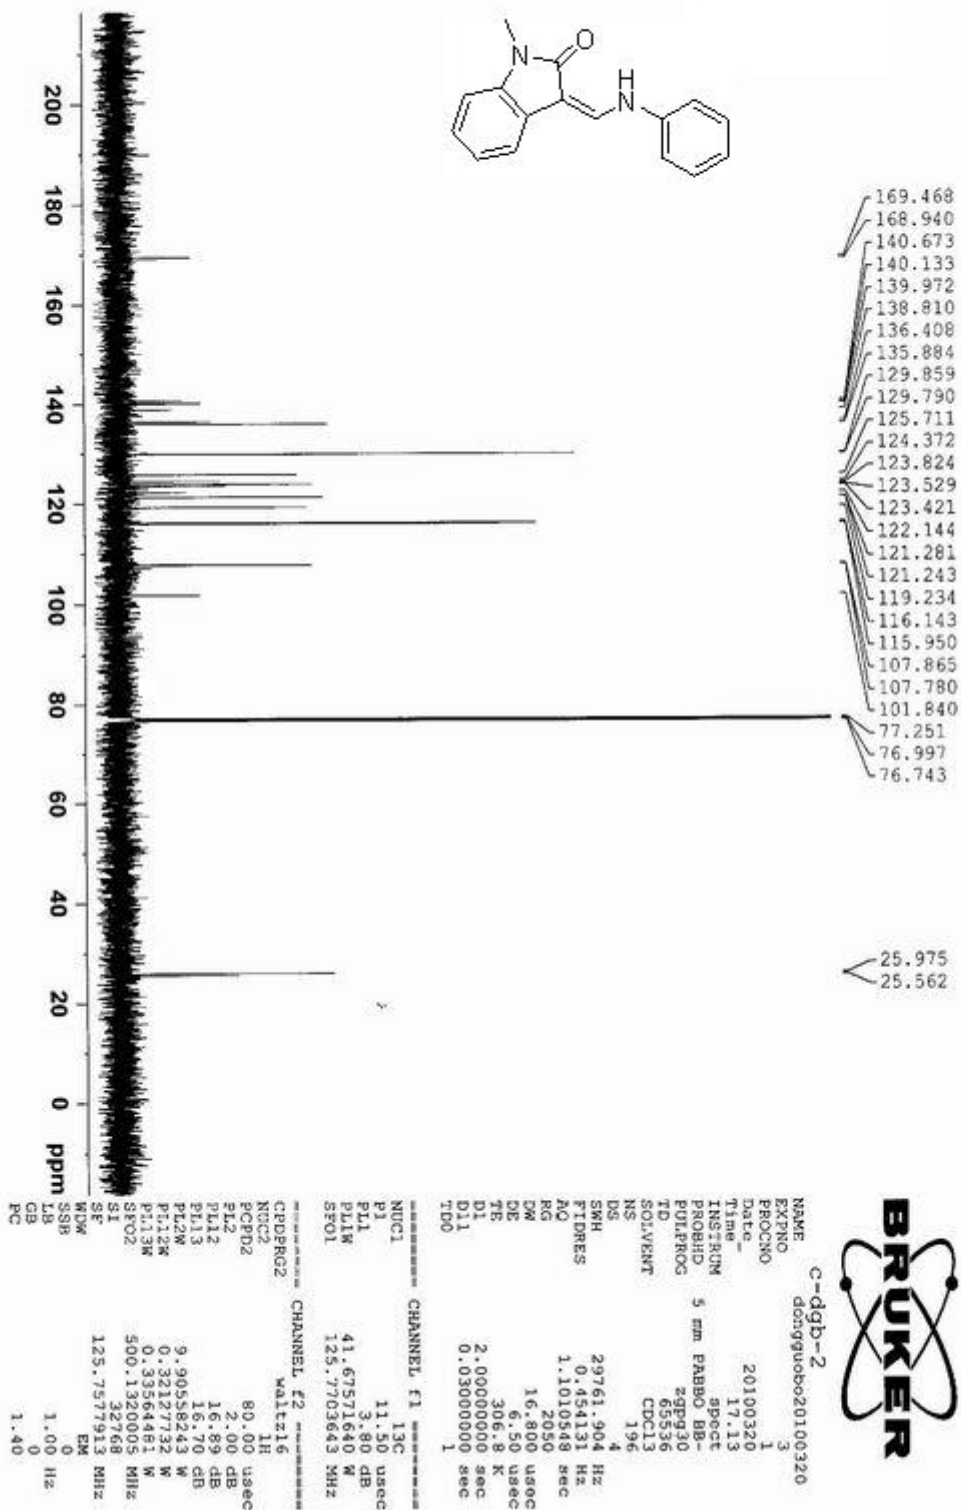

(Z)-3-((4-Chlorophenylamino)methylene)-1-methylindolin-2-one (21)

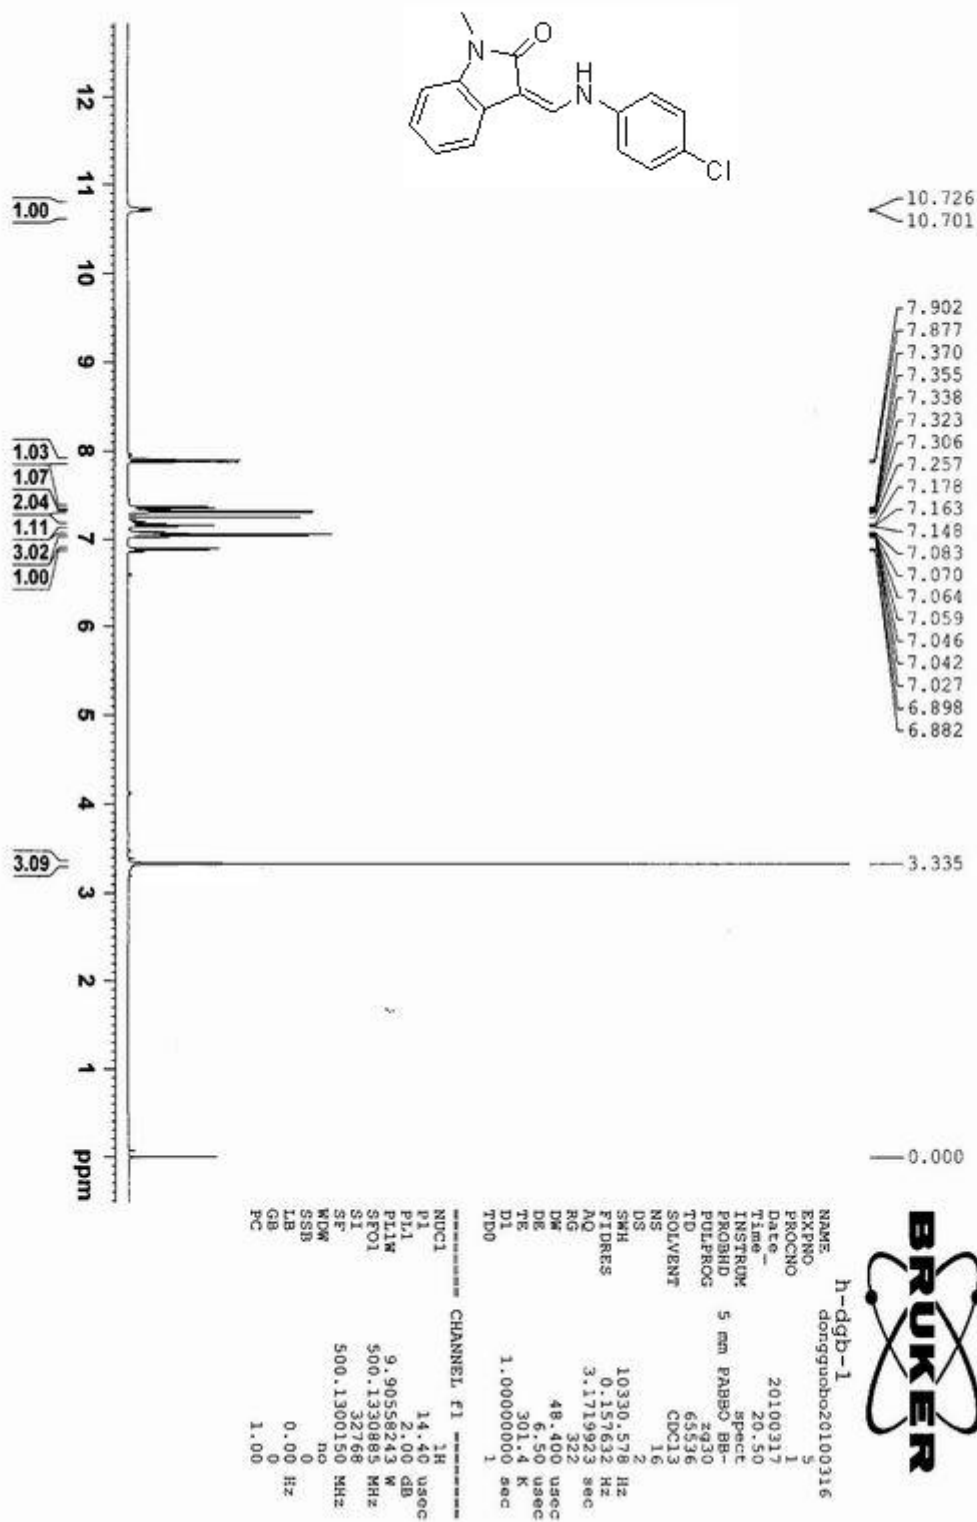

(Z)-3-((4-Chlorophenylamino)methylene)-1-methylindolin-2-one (21)

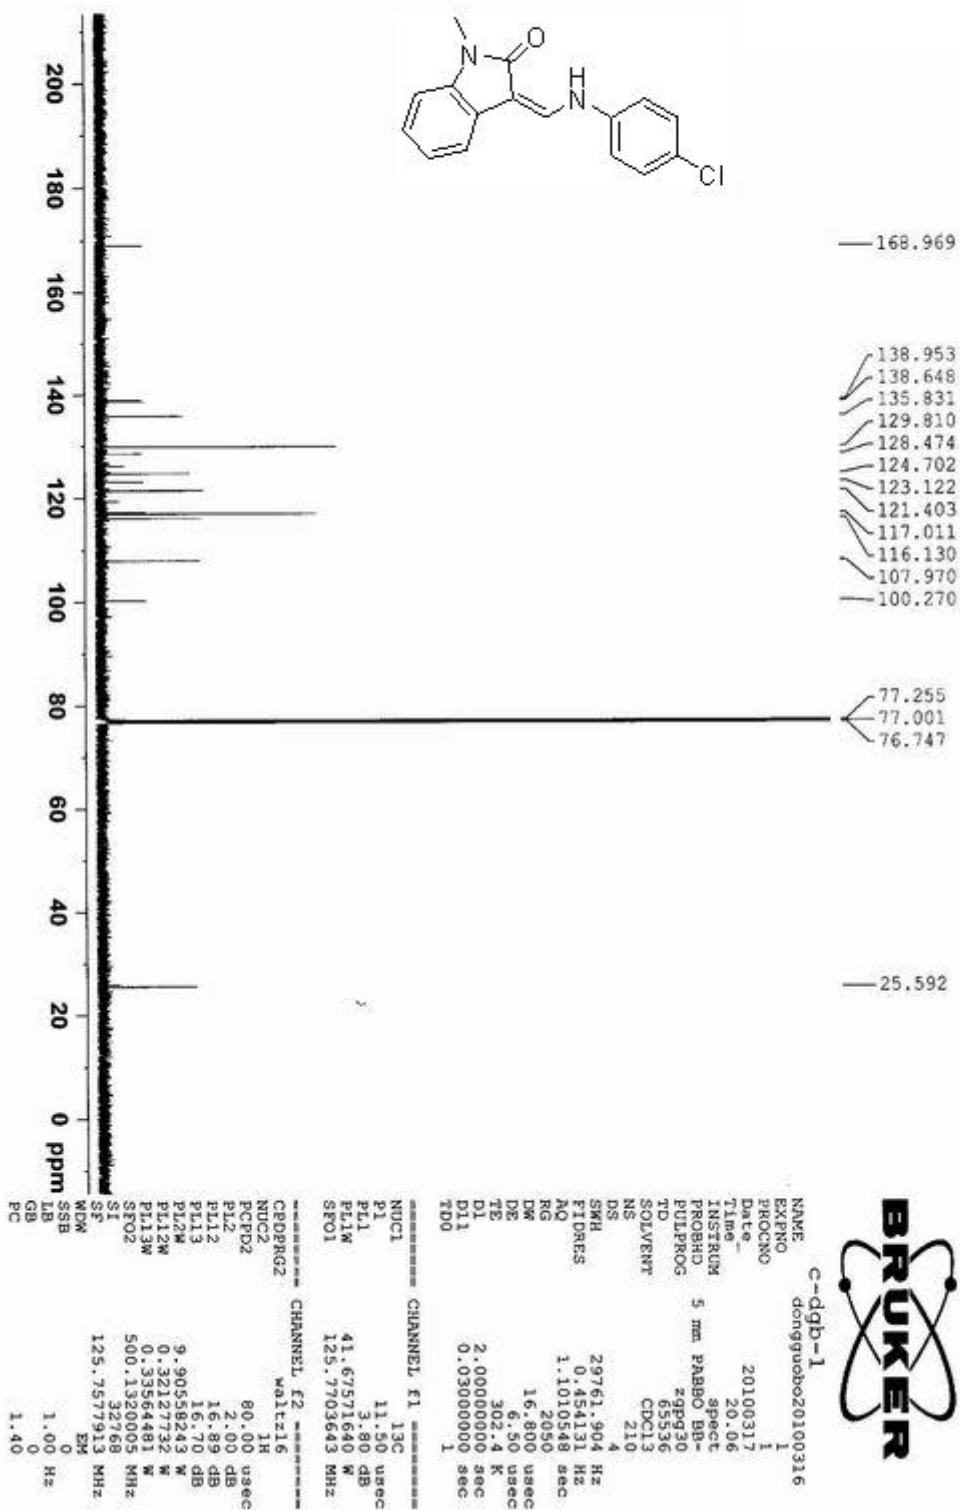

(Z)-3-((4-Acetylphenylamino)methylene)-1-methylindolin-2-one (22)

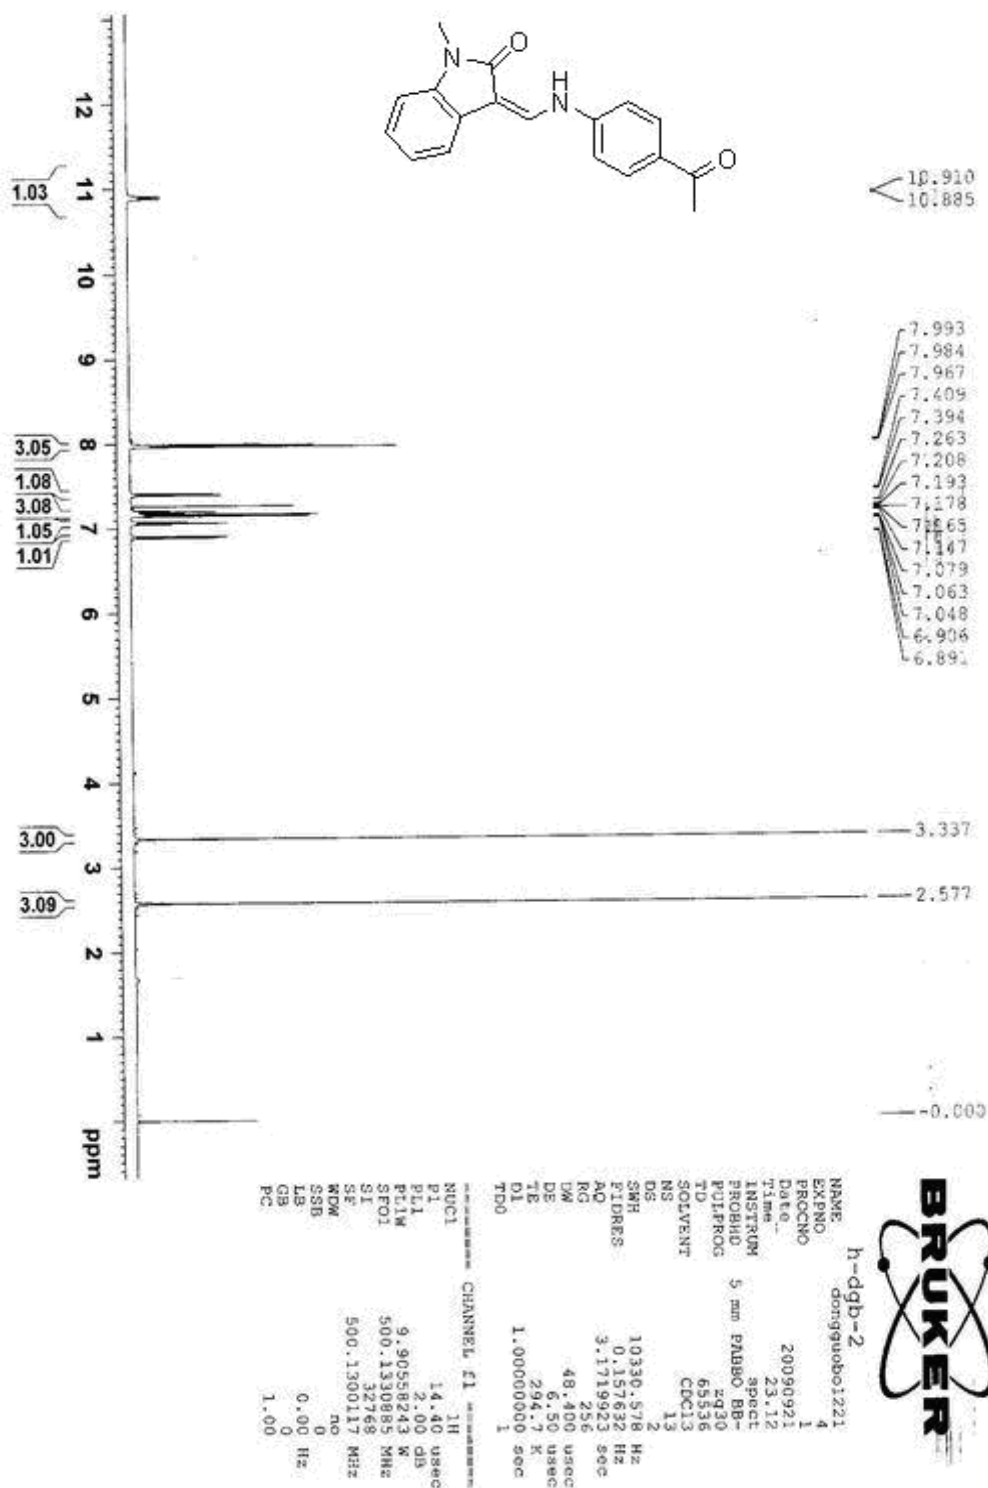

(Z)-3-((4-Acetylphenylamino)methylene)-1-methylindolin-2-one (22)

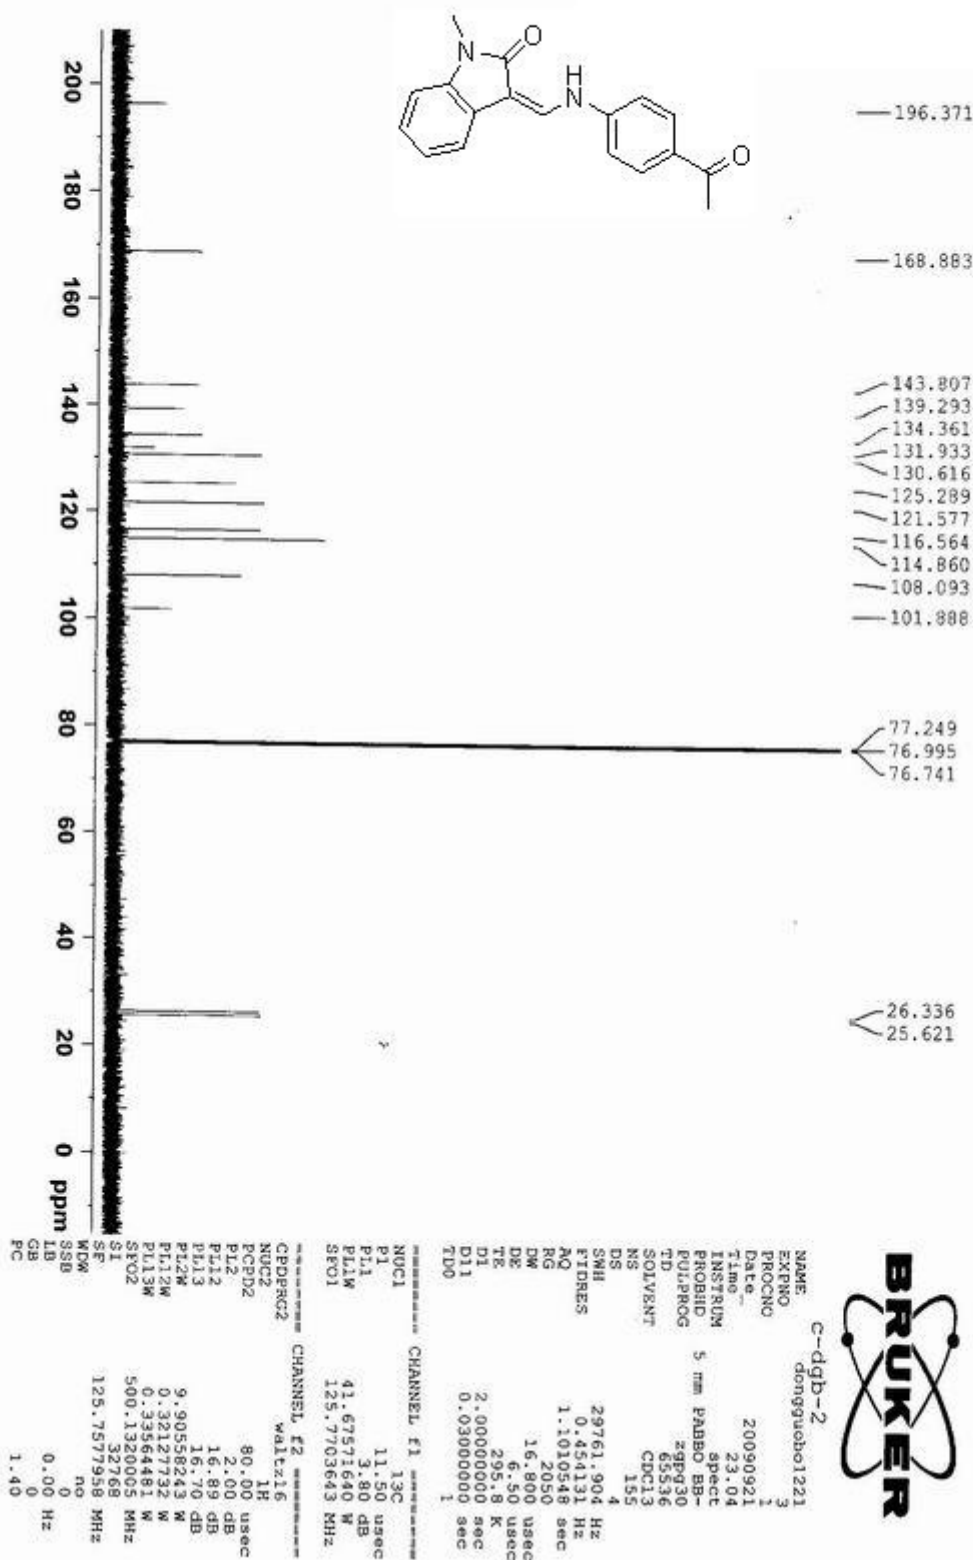

(Z)-3-((Cyclohexylamino)methylene)-1-methylindolin-2-one (23)

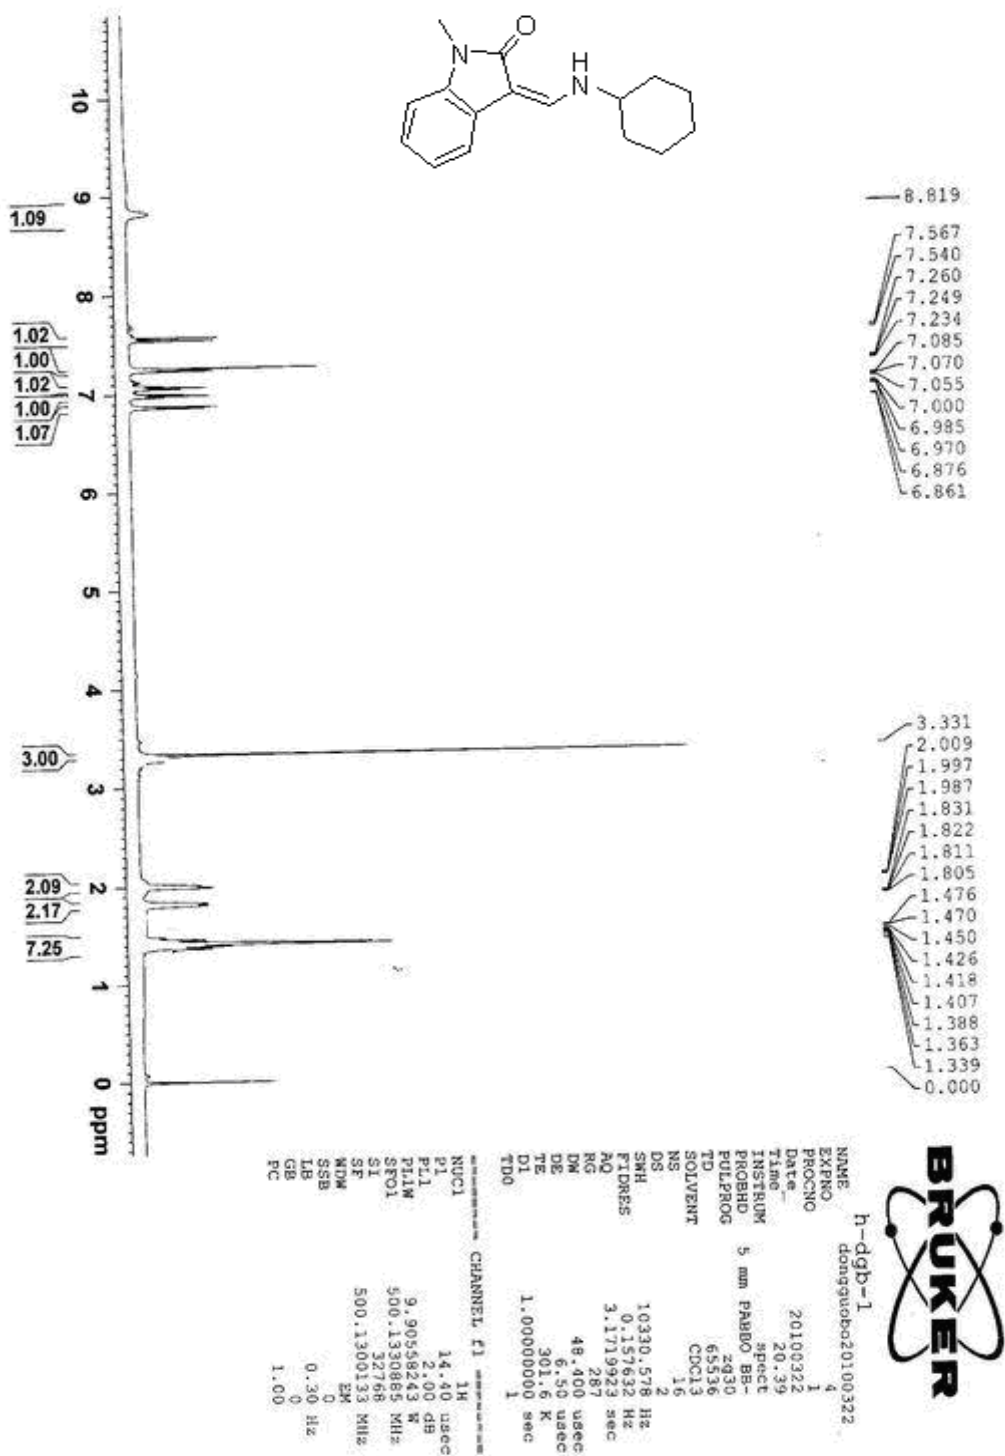

(Z)-3-((Cyclohexylamino)methylene)-1-methylindolin-2-one (23)

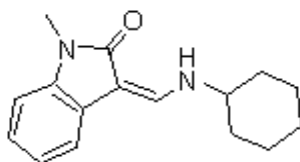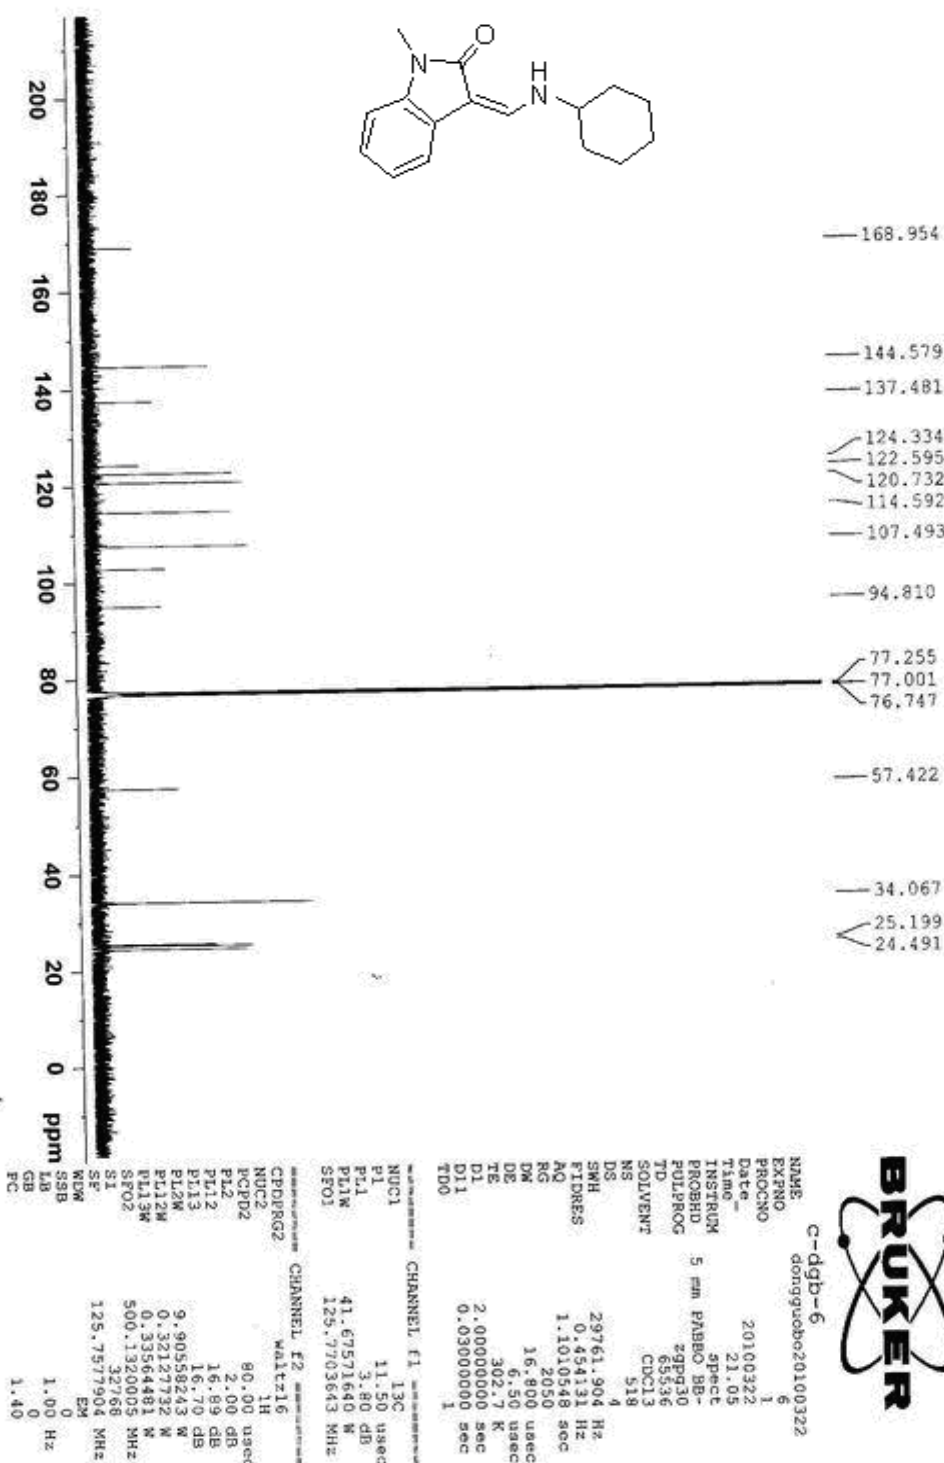

(Z)-(1-methyl-2-oxindolin-3-ylidene)methyl acetate (24)

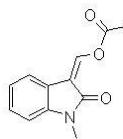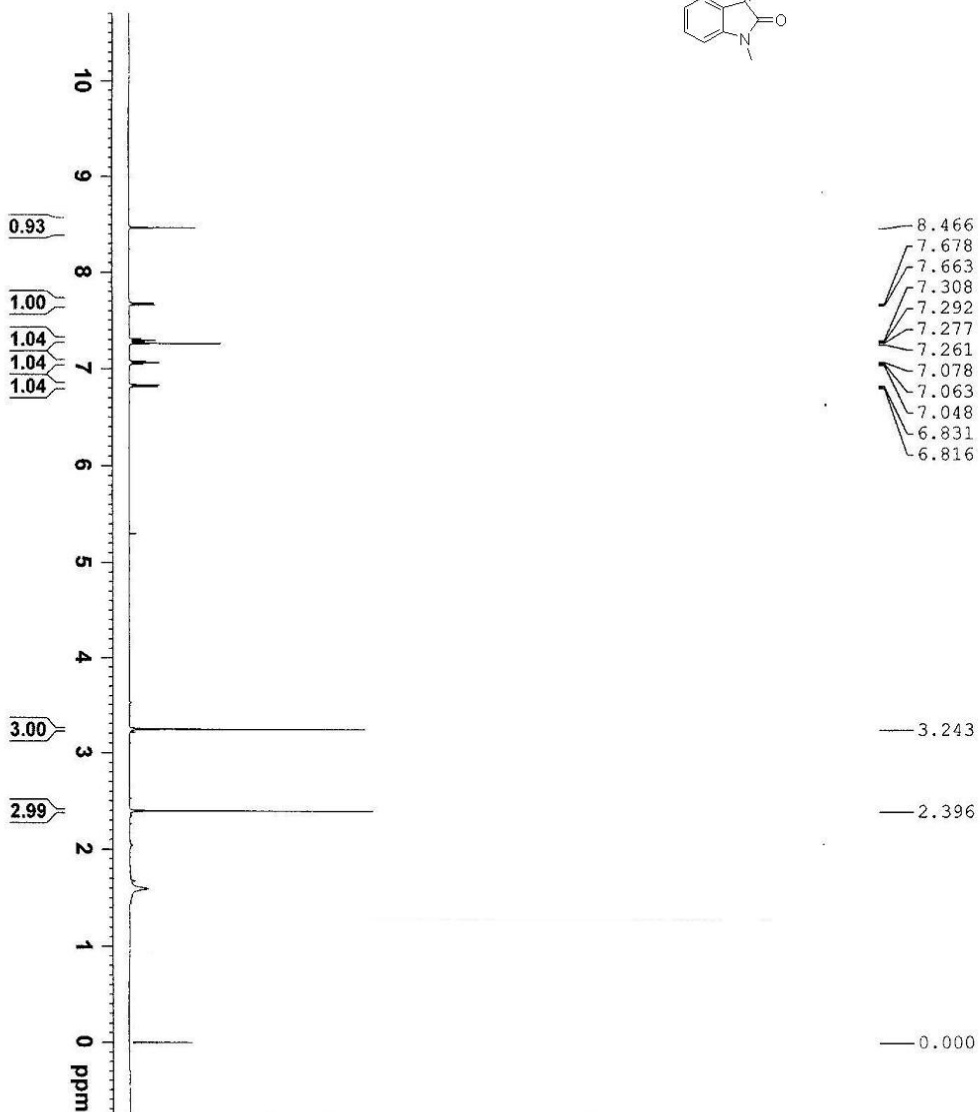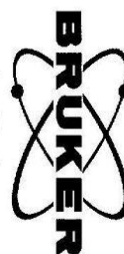

NAME h-dq-b-1  
 EXPNO 3  
 PROCNO 1  
 DATE\_ 20100324  
 TIME\_ 20.47  
 INSTRUM spect  
 PROBHD 5 mm EASYO BB-  
 PULPROG zg30  
 TD 65536  
 SOLVENT CDCl3  
 NS 16  
 DS 2  
 SWH 10330.578 Hz  
 FIDRES 0.157632 Hz  
 AQ 3.1719923 sec  
 RG 287  
 DW 48.400 usec  
 DE 6.50 usec  
 TE 300.2 K  
 D1 1.00000000 sec  
 TD0 1

===== CHANNEL f1 =====  
 NUC1 1H  
 P1 14.40 usec  
 PL1 2.00 dB  
 PL1W 9.90558243 W  
 SFO1 500.1330885 MHz  
 SI 32768  
 SF 500.1300129 MHz  
 WDW EM  
 SSB 0  
 TB 0  
 GB 0  
 PC 1.00



(Z)-(1-methyl-2-oxoindolin-3-ylidene)methyl acetate (24)

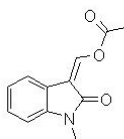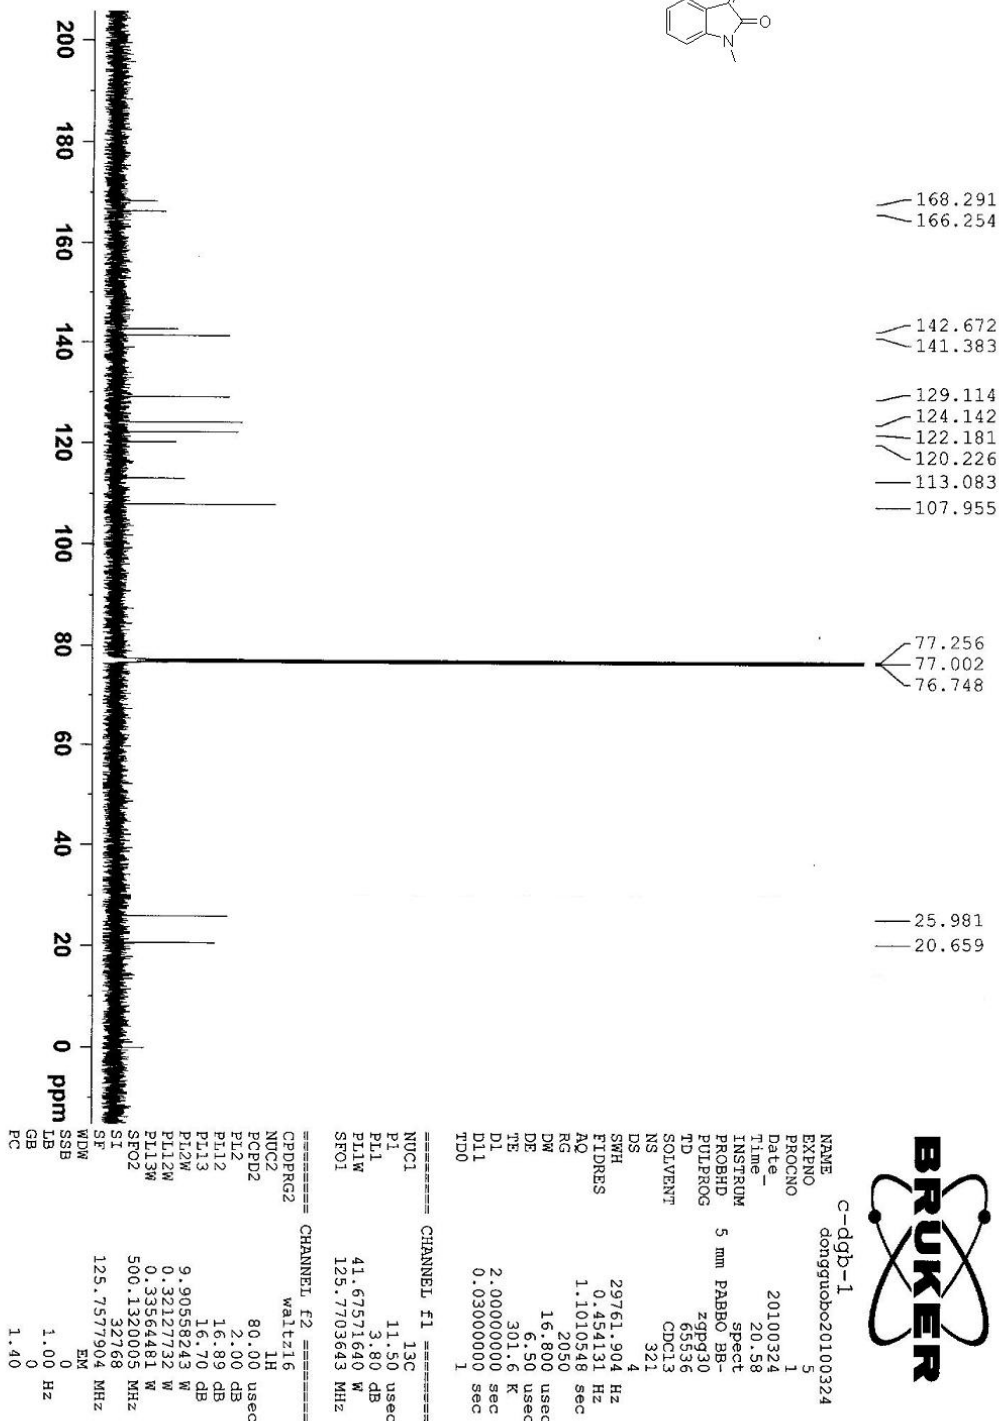

**(E) The X-ray single-crystal diffraction analysis of product 3**

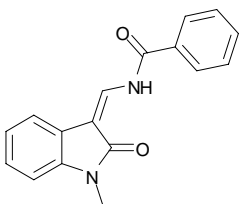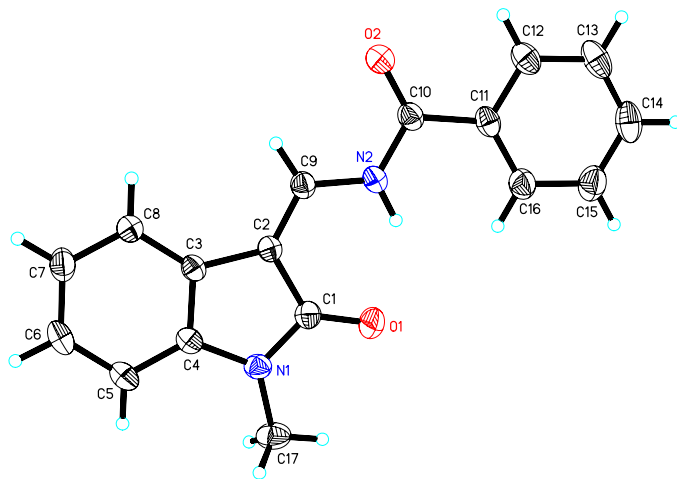

Supplement: c1cc11602a.pdf [file c1cc11602a.pdf]
